# Supplementary material for: The Influence of Papermaking Process on the Properties of Chinese Handmade Bamboo Paper
Source: publisher site journal article supplement (doi:10.1515/res-2024-0024), 2025-03-01

**Study on the influence of papermaking process on the properties of Chinese handmade bamboo paper**


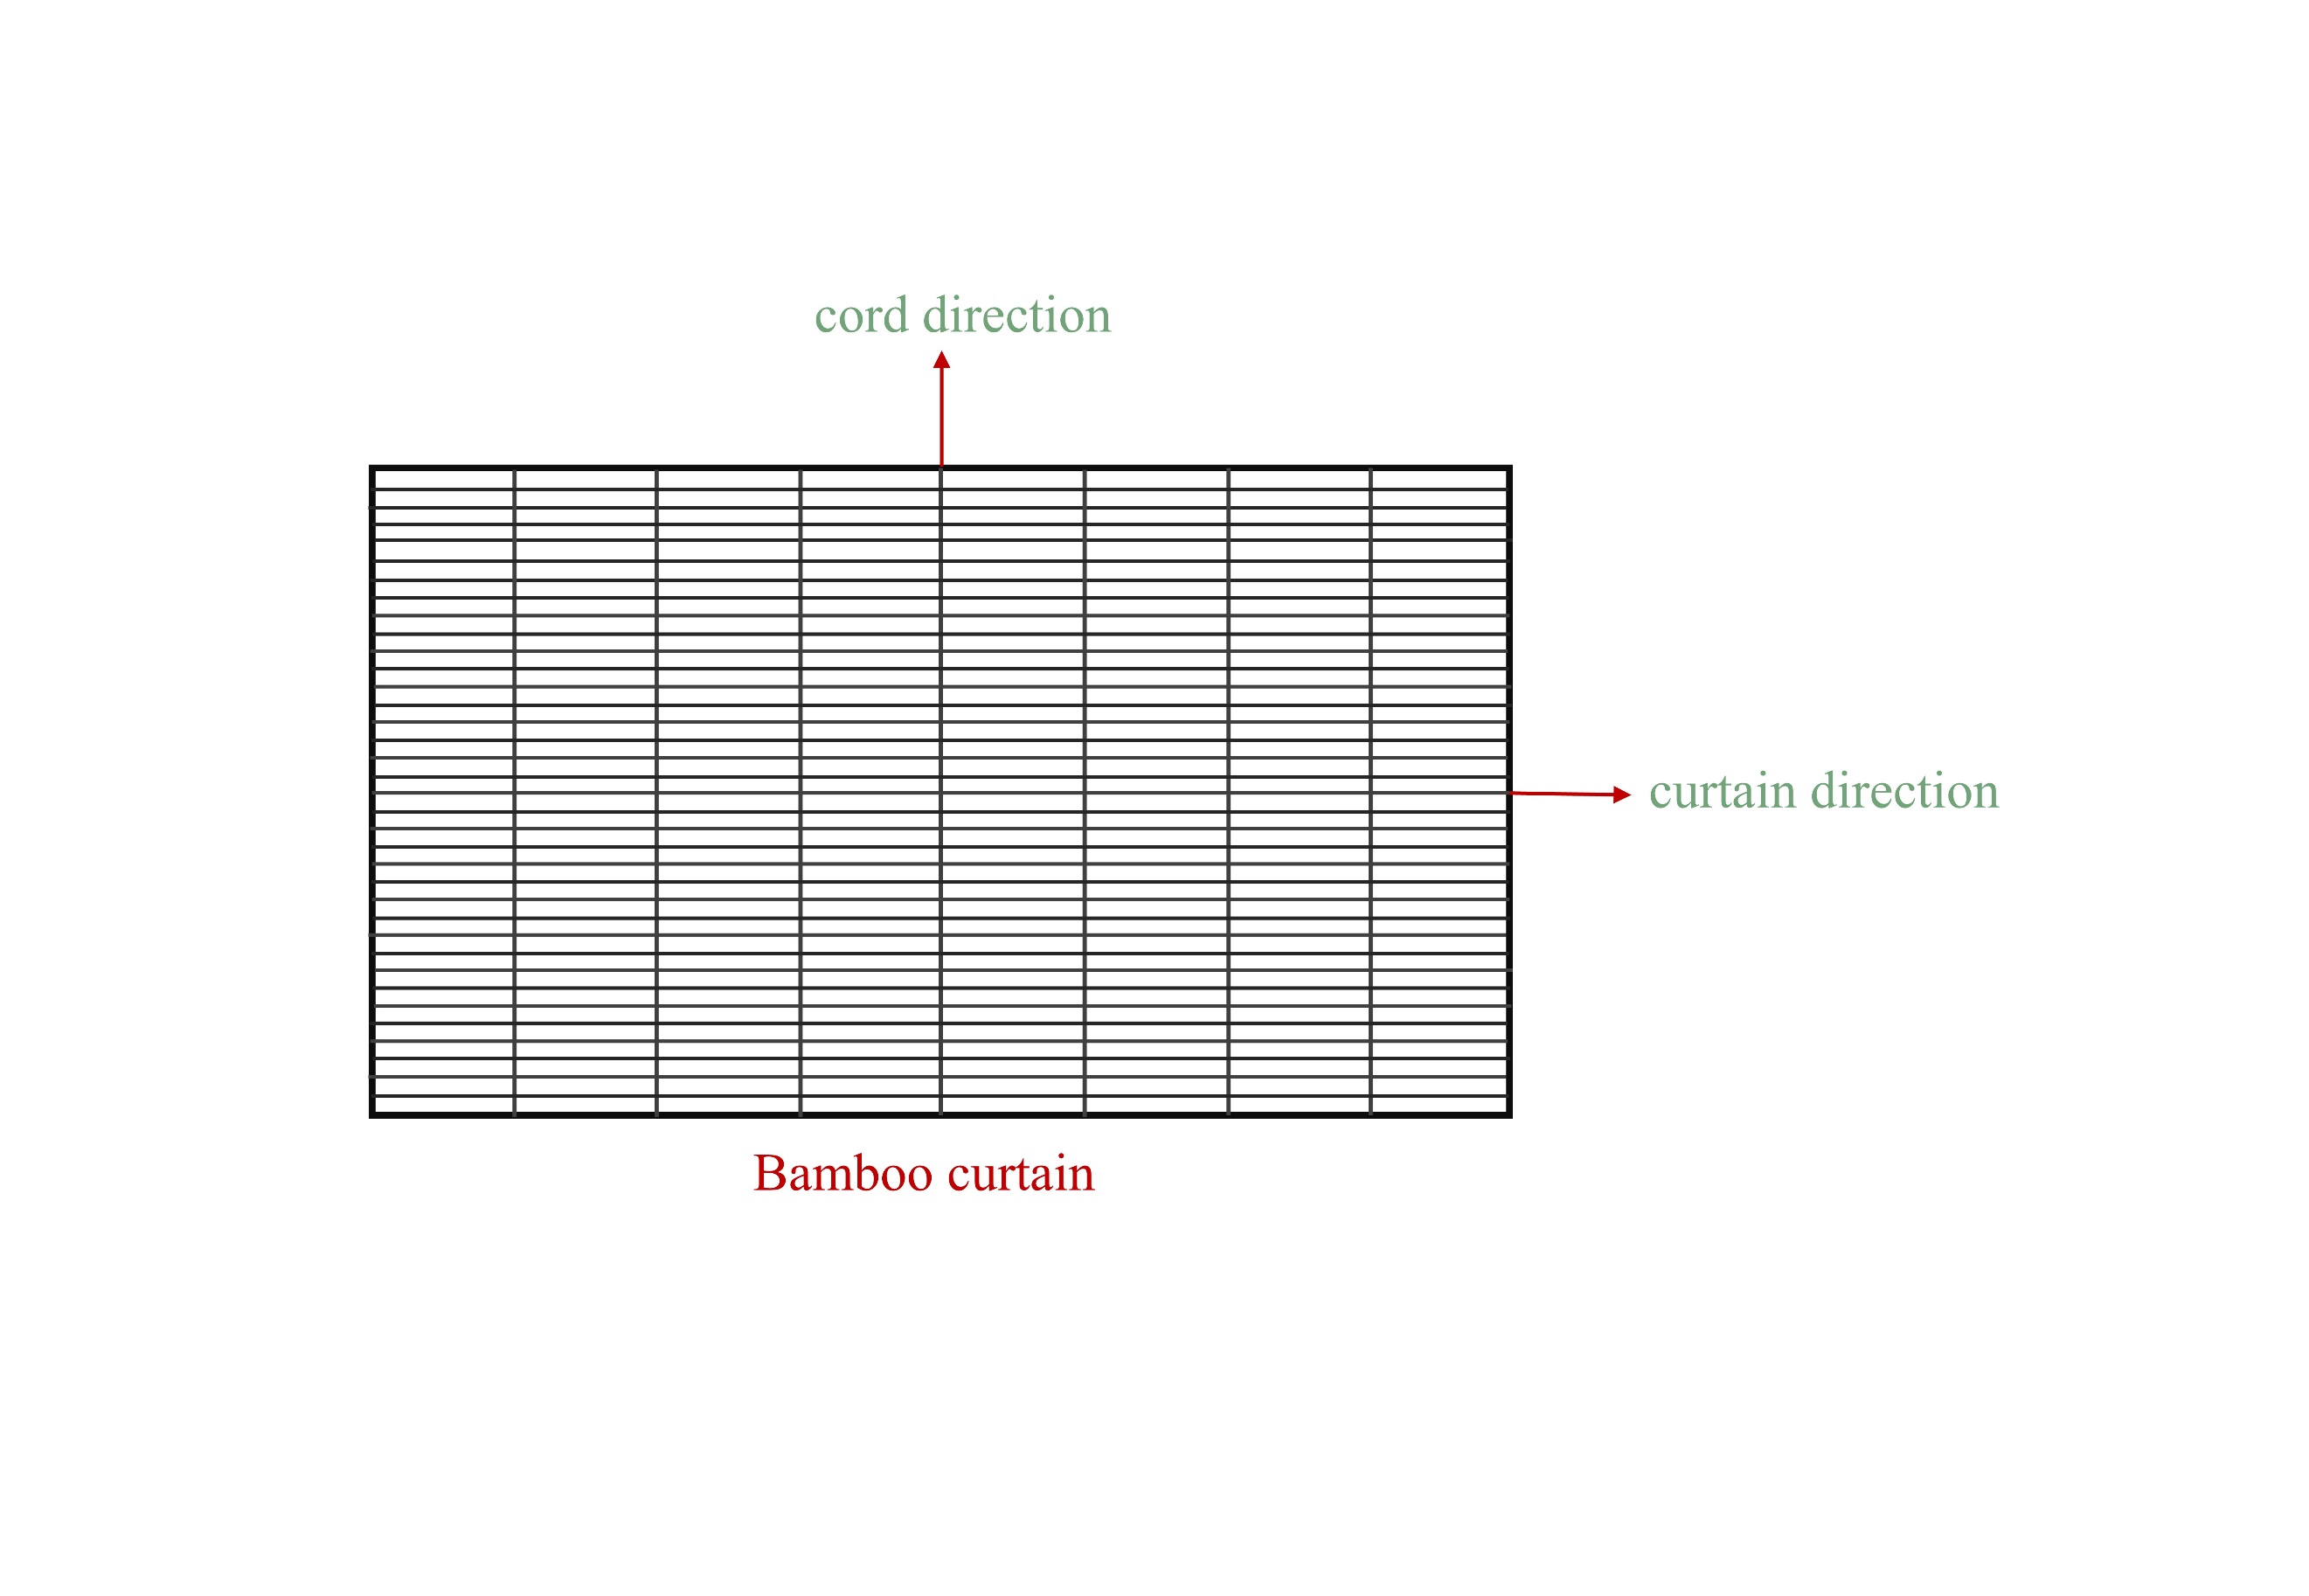


**Fig.S1. Chinese Handmade Paper Bamboo Curtain Schematic**


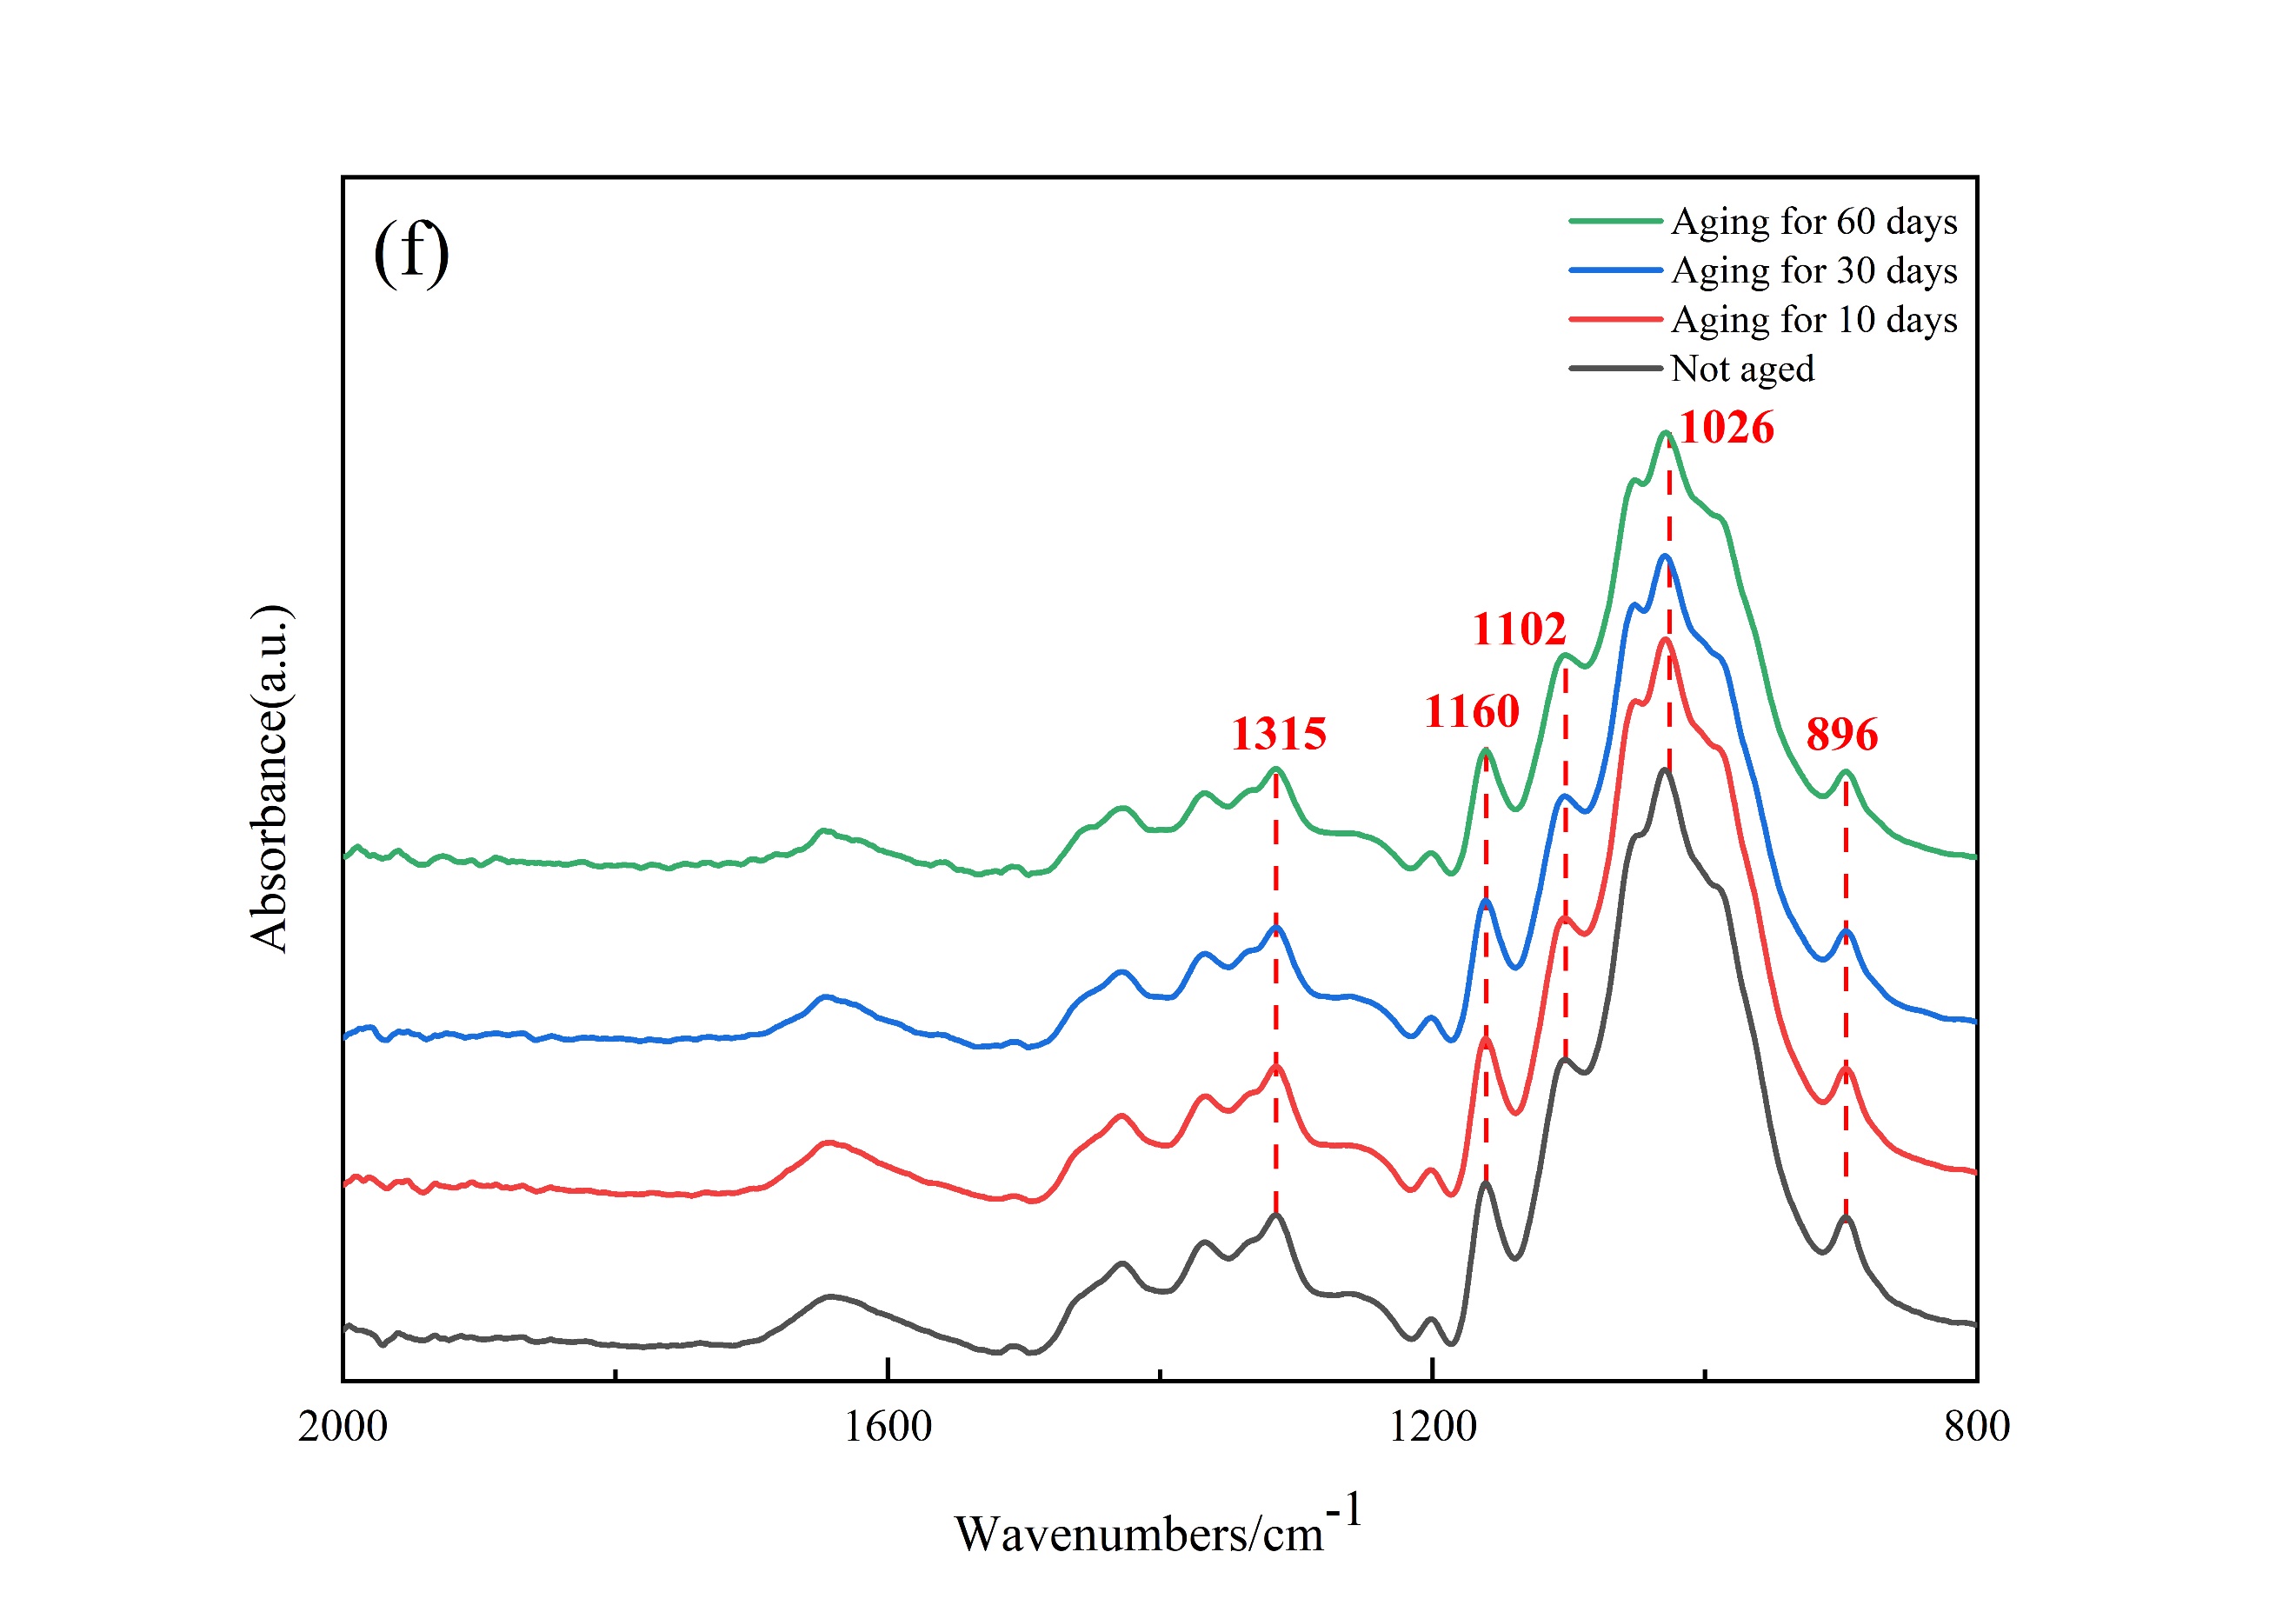

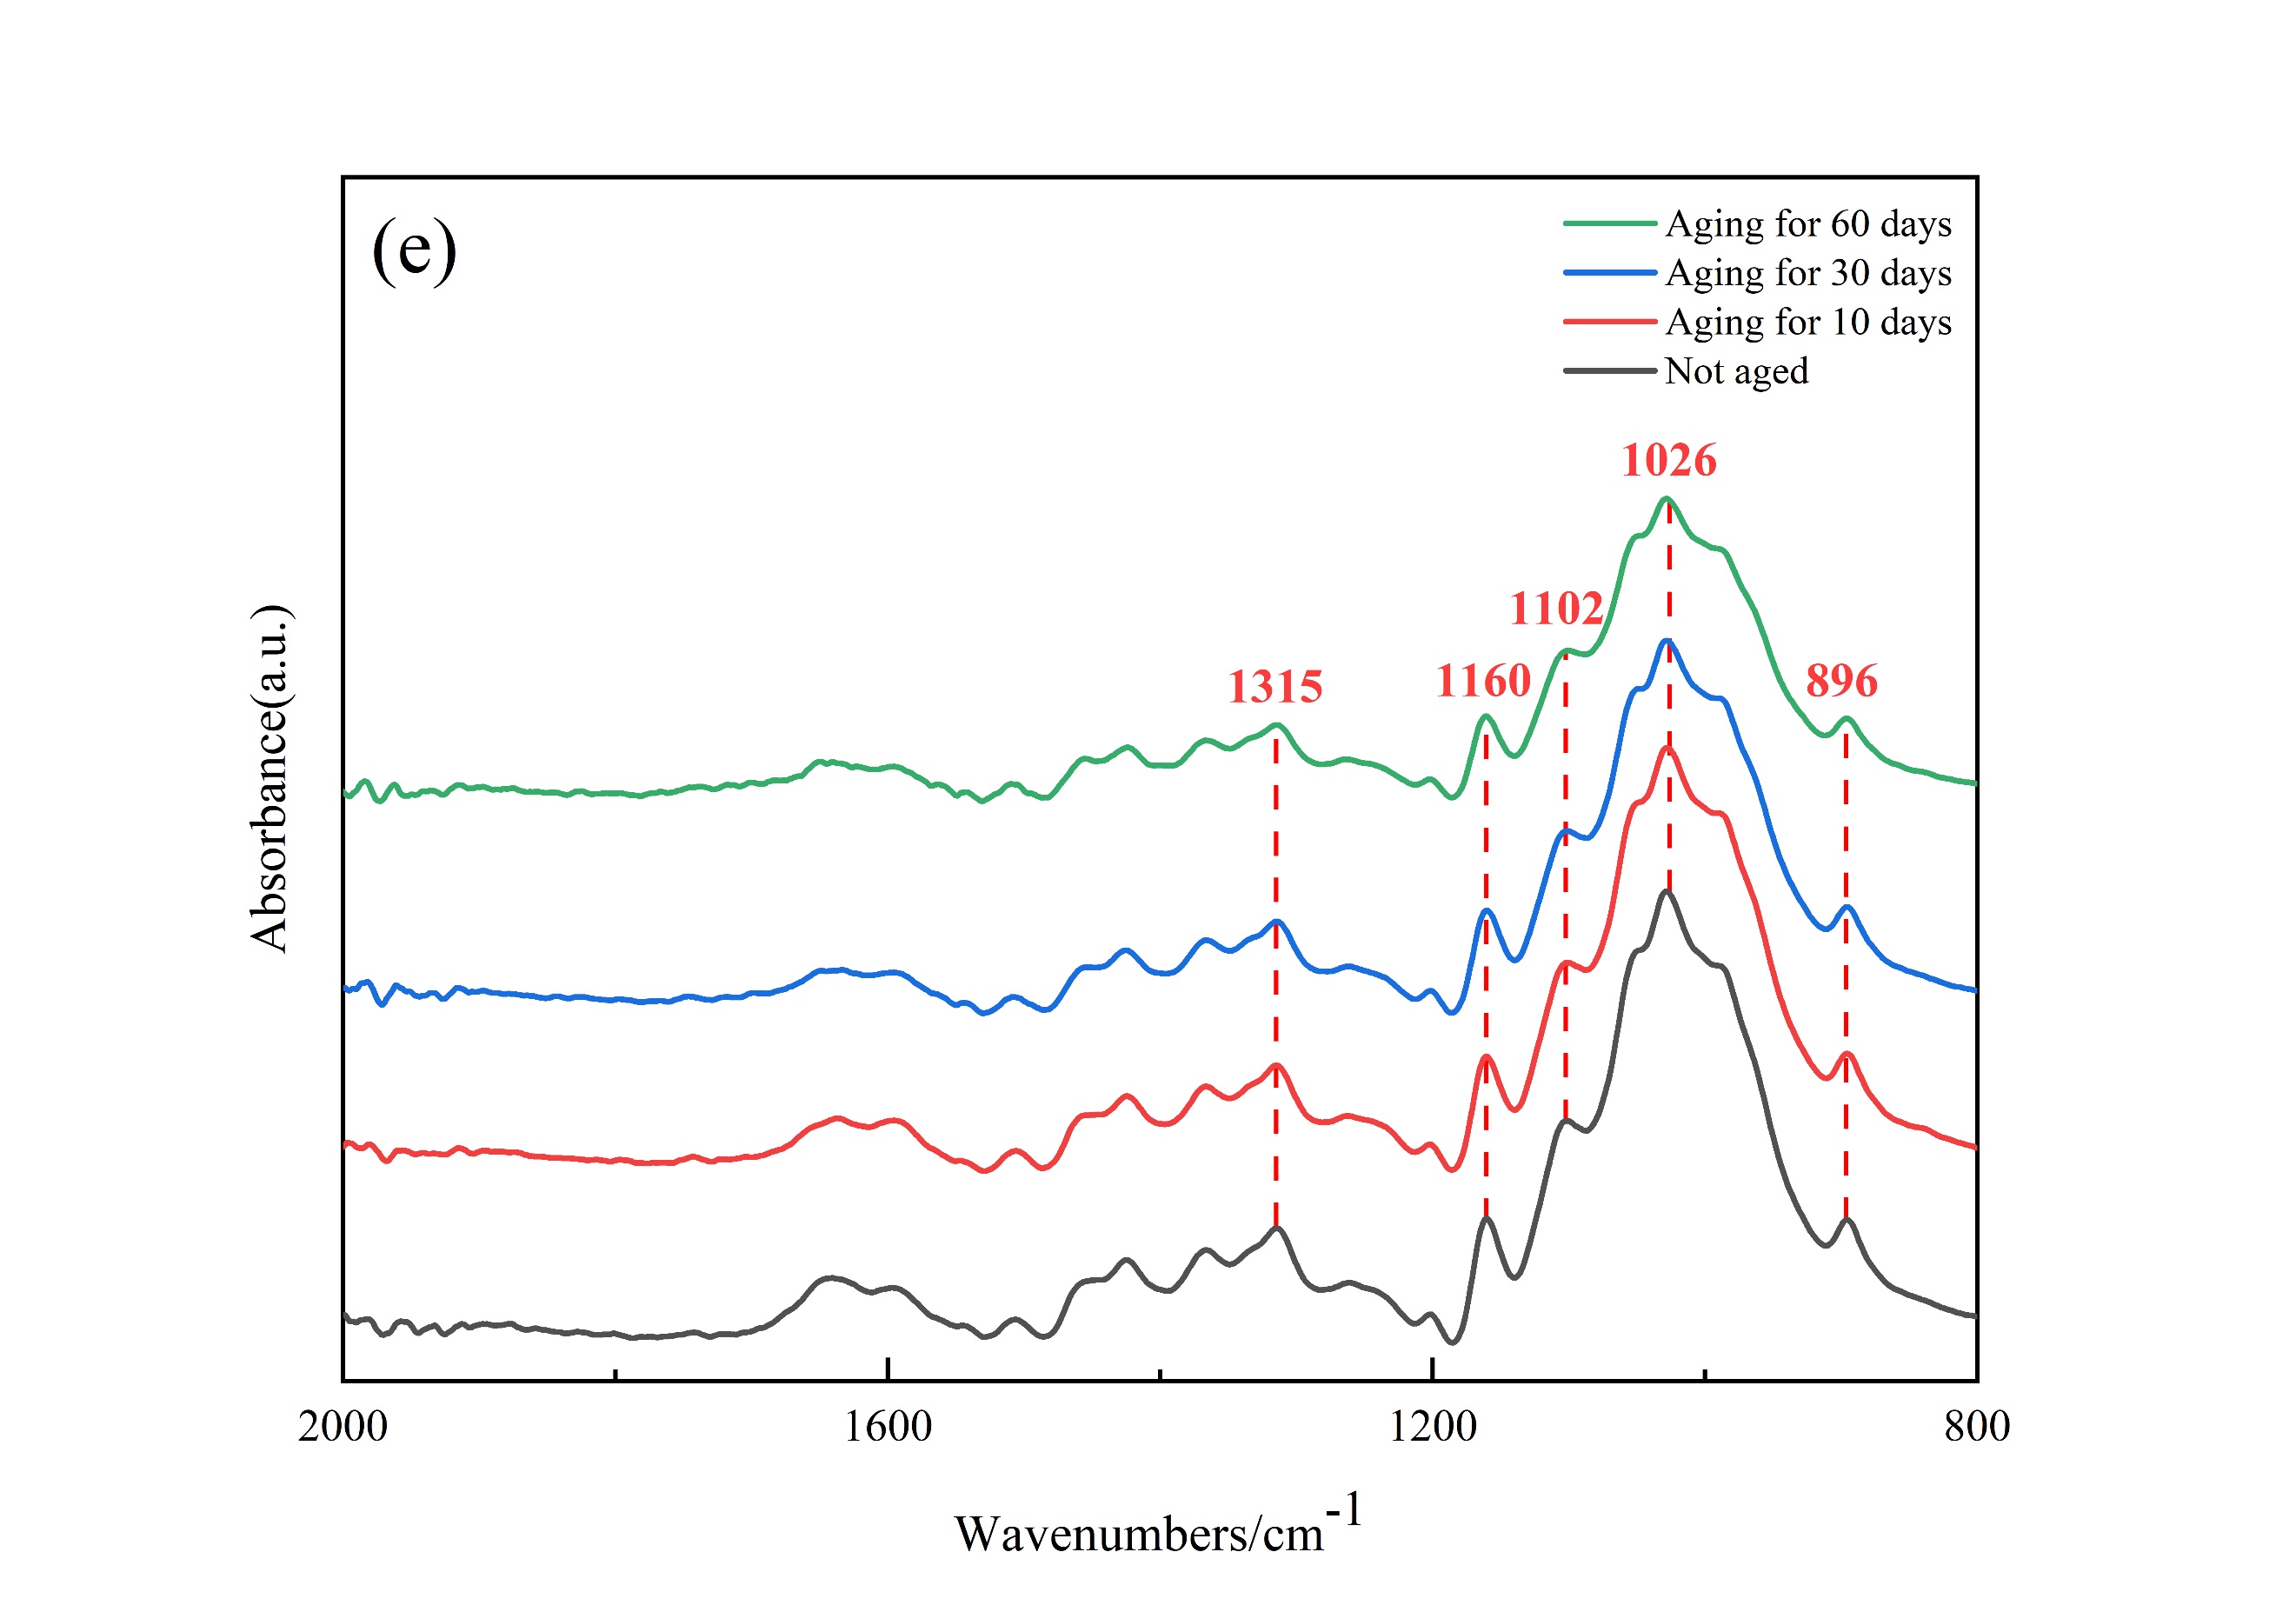

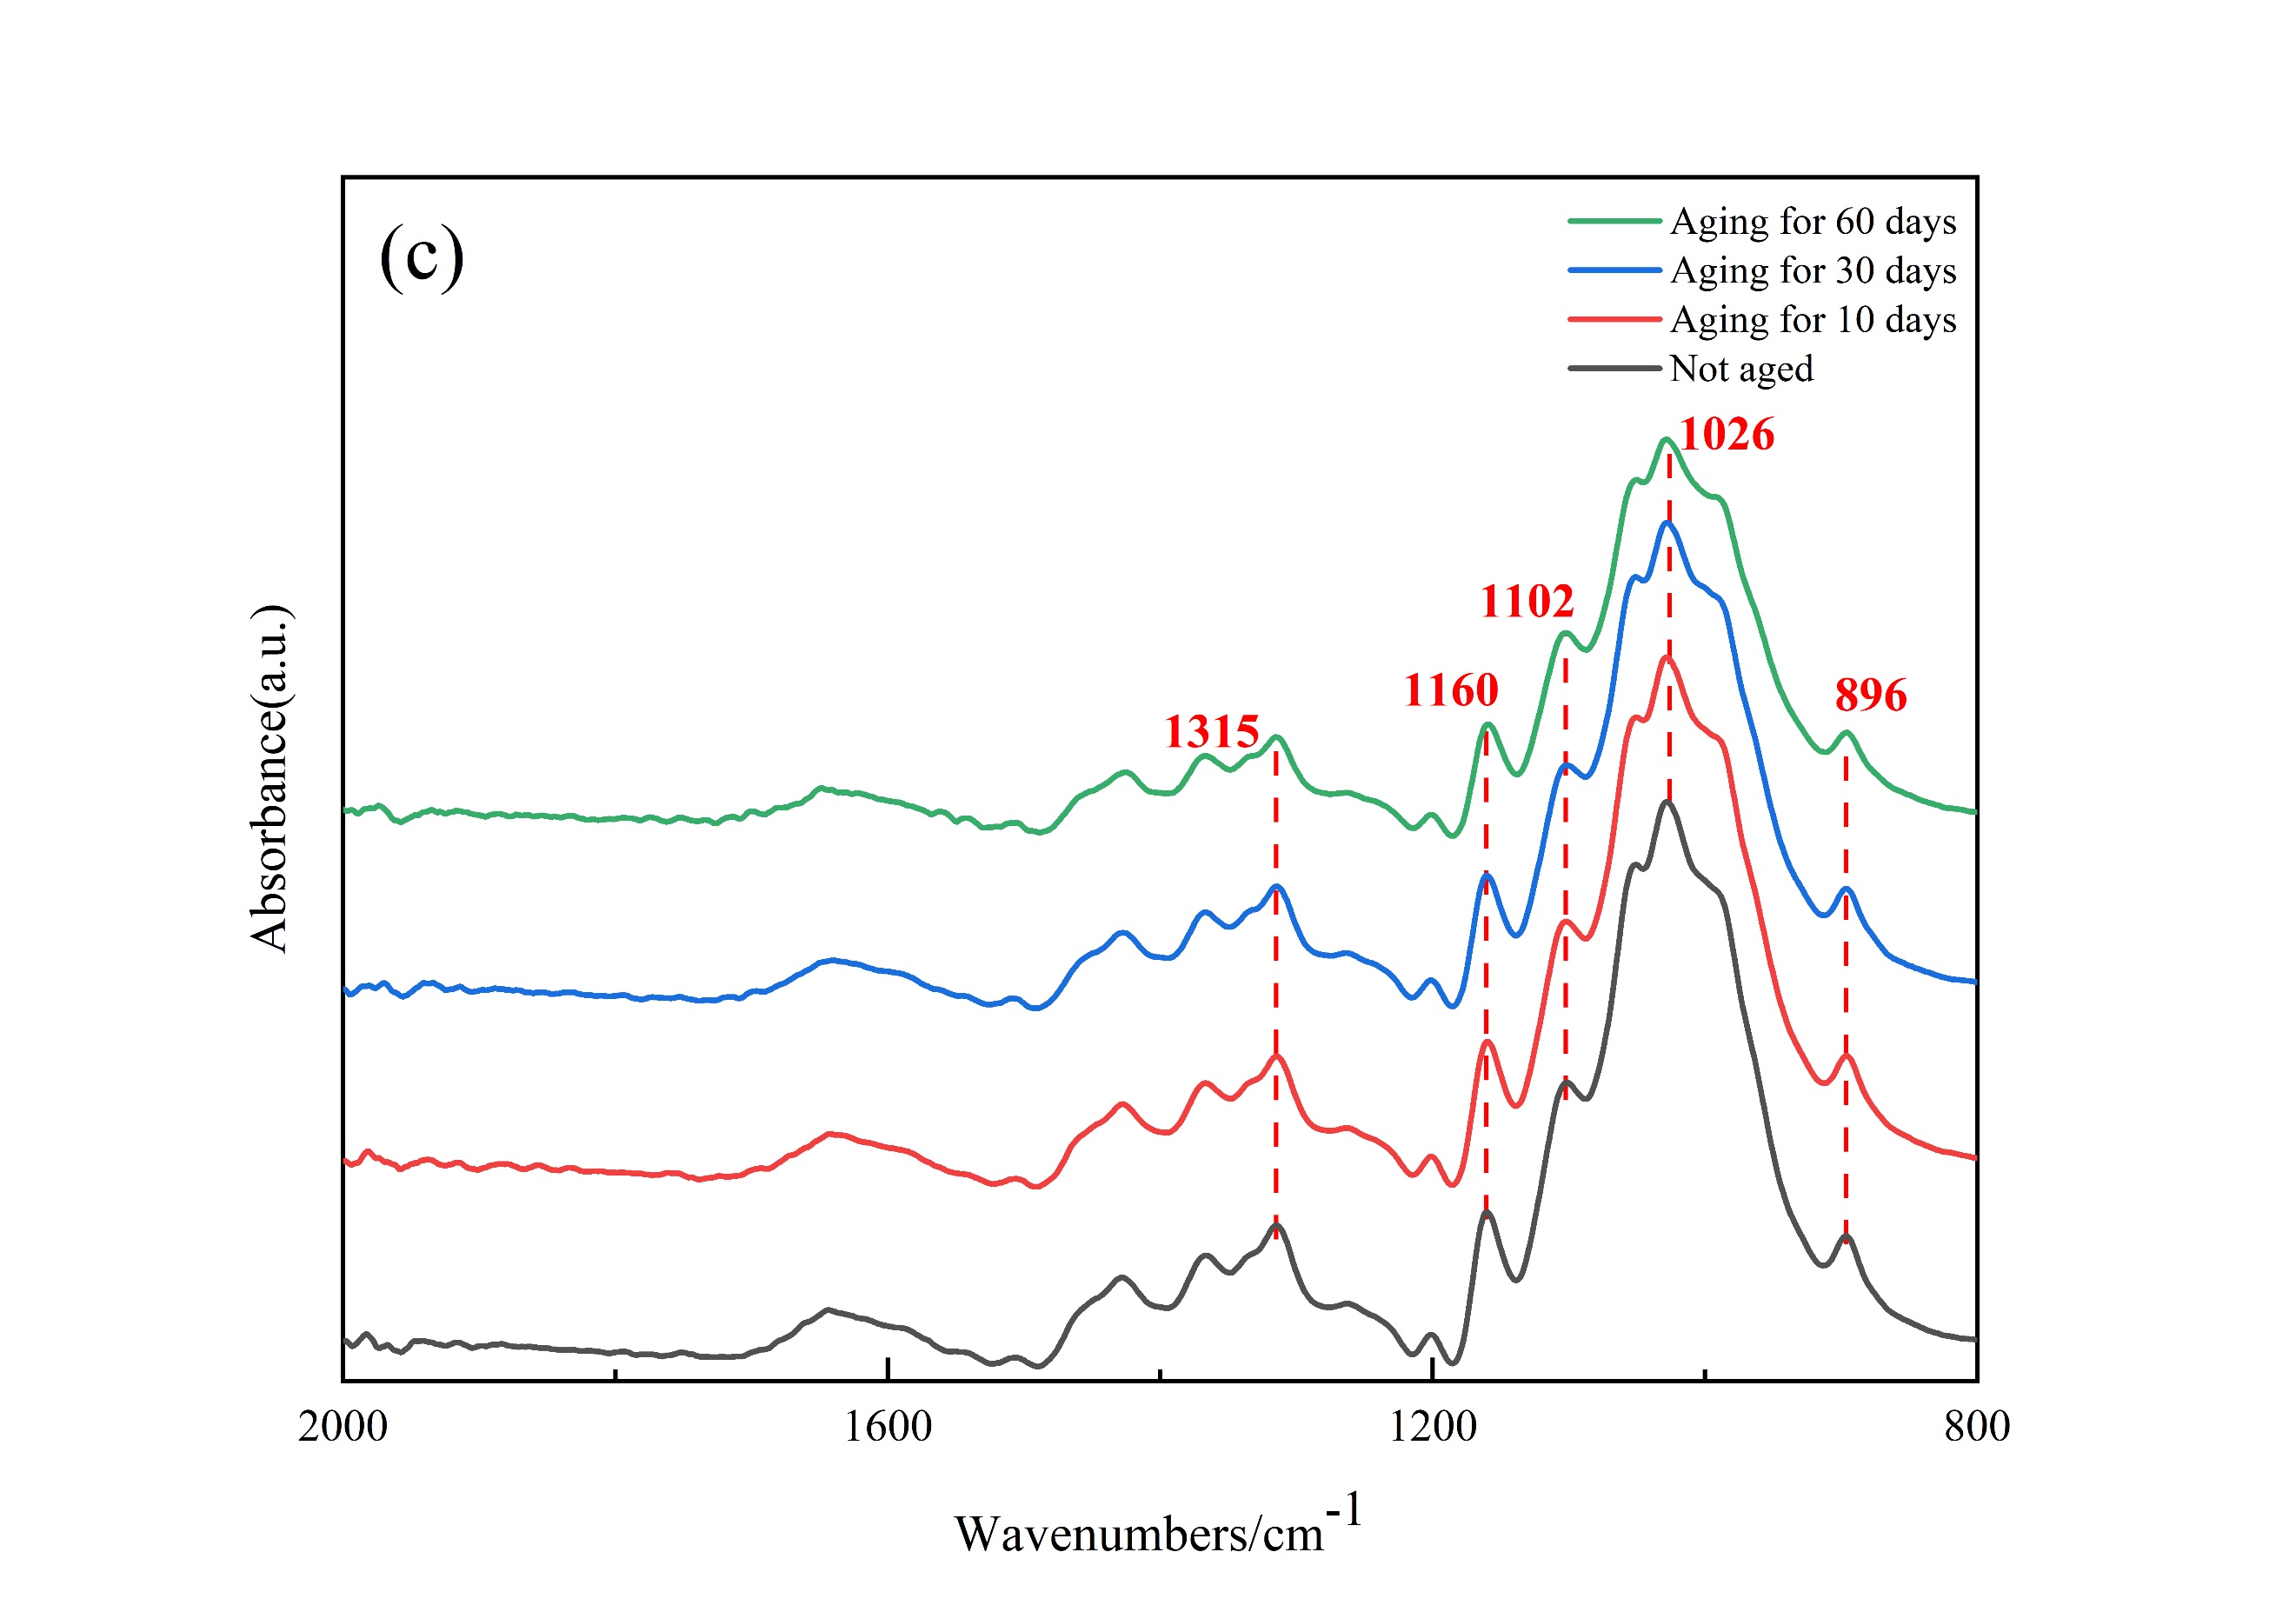

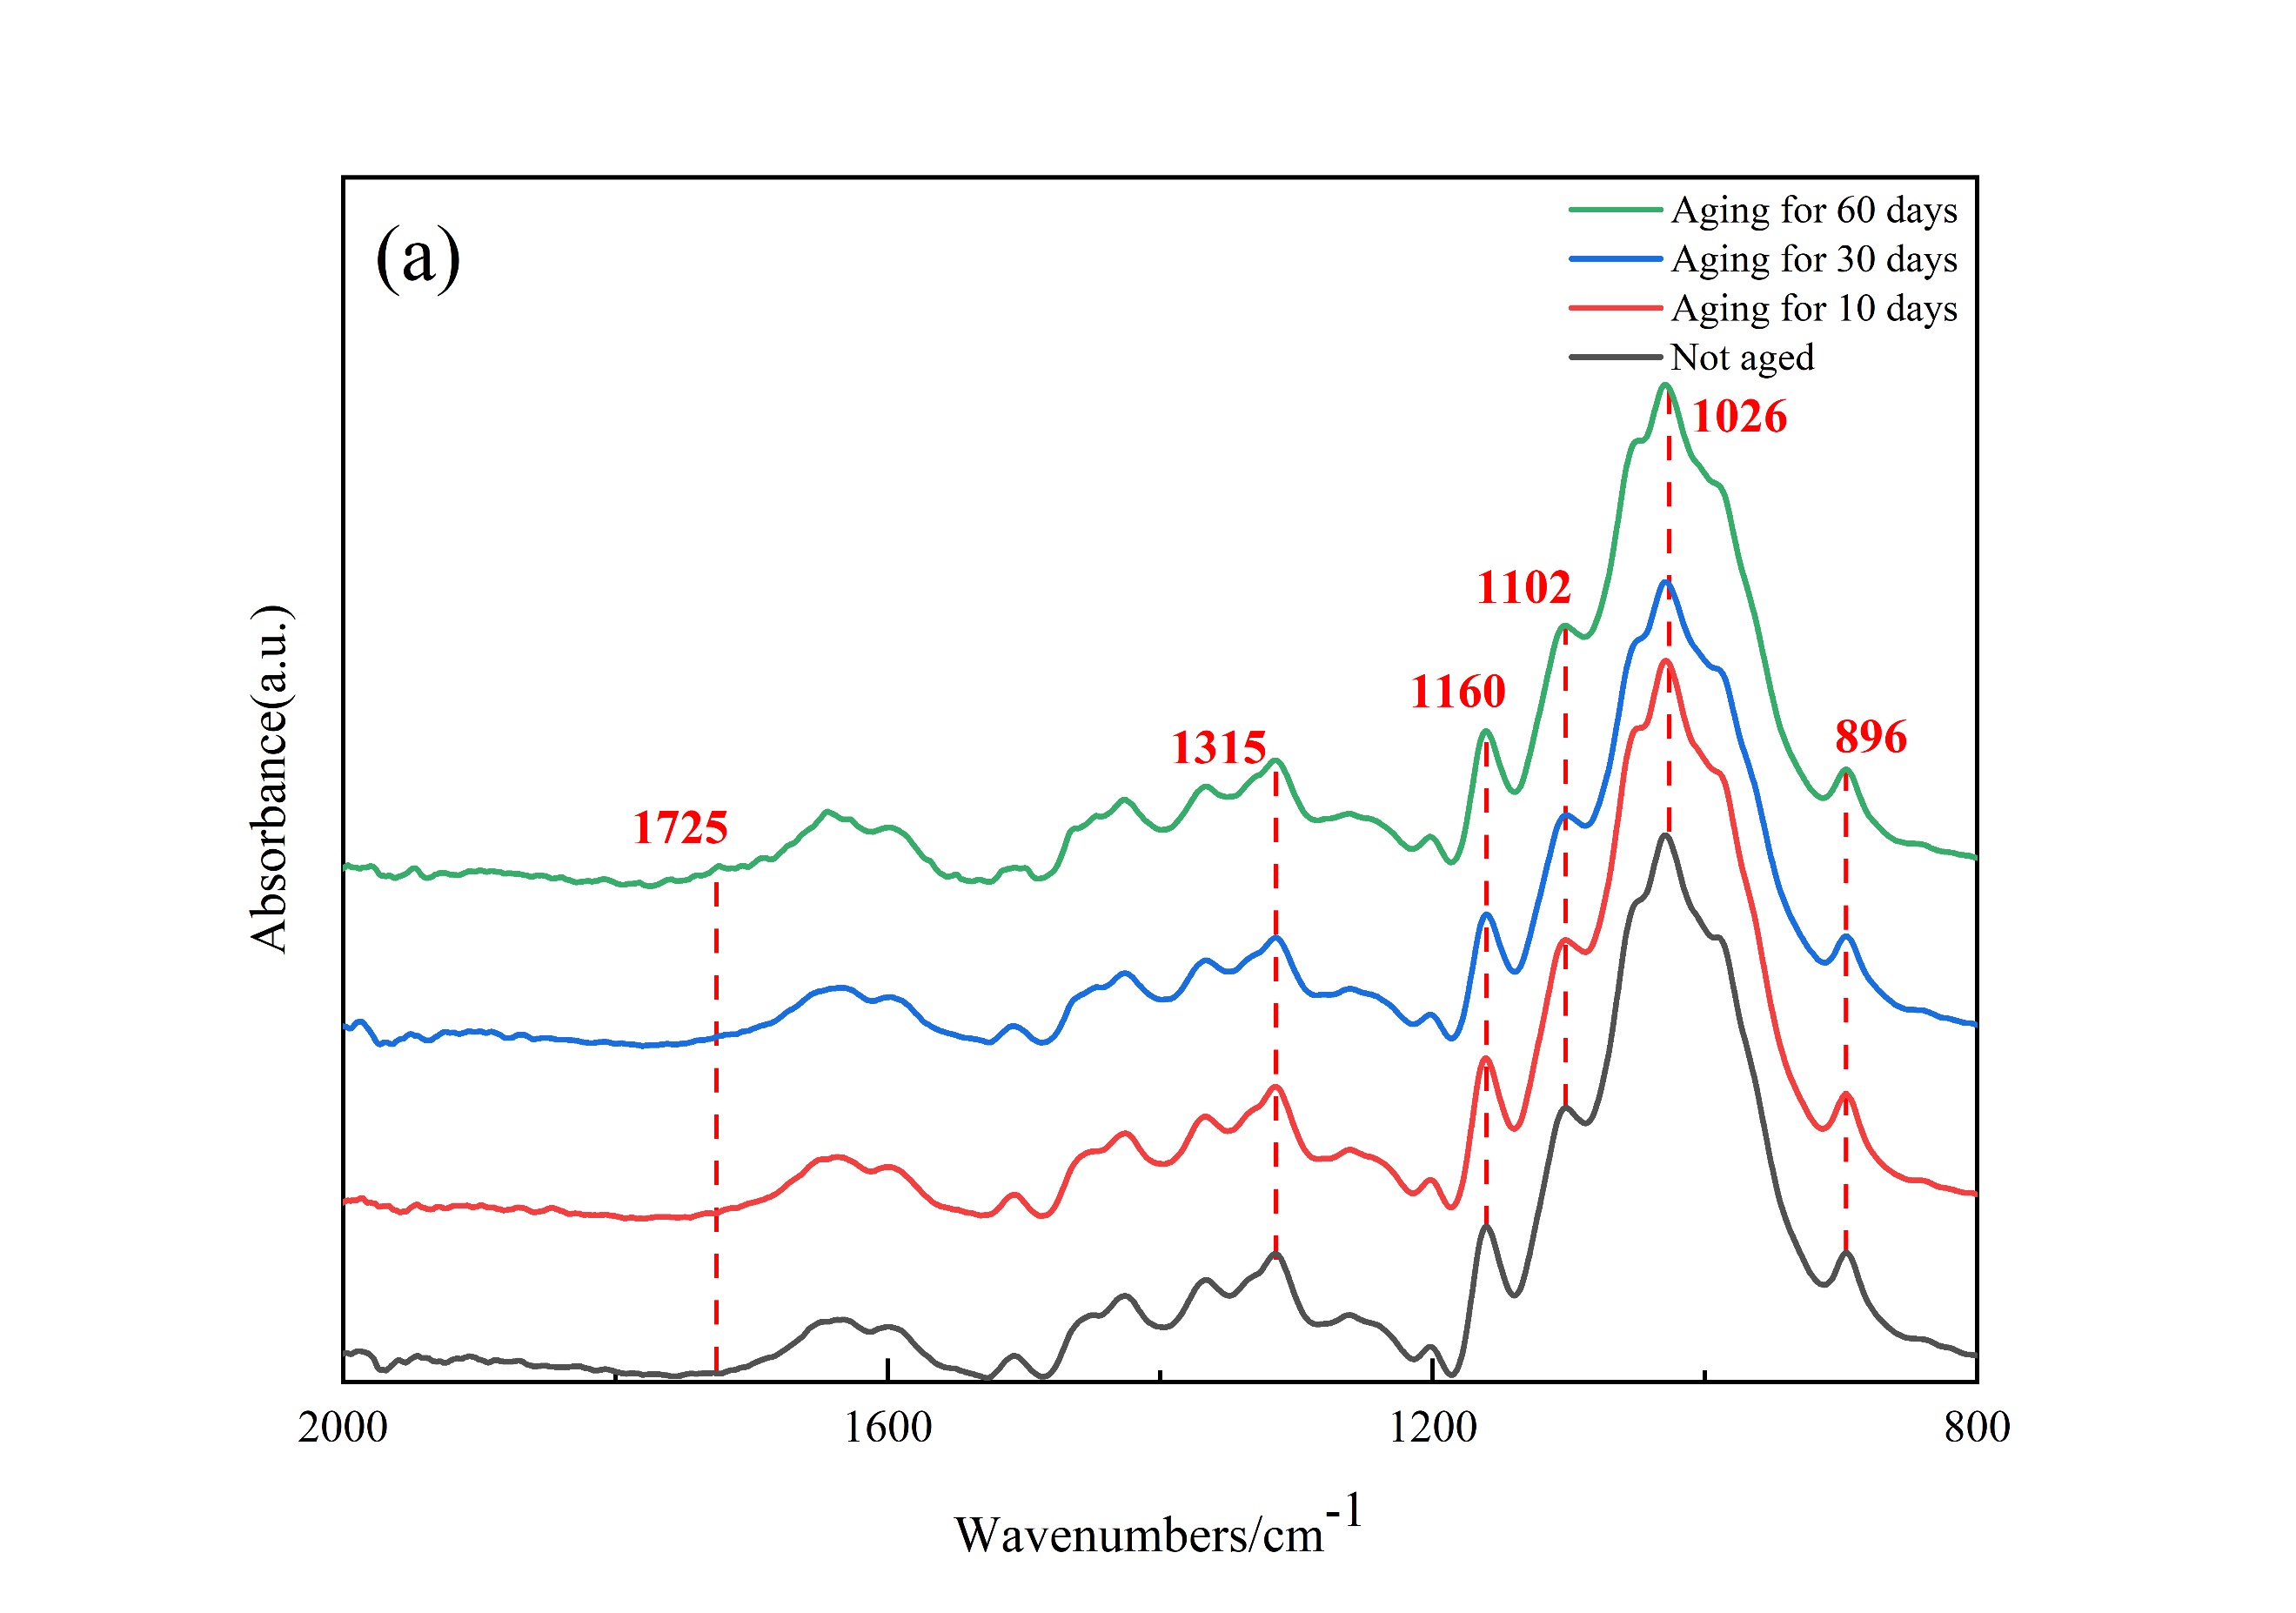

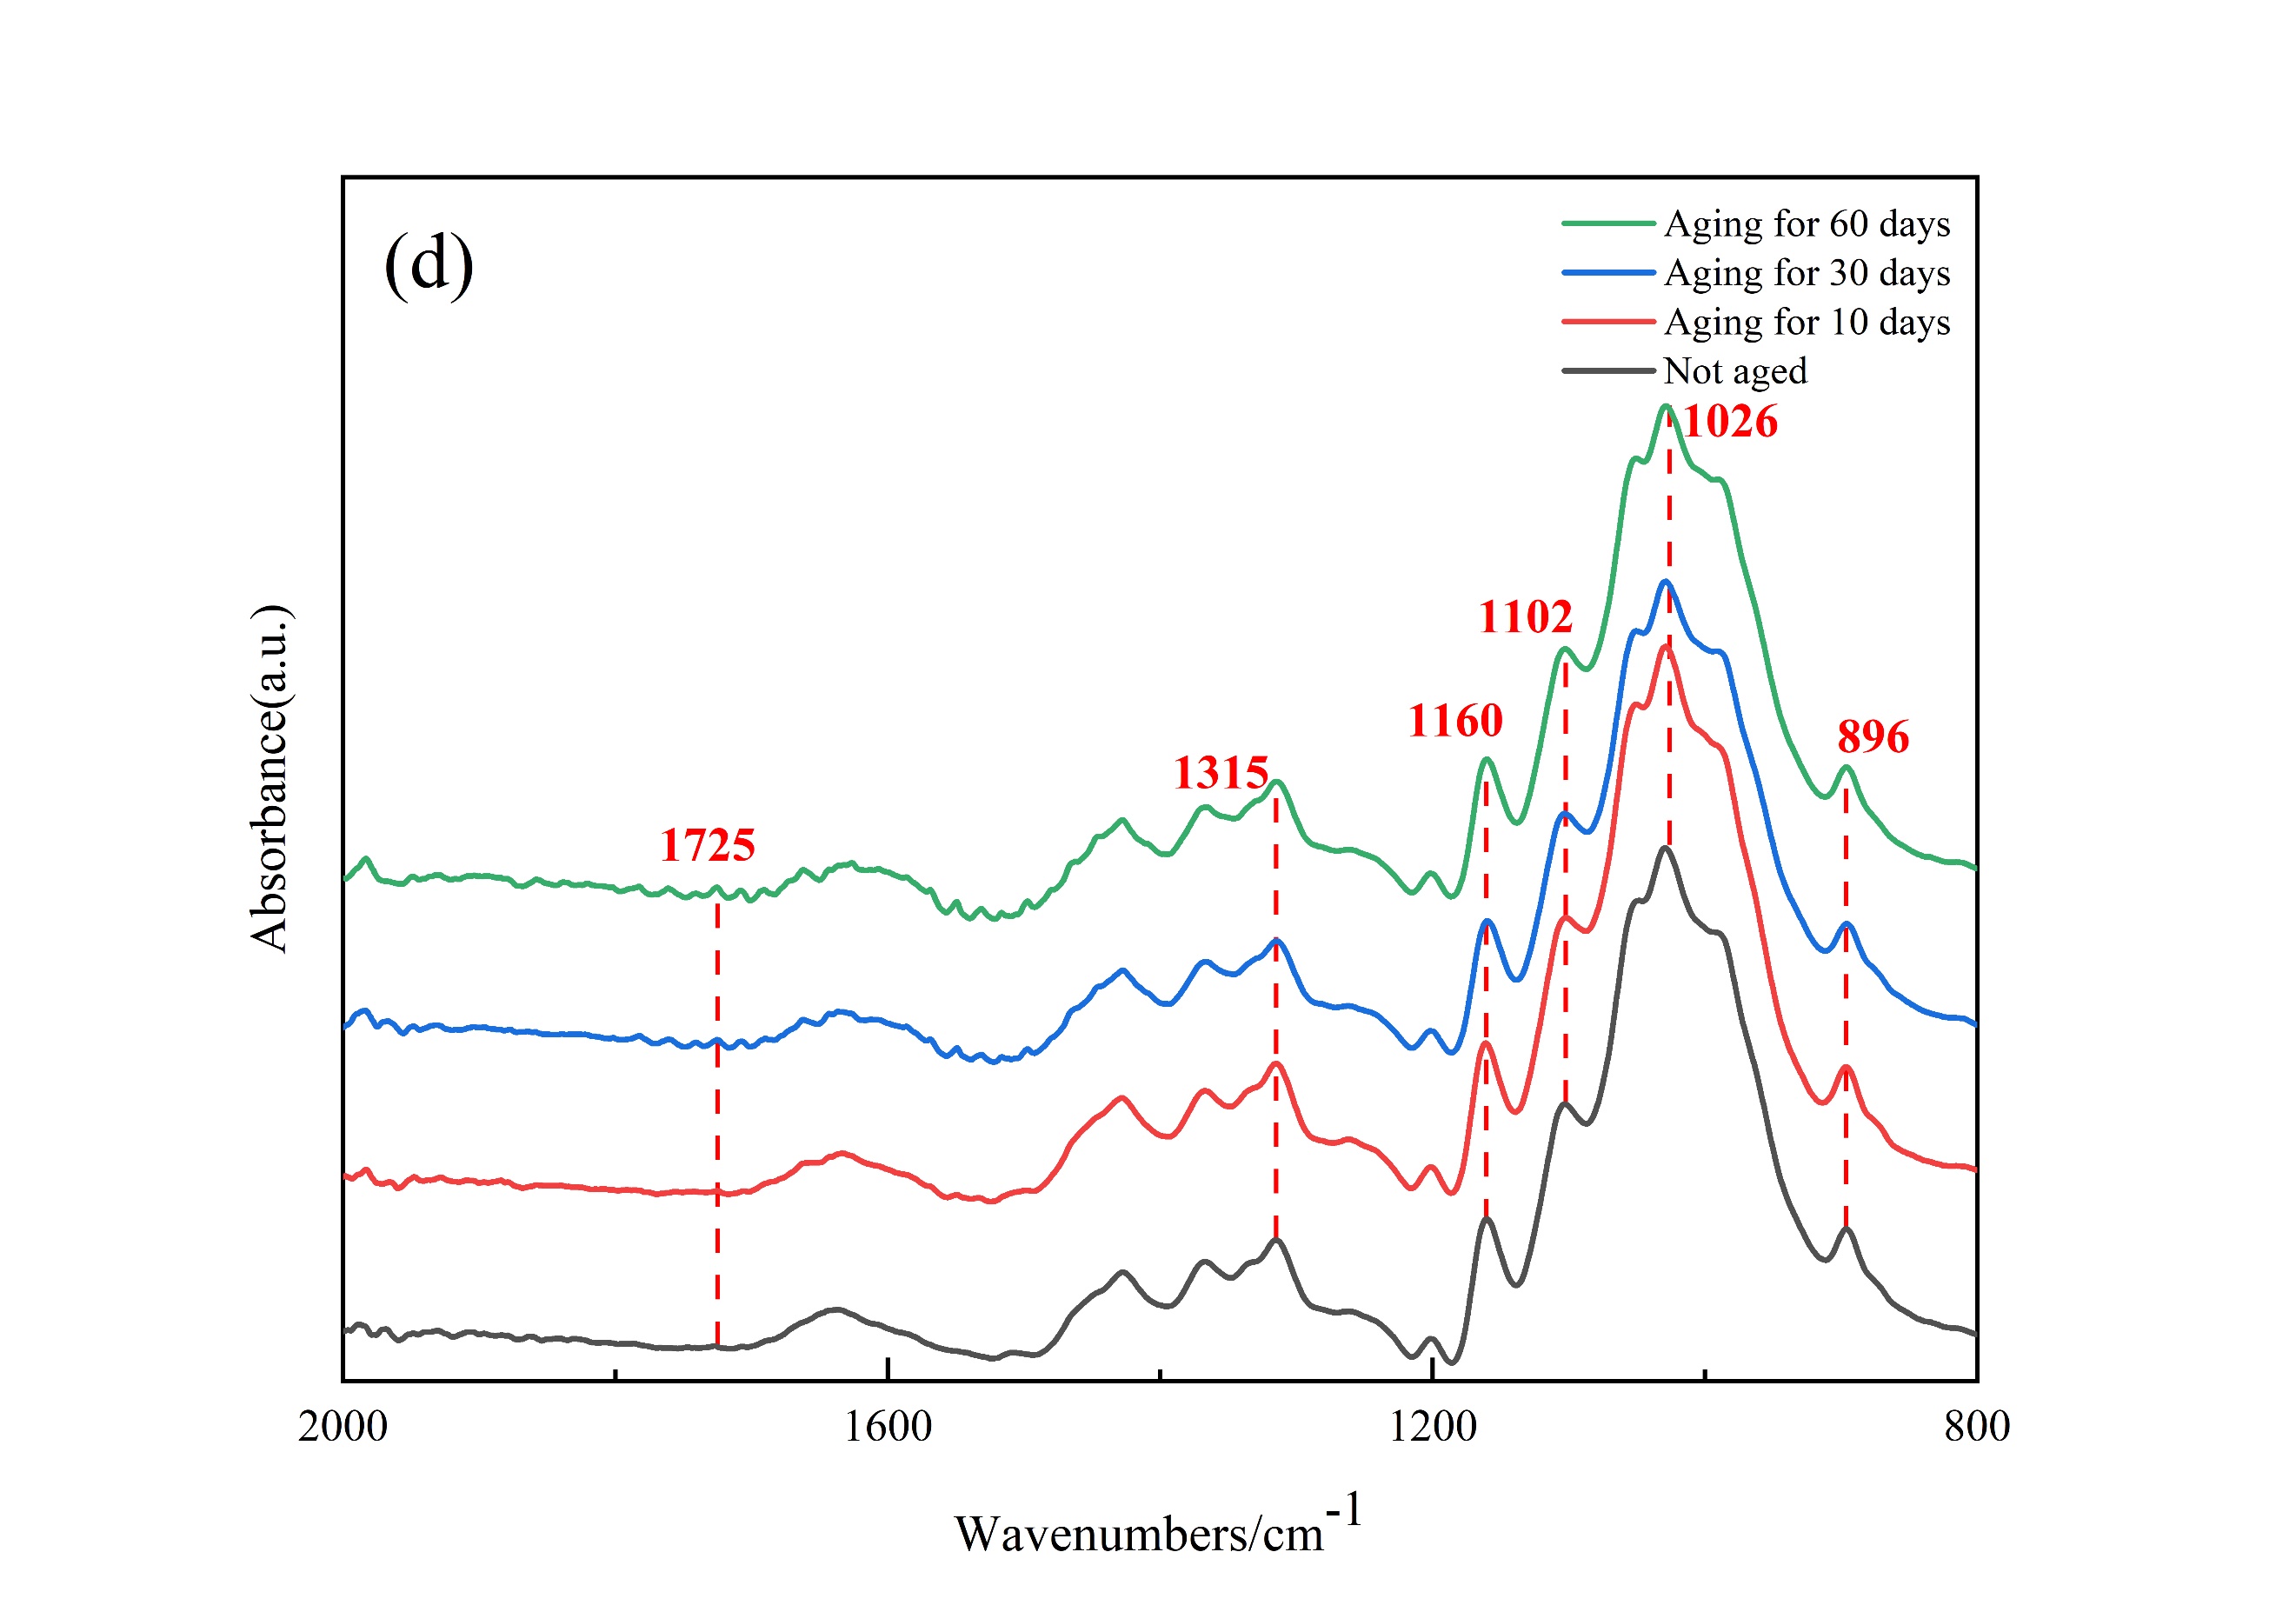

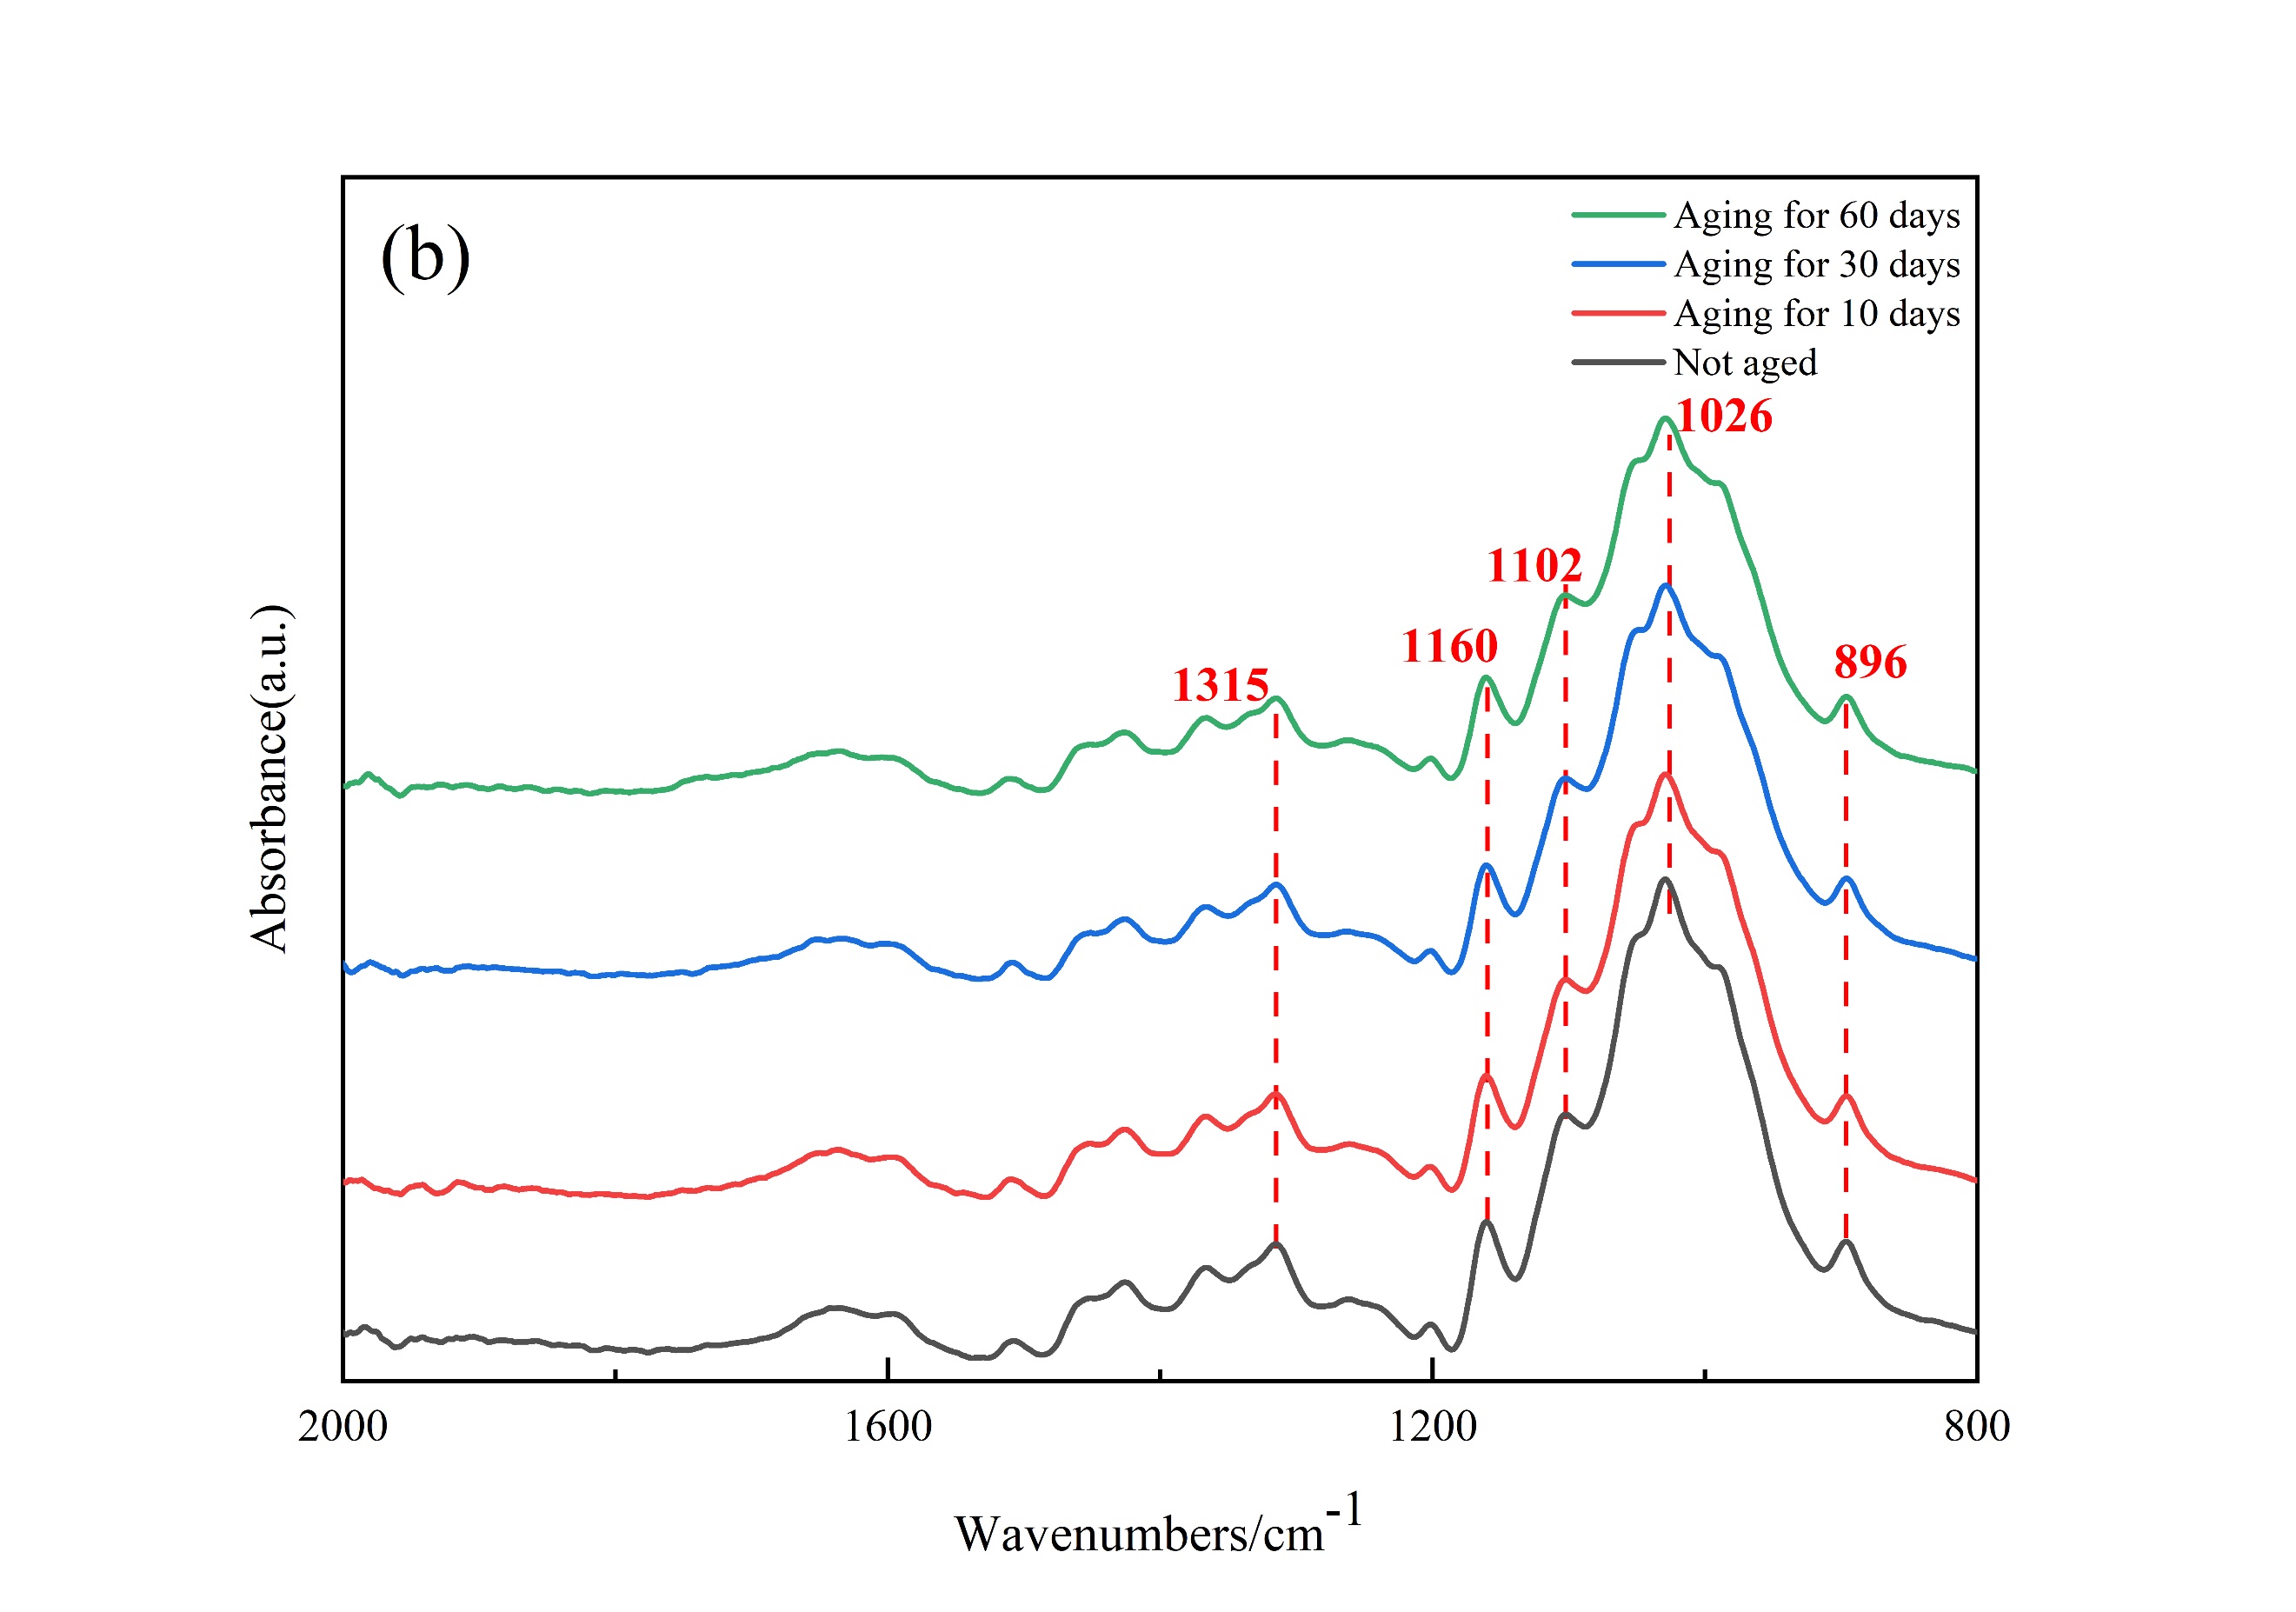


**Fig.S2**. ATR-FTIR spectra of paper samples. (a) Renhua paper，(b) Changting paper1，(c) Changting paper2，(d) Panxian paper，(e) Fuyang paper，(f) Liancheng paper.


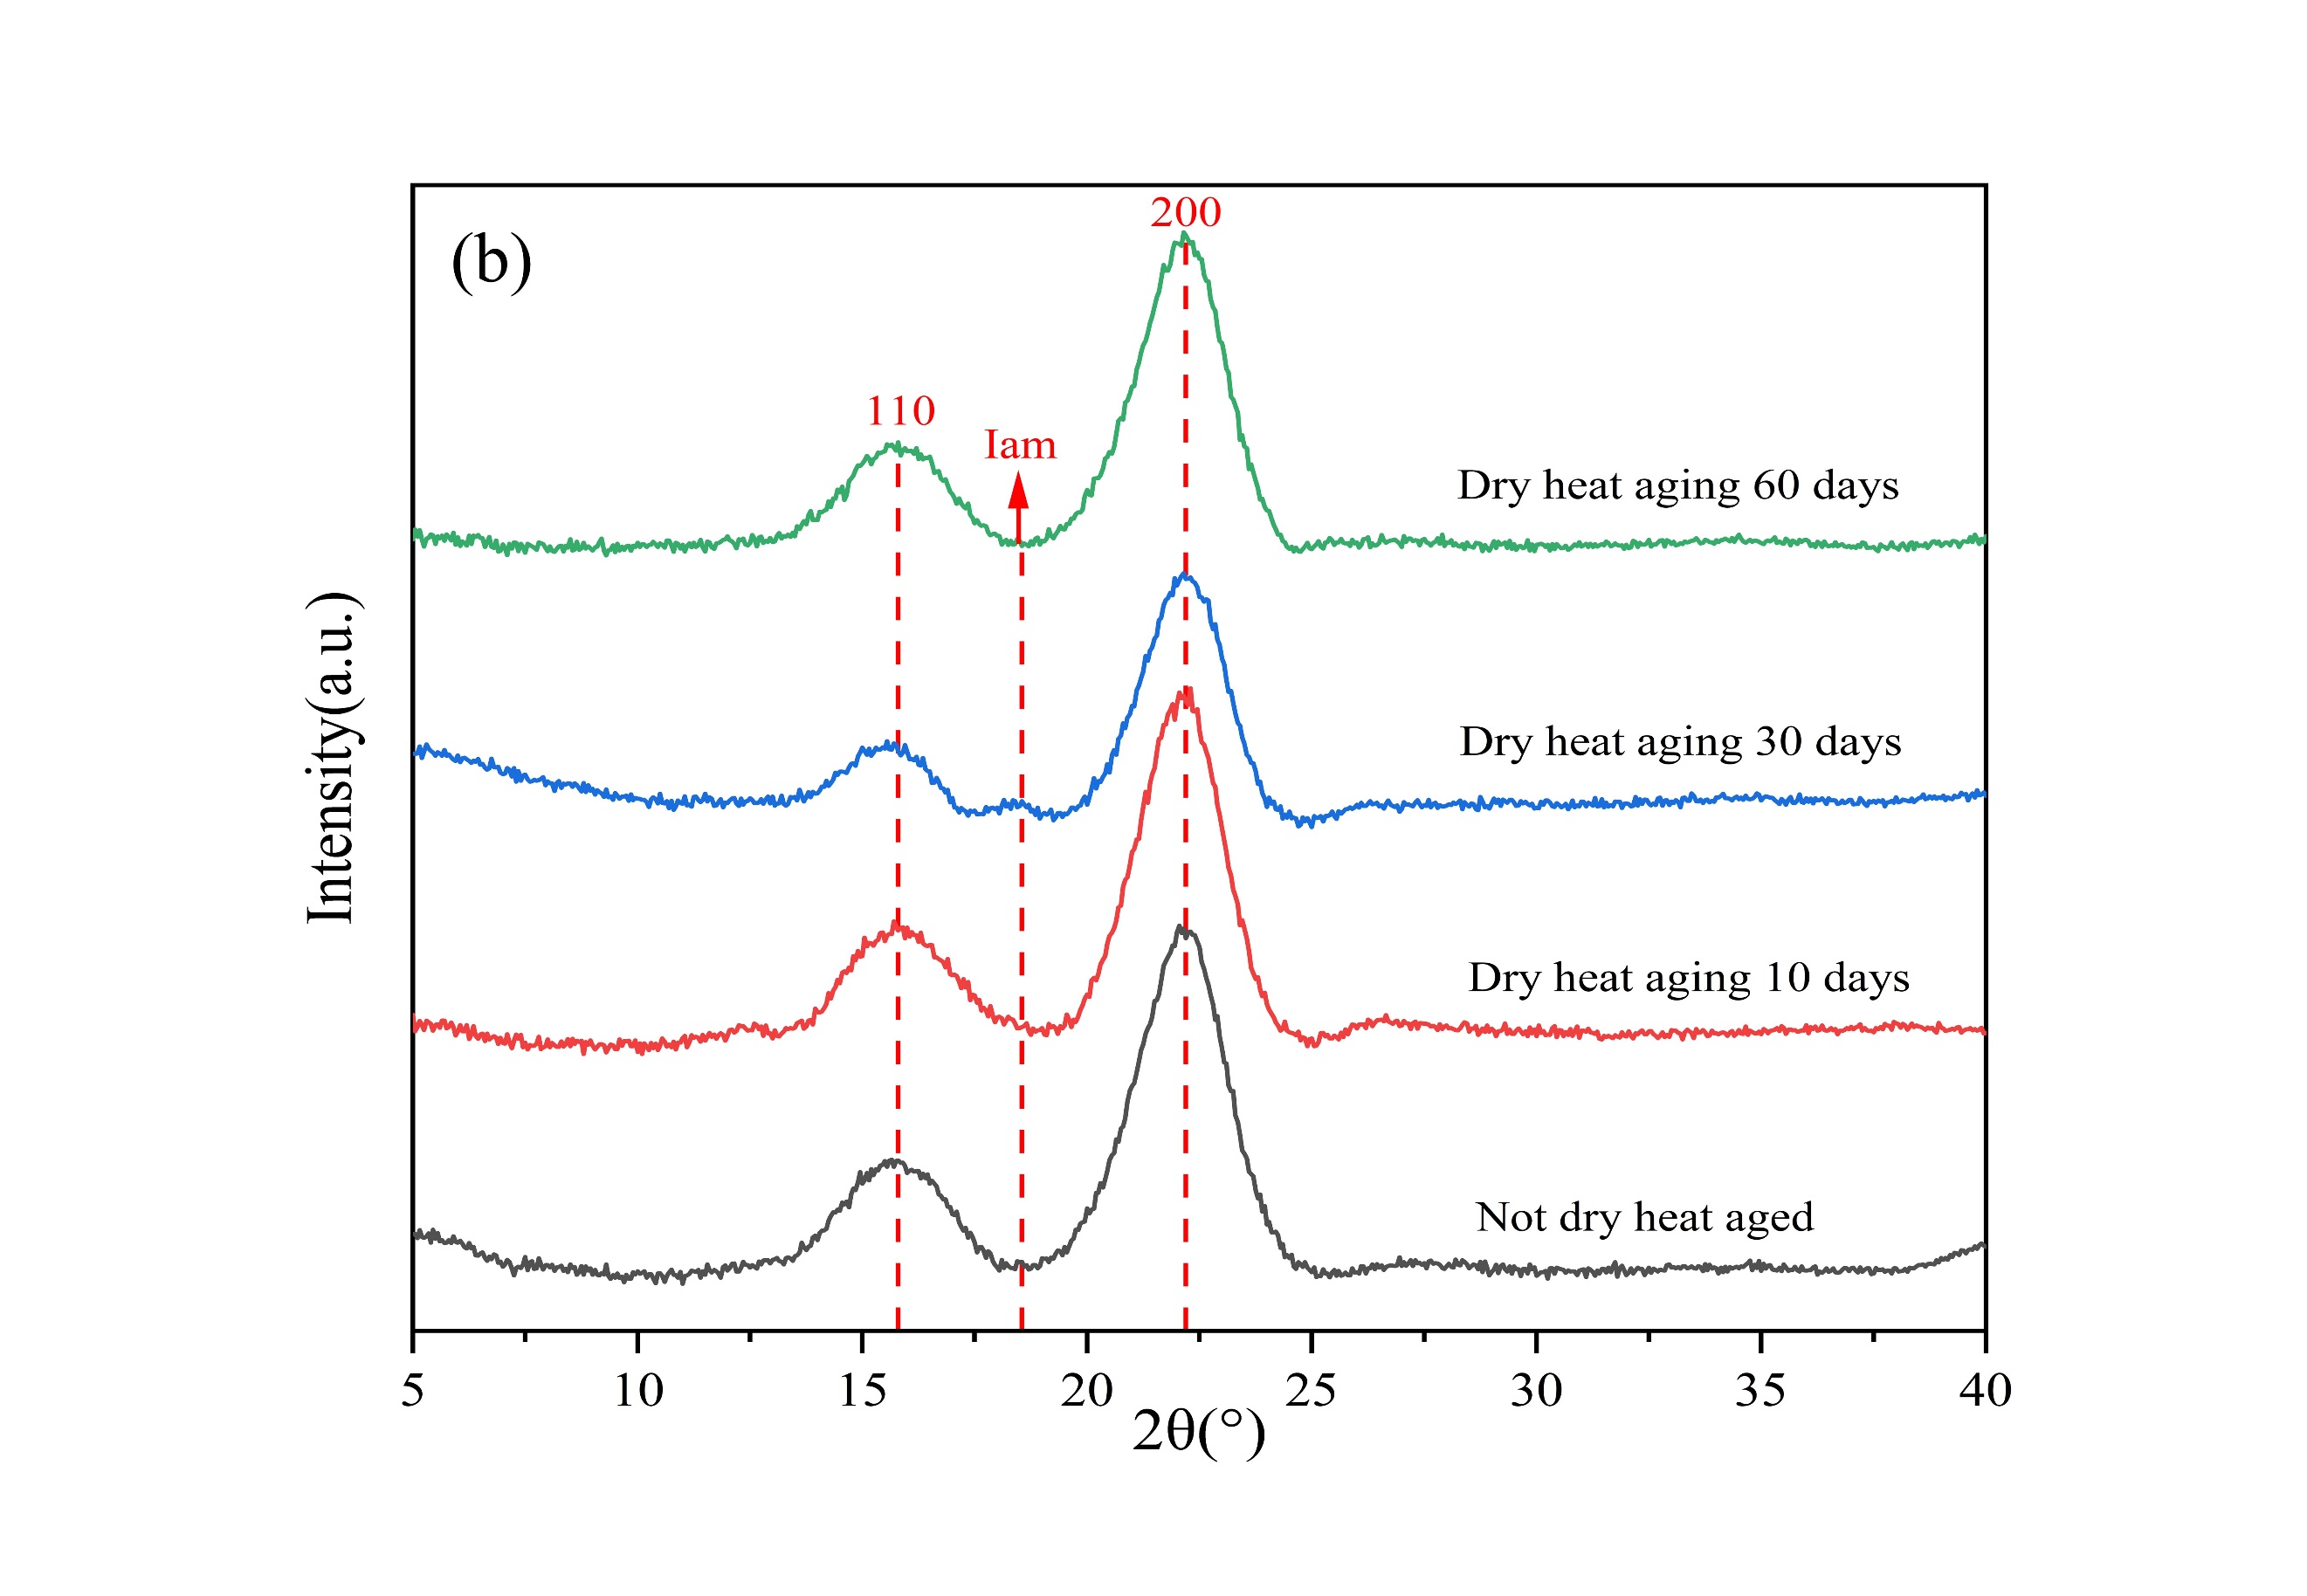

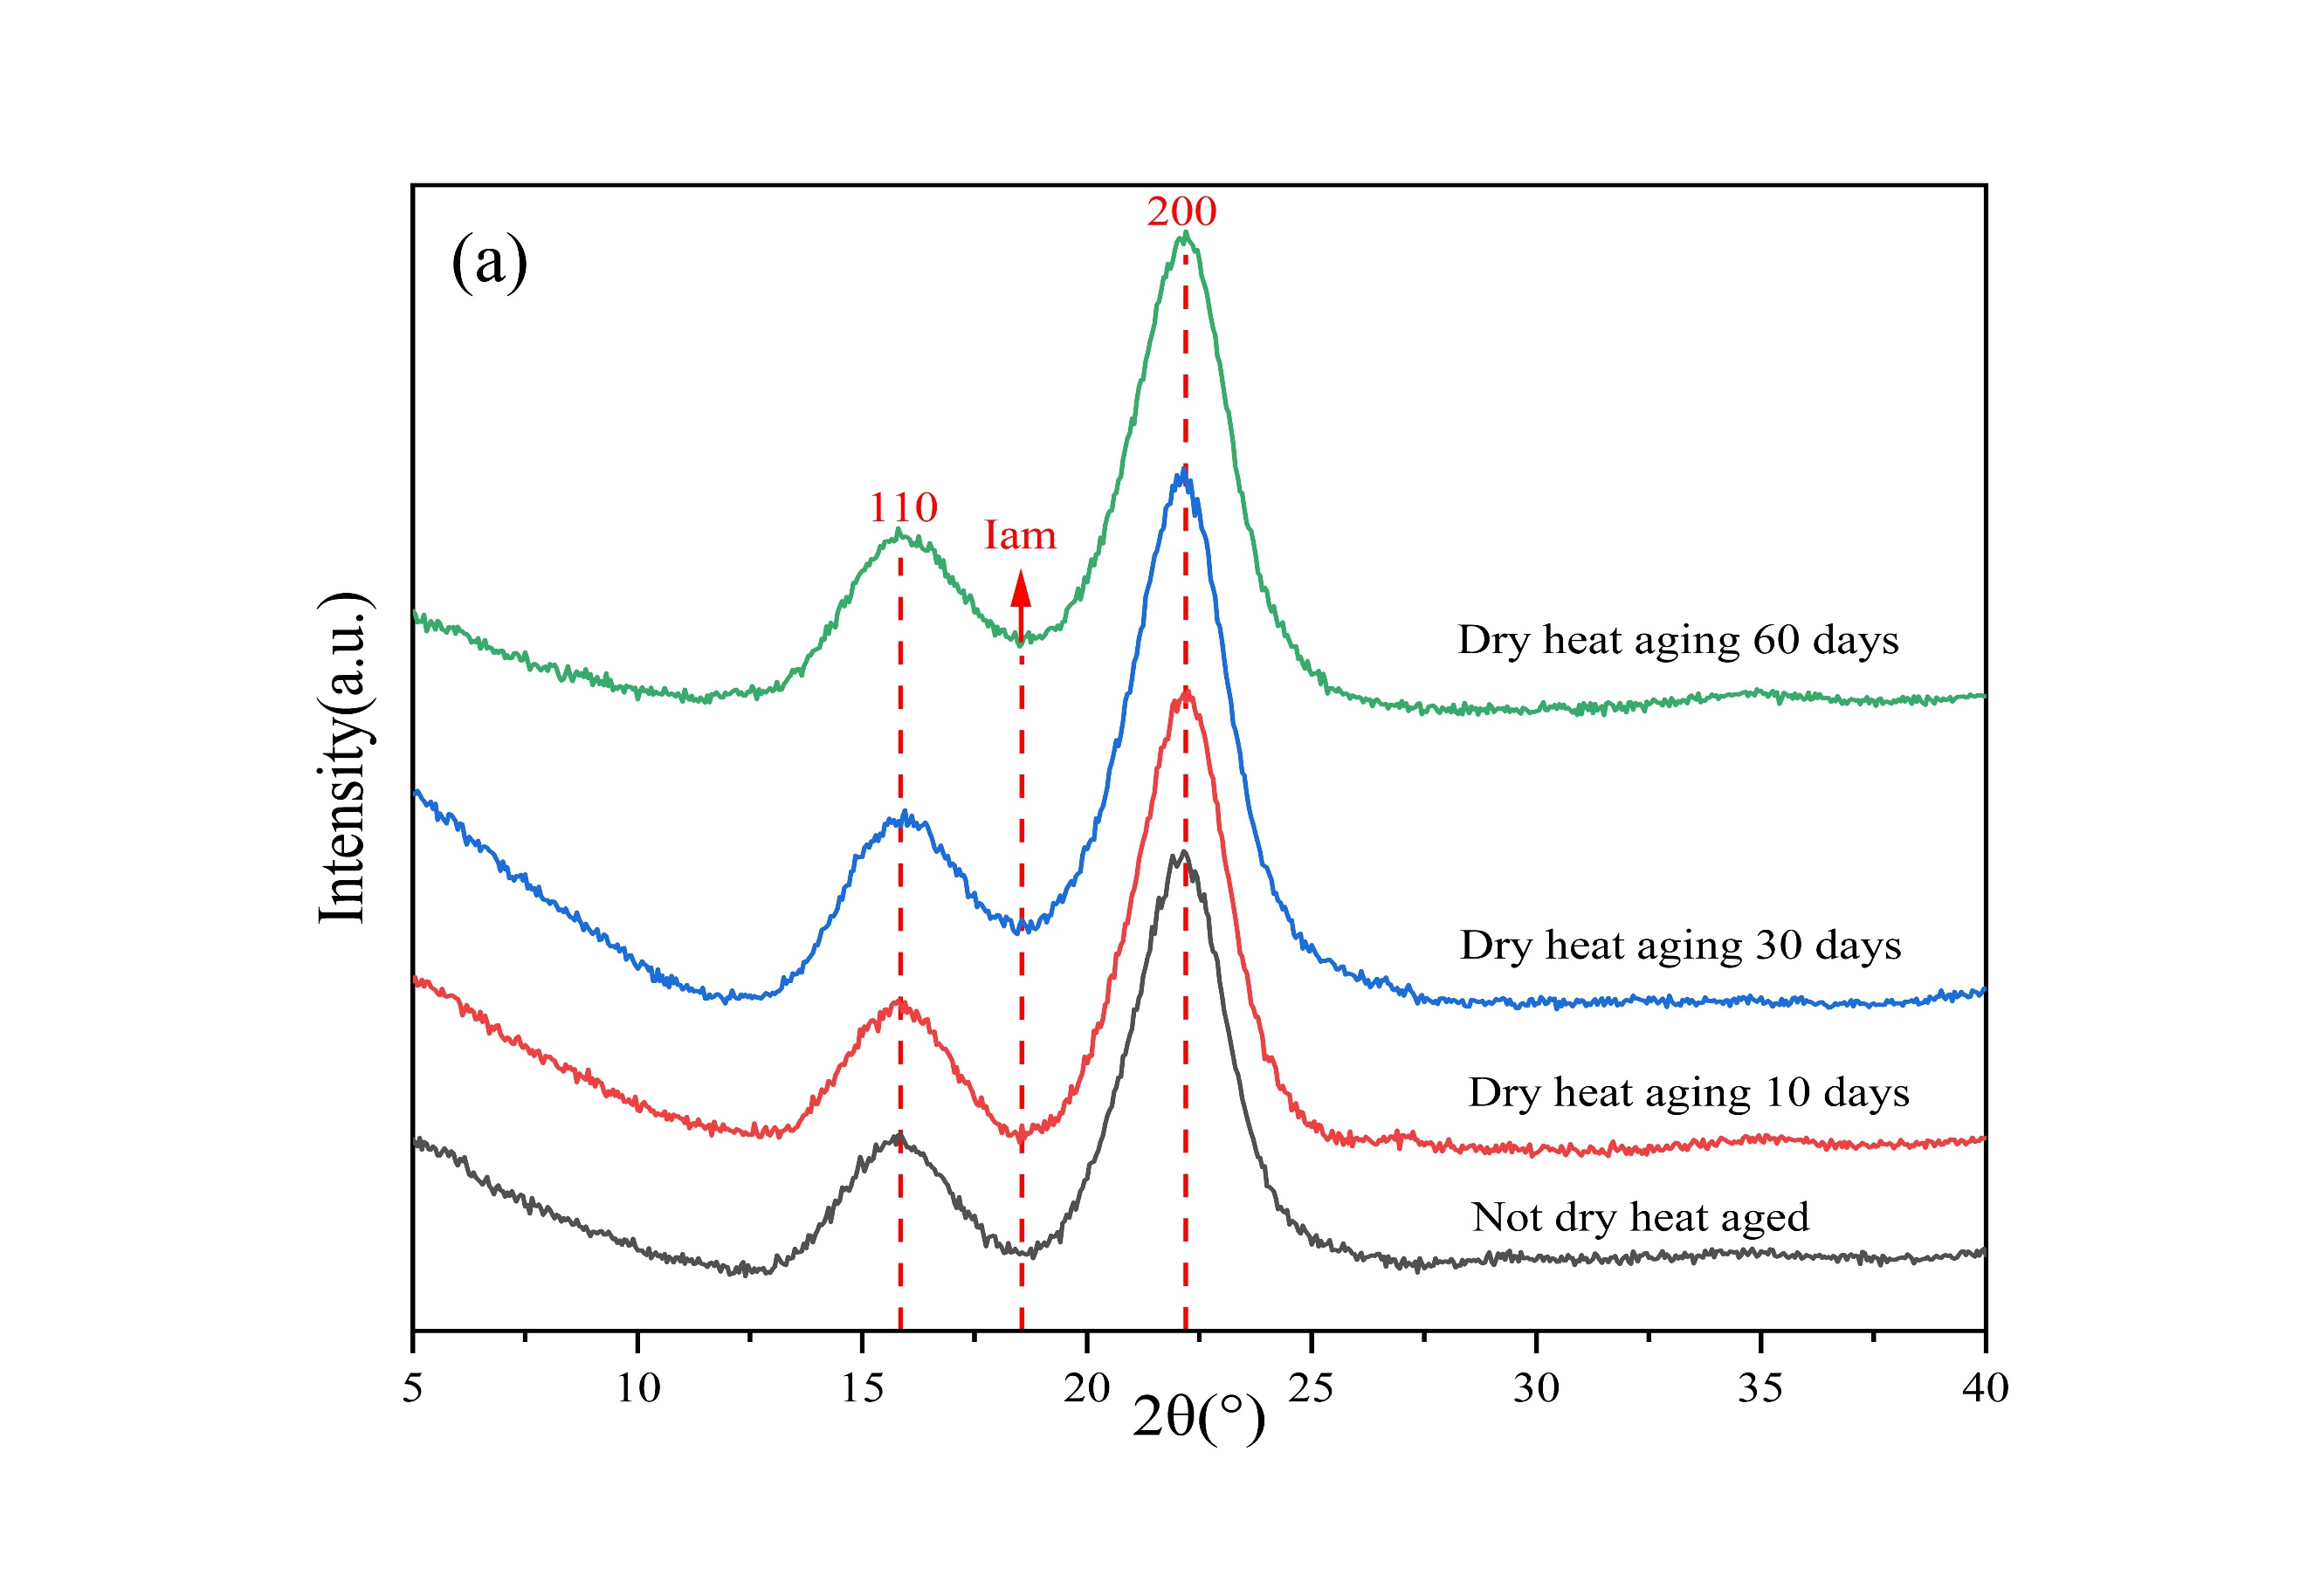

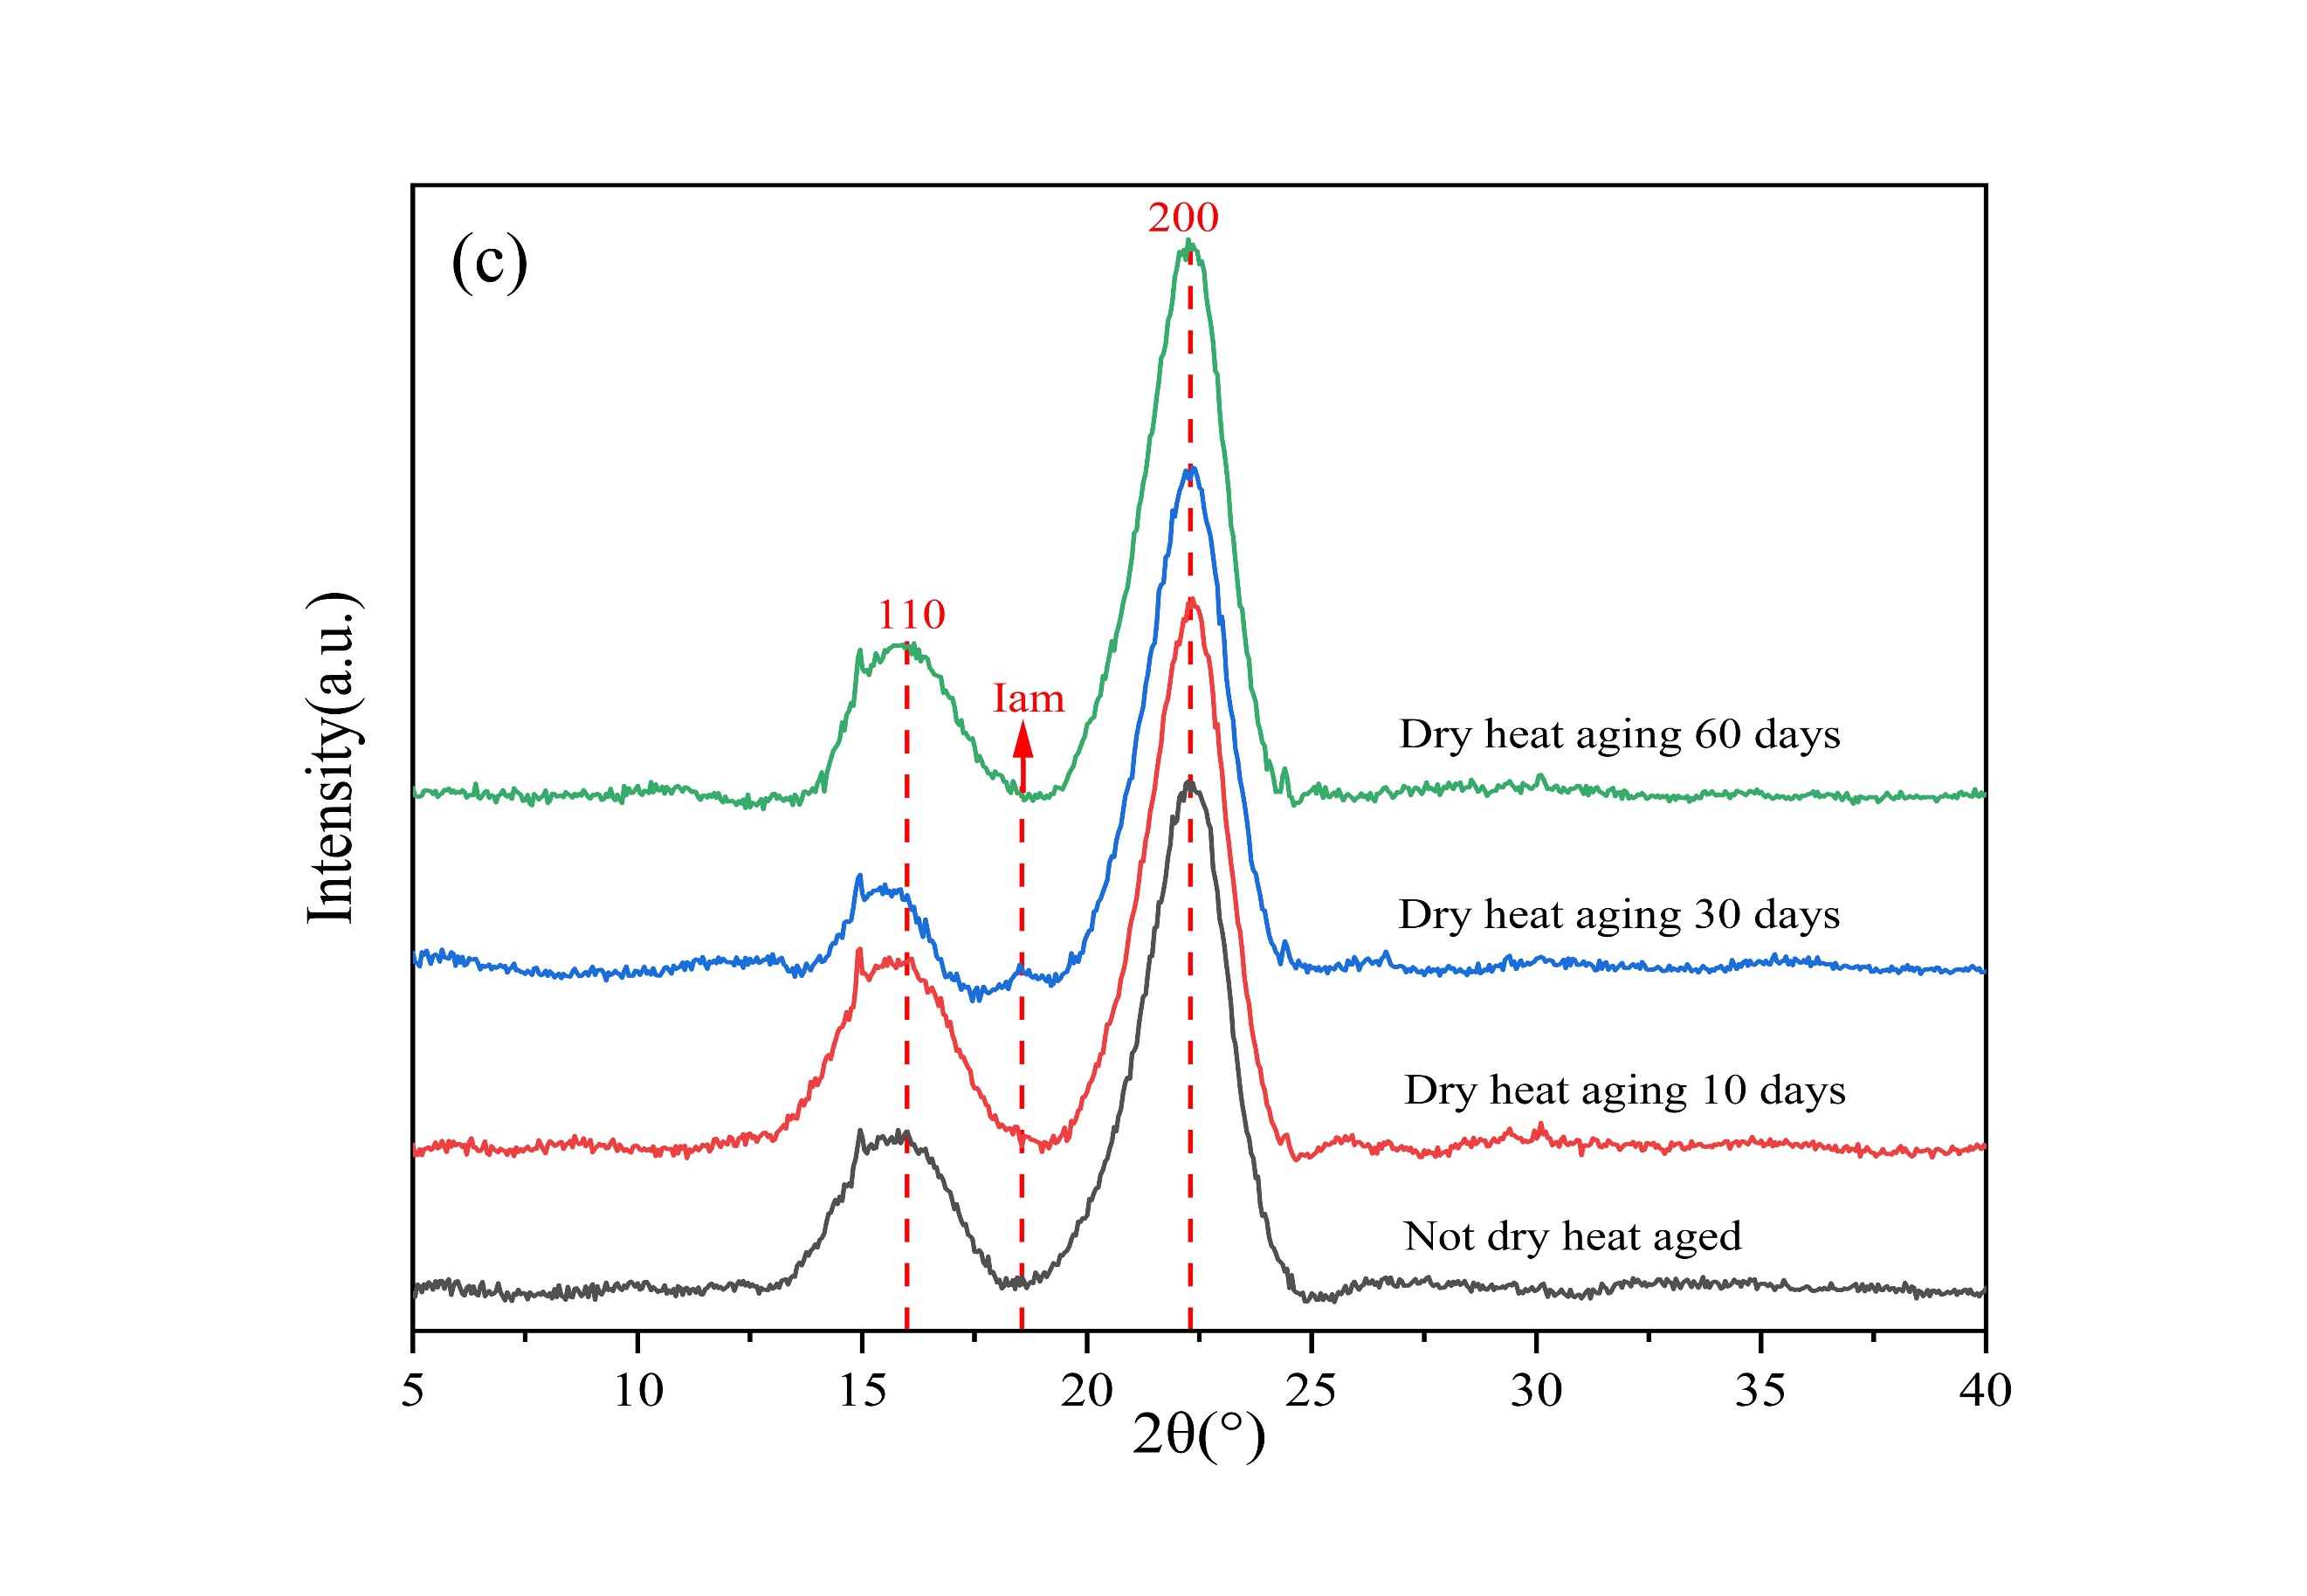

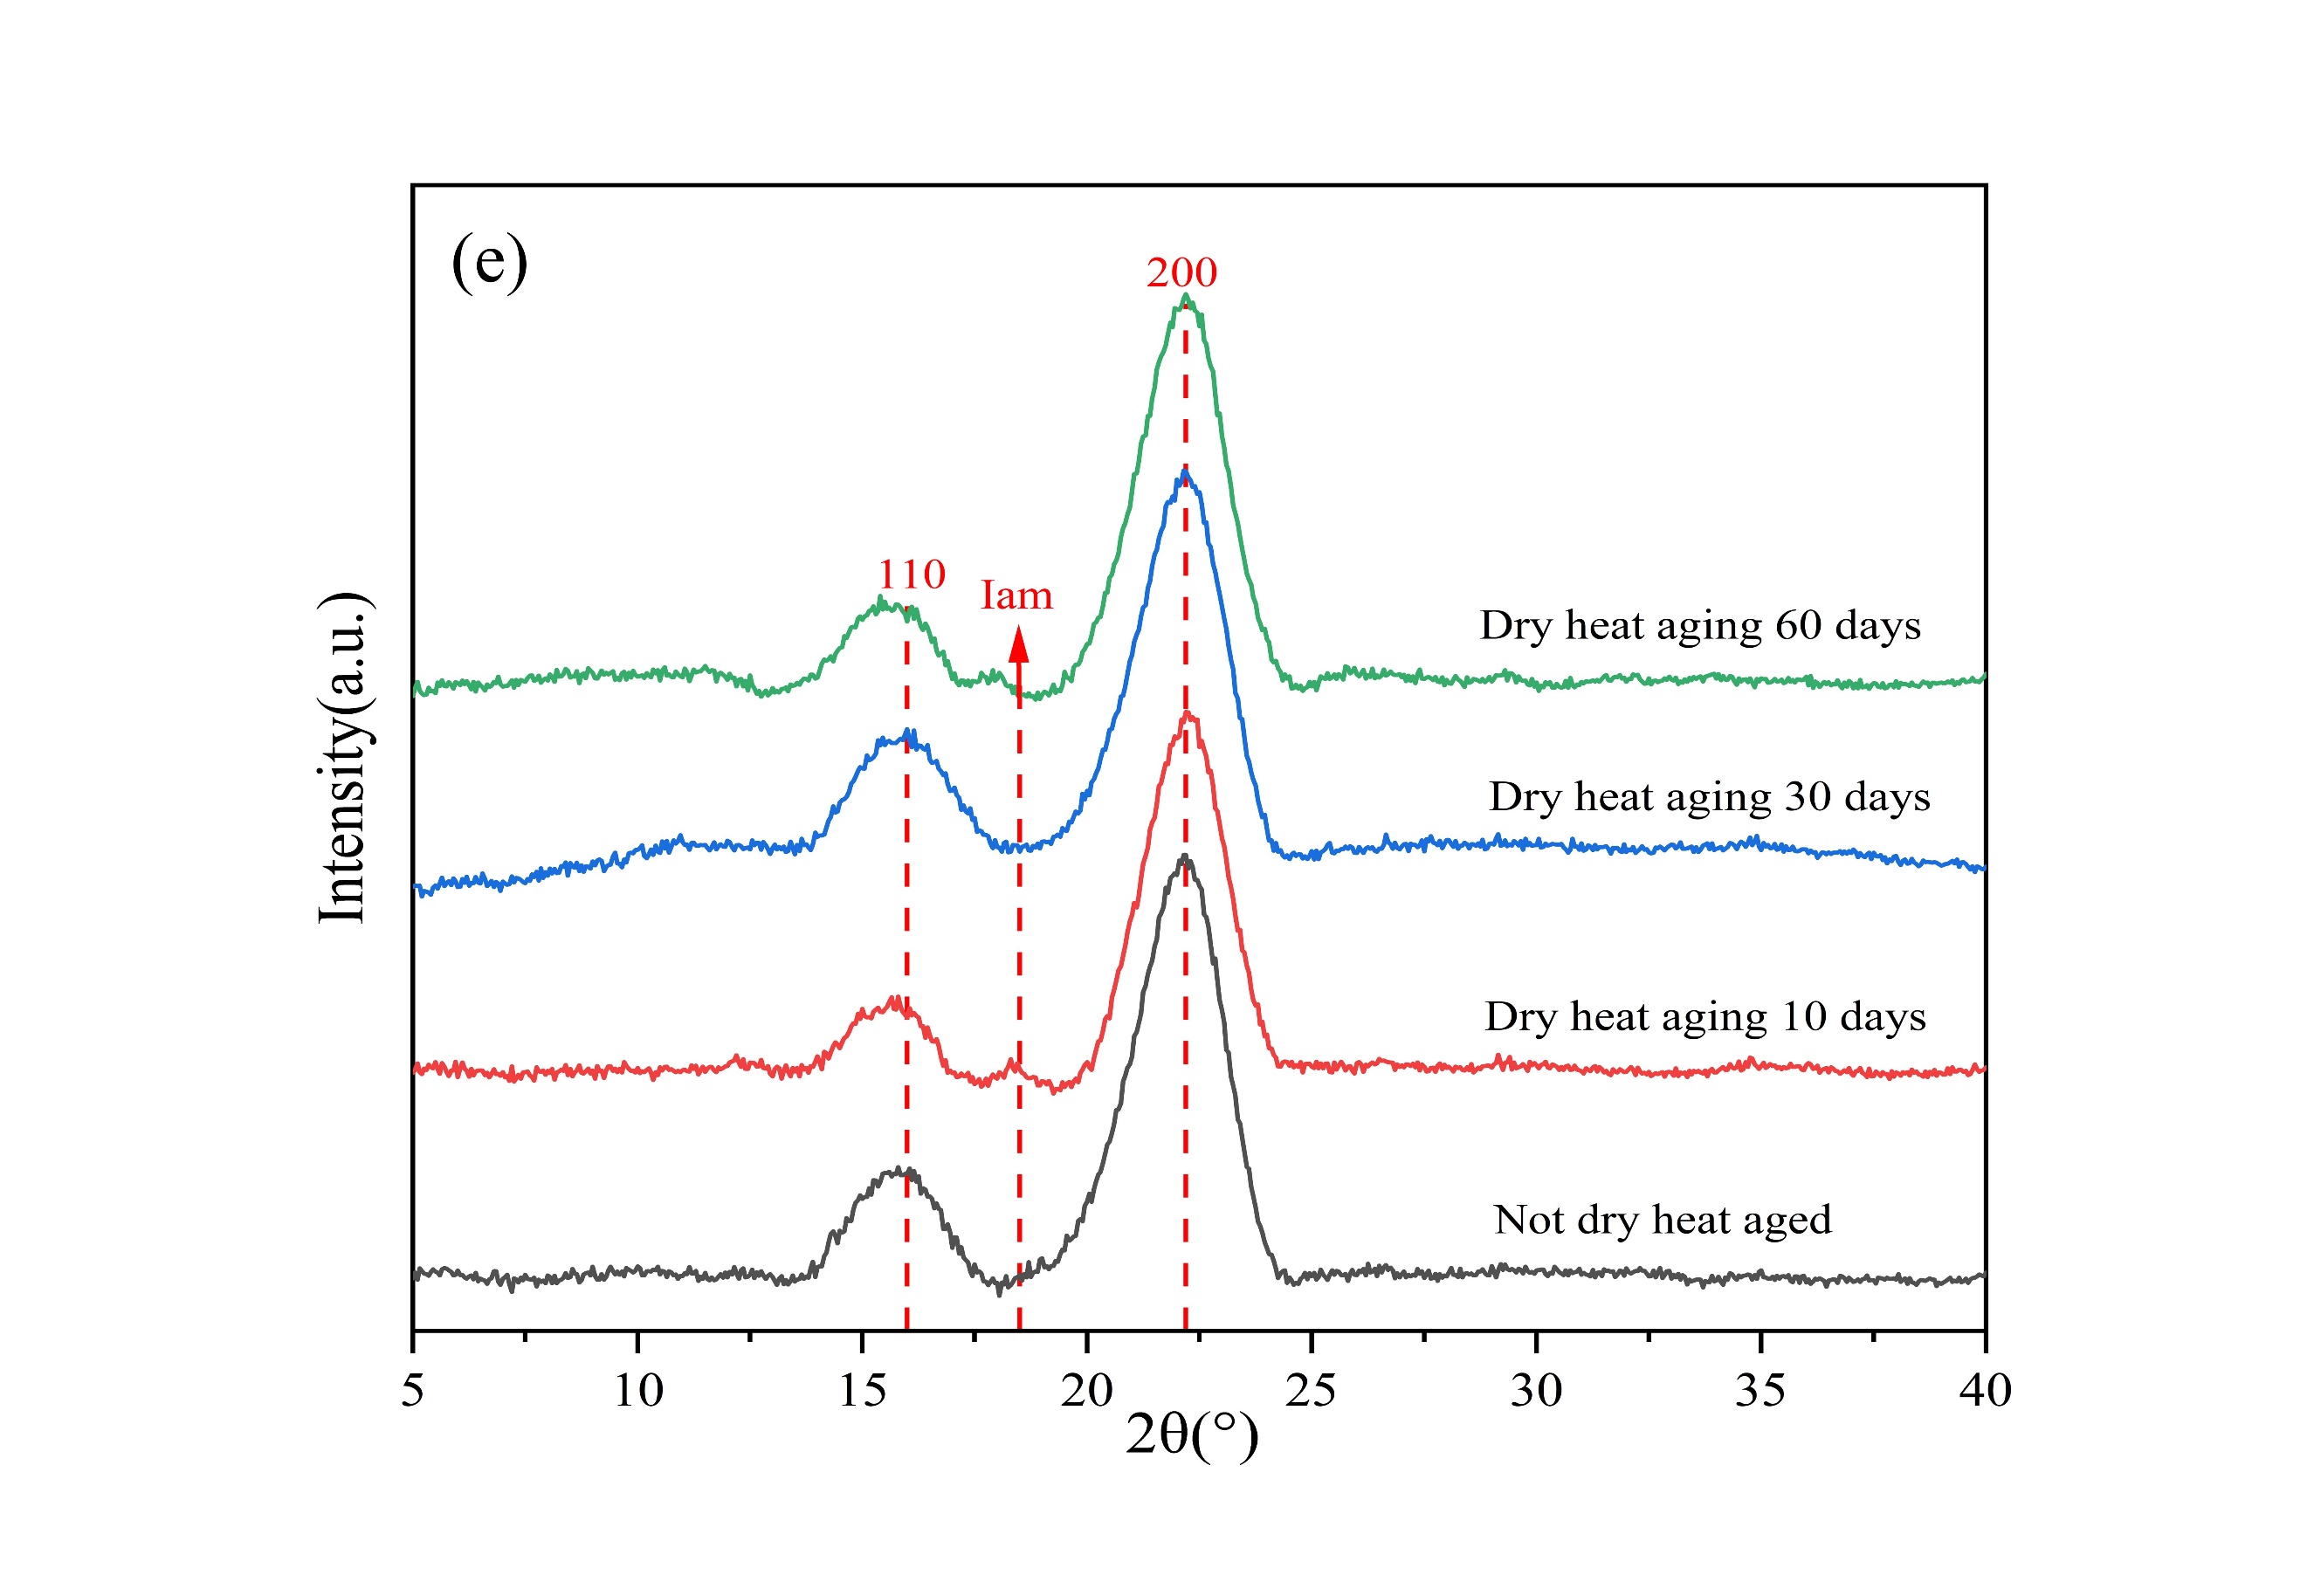

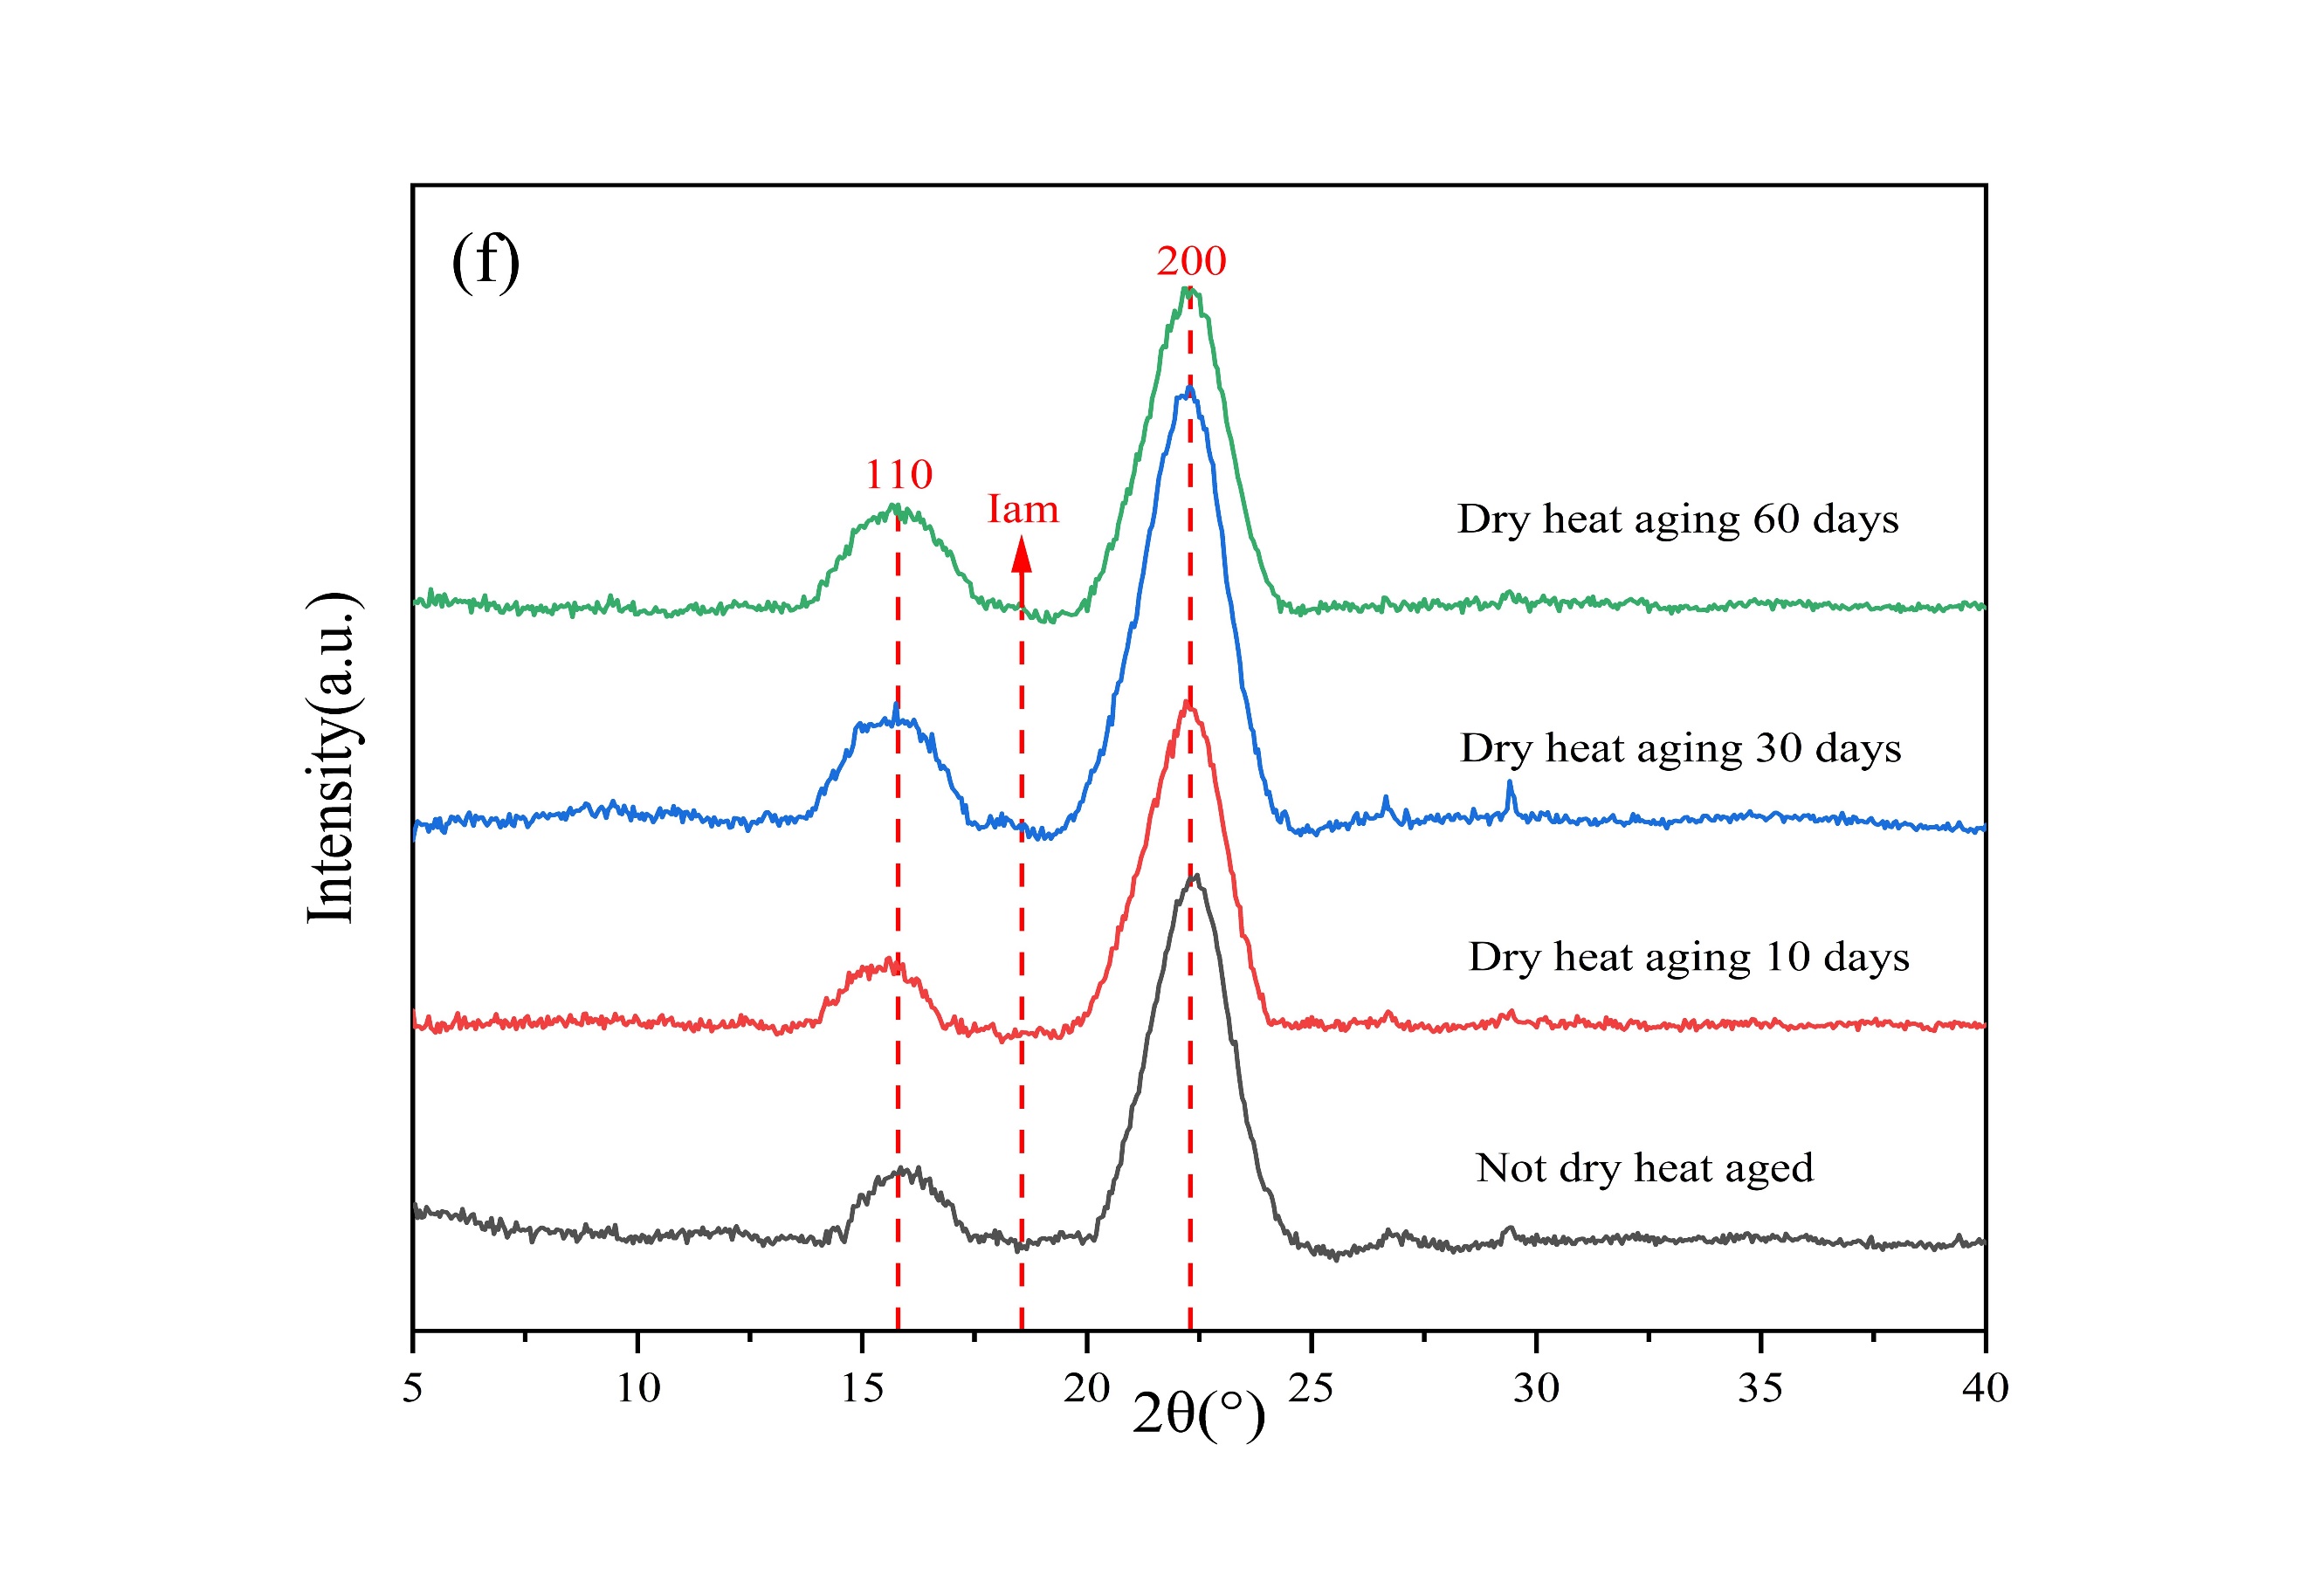

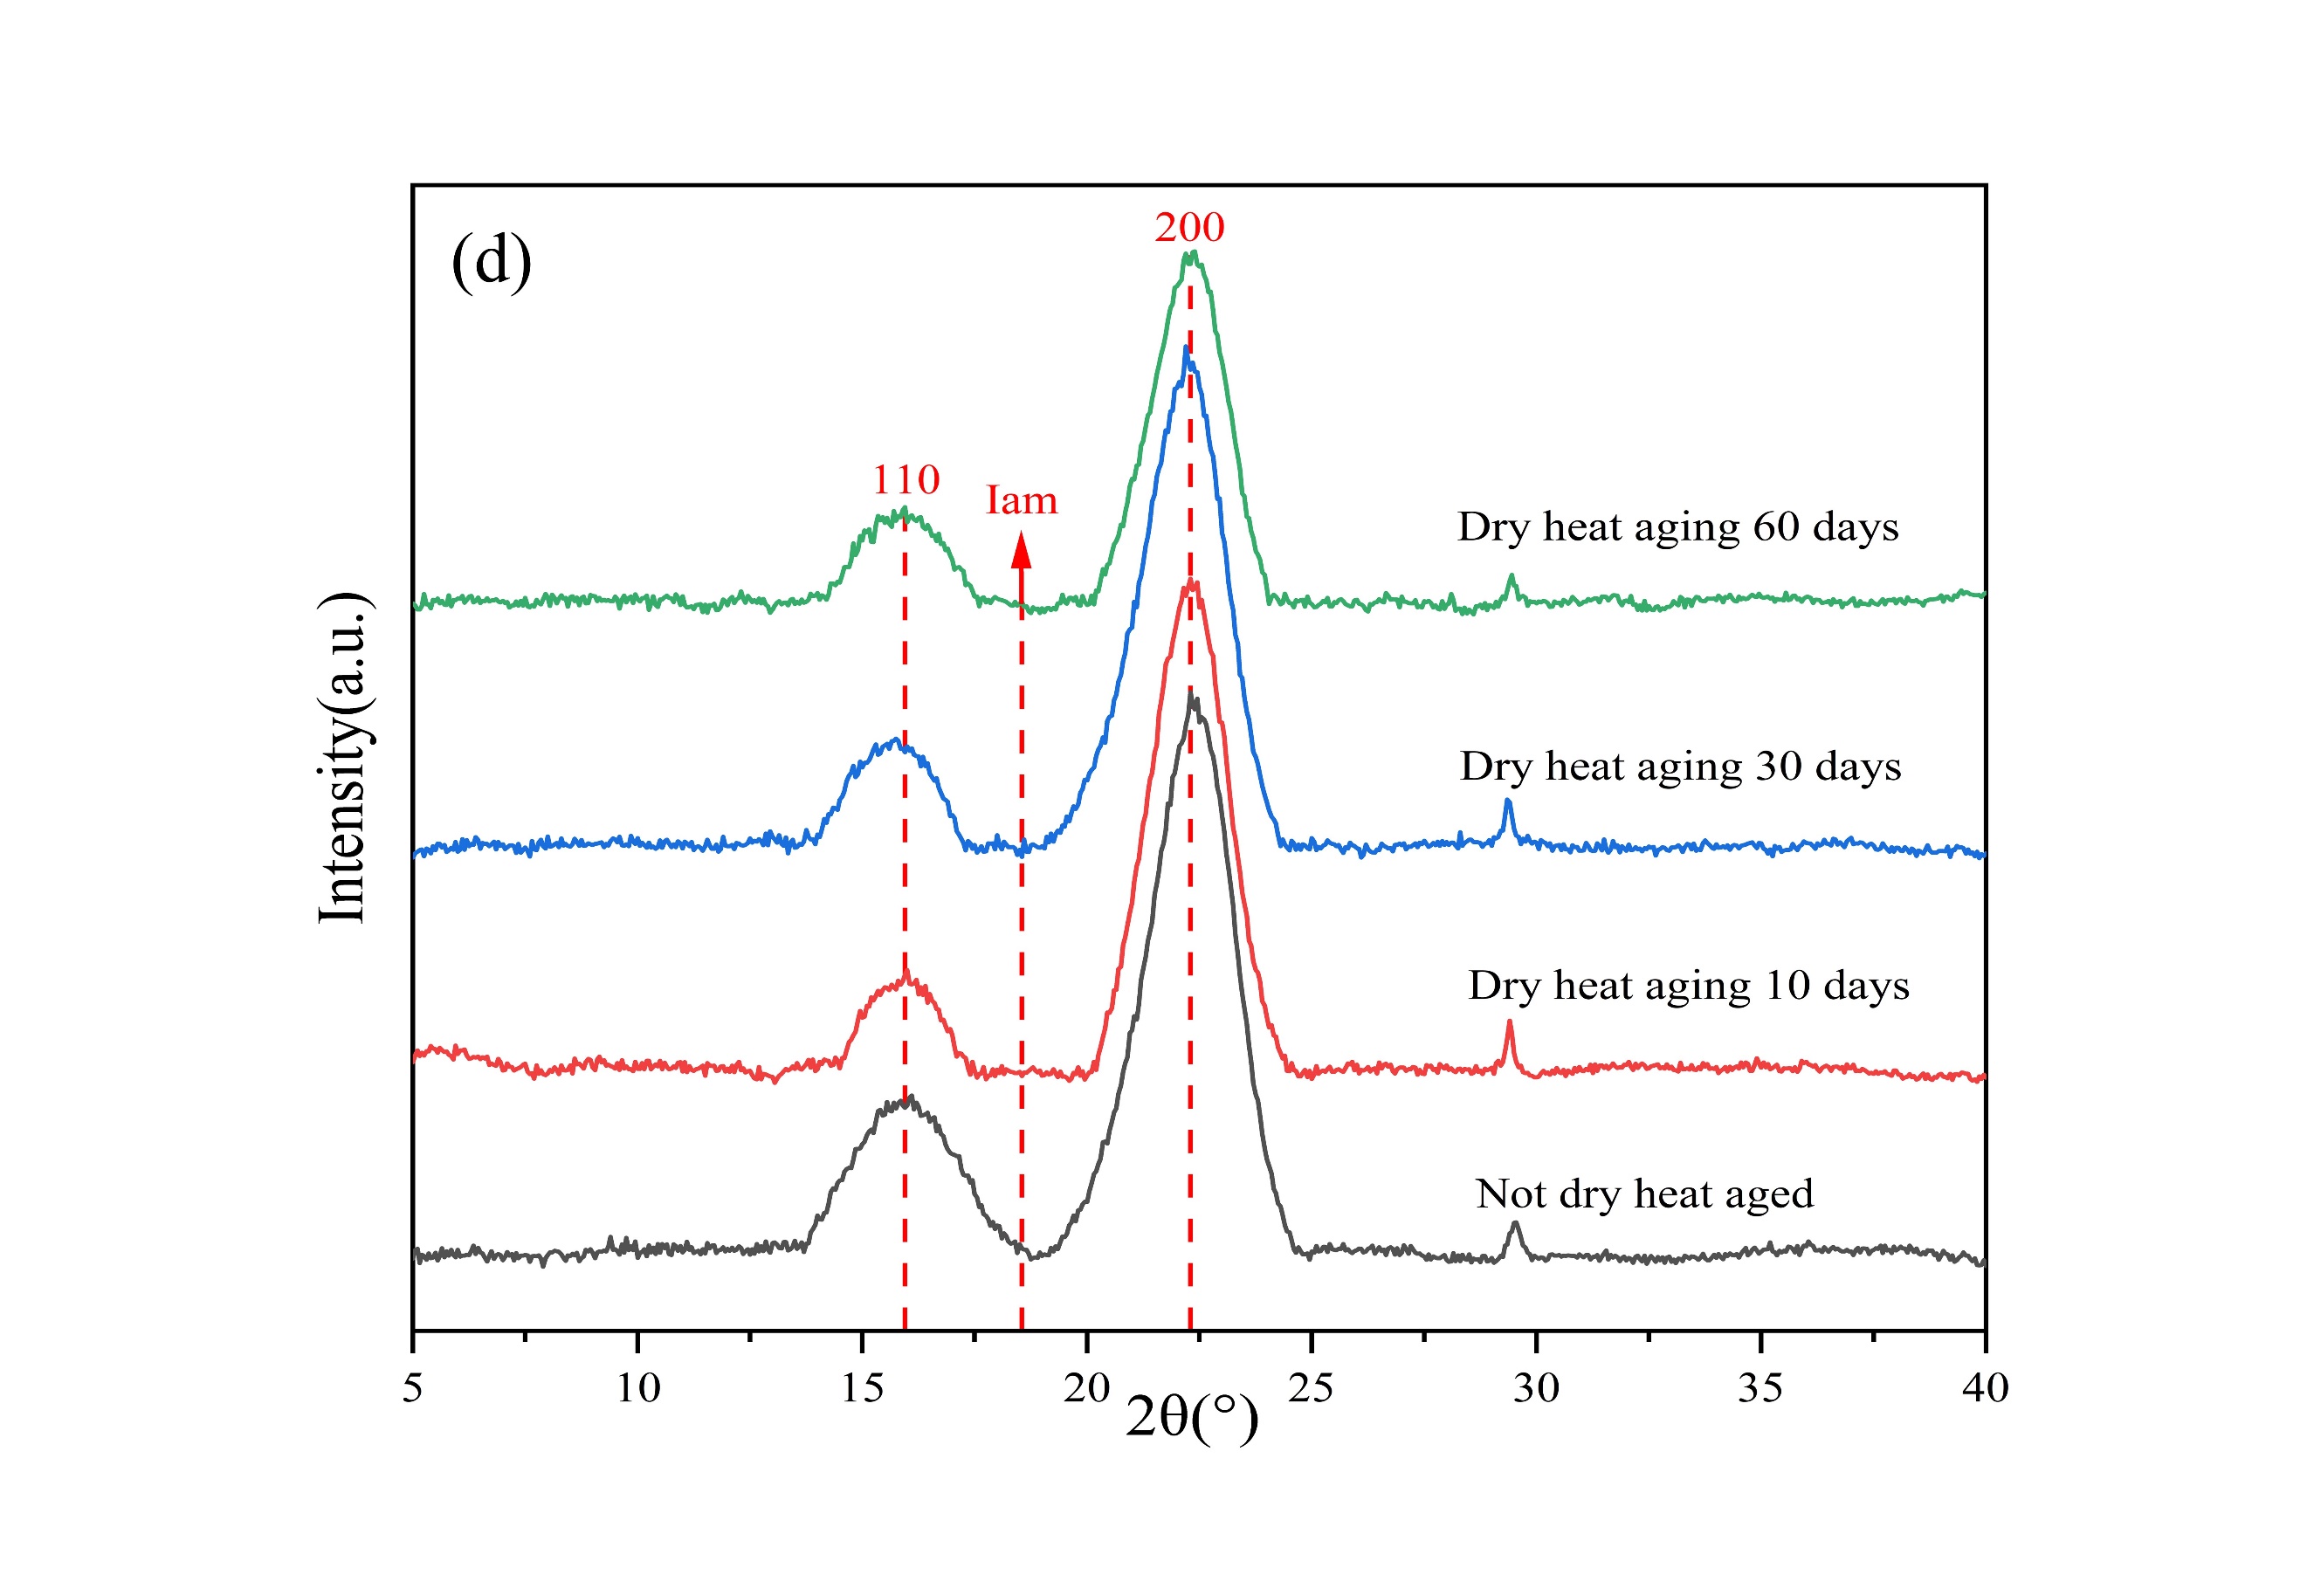


**Fig.S3.** XRD spectra of paper samples. (a) Renhua paper，(b) Changting paper1，(c) Changting paper2，(d) Panxian paper，(e) Fuyang paper，(f) Liancheng paper aging.


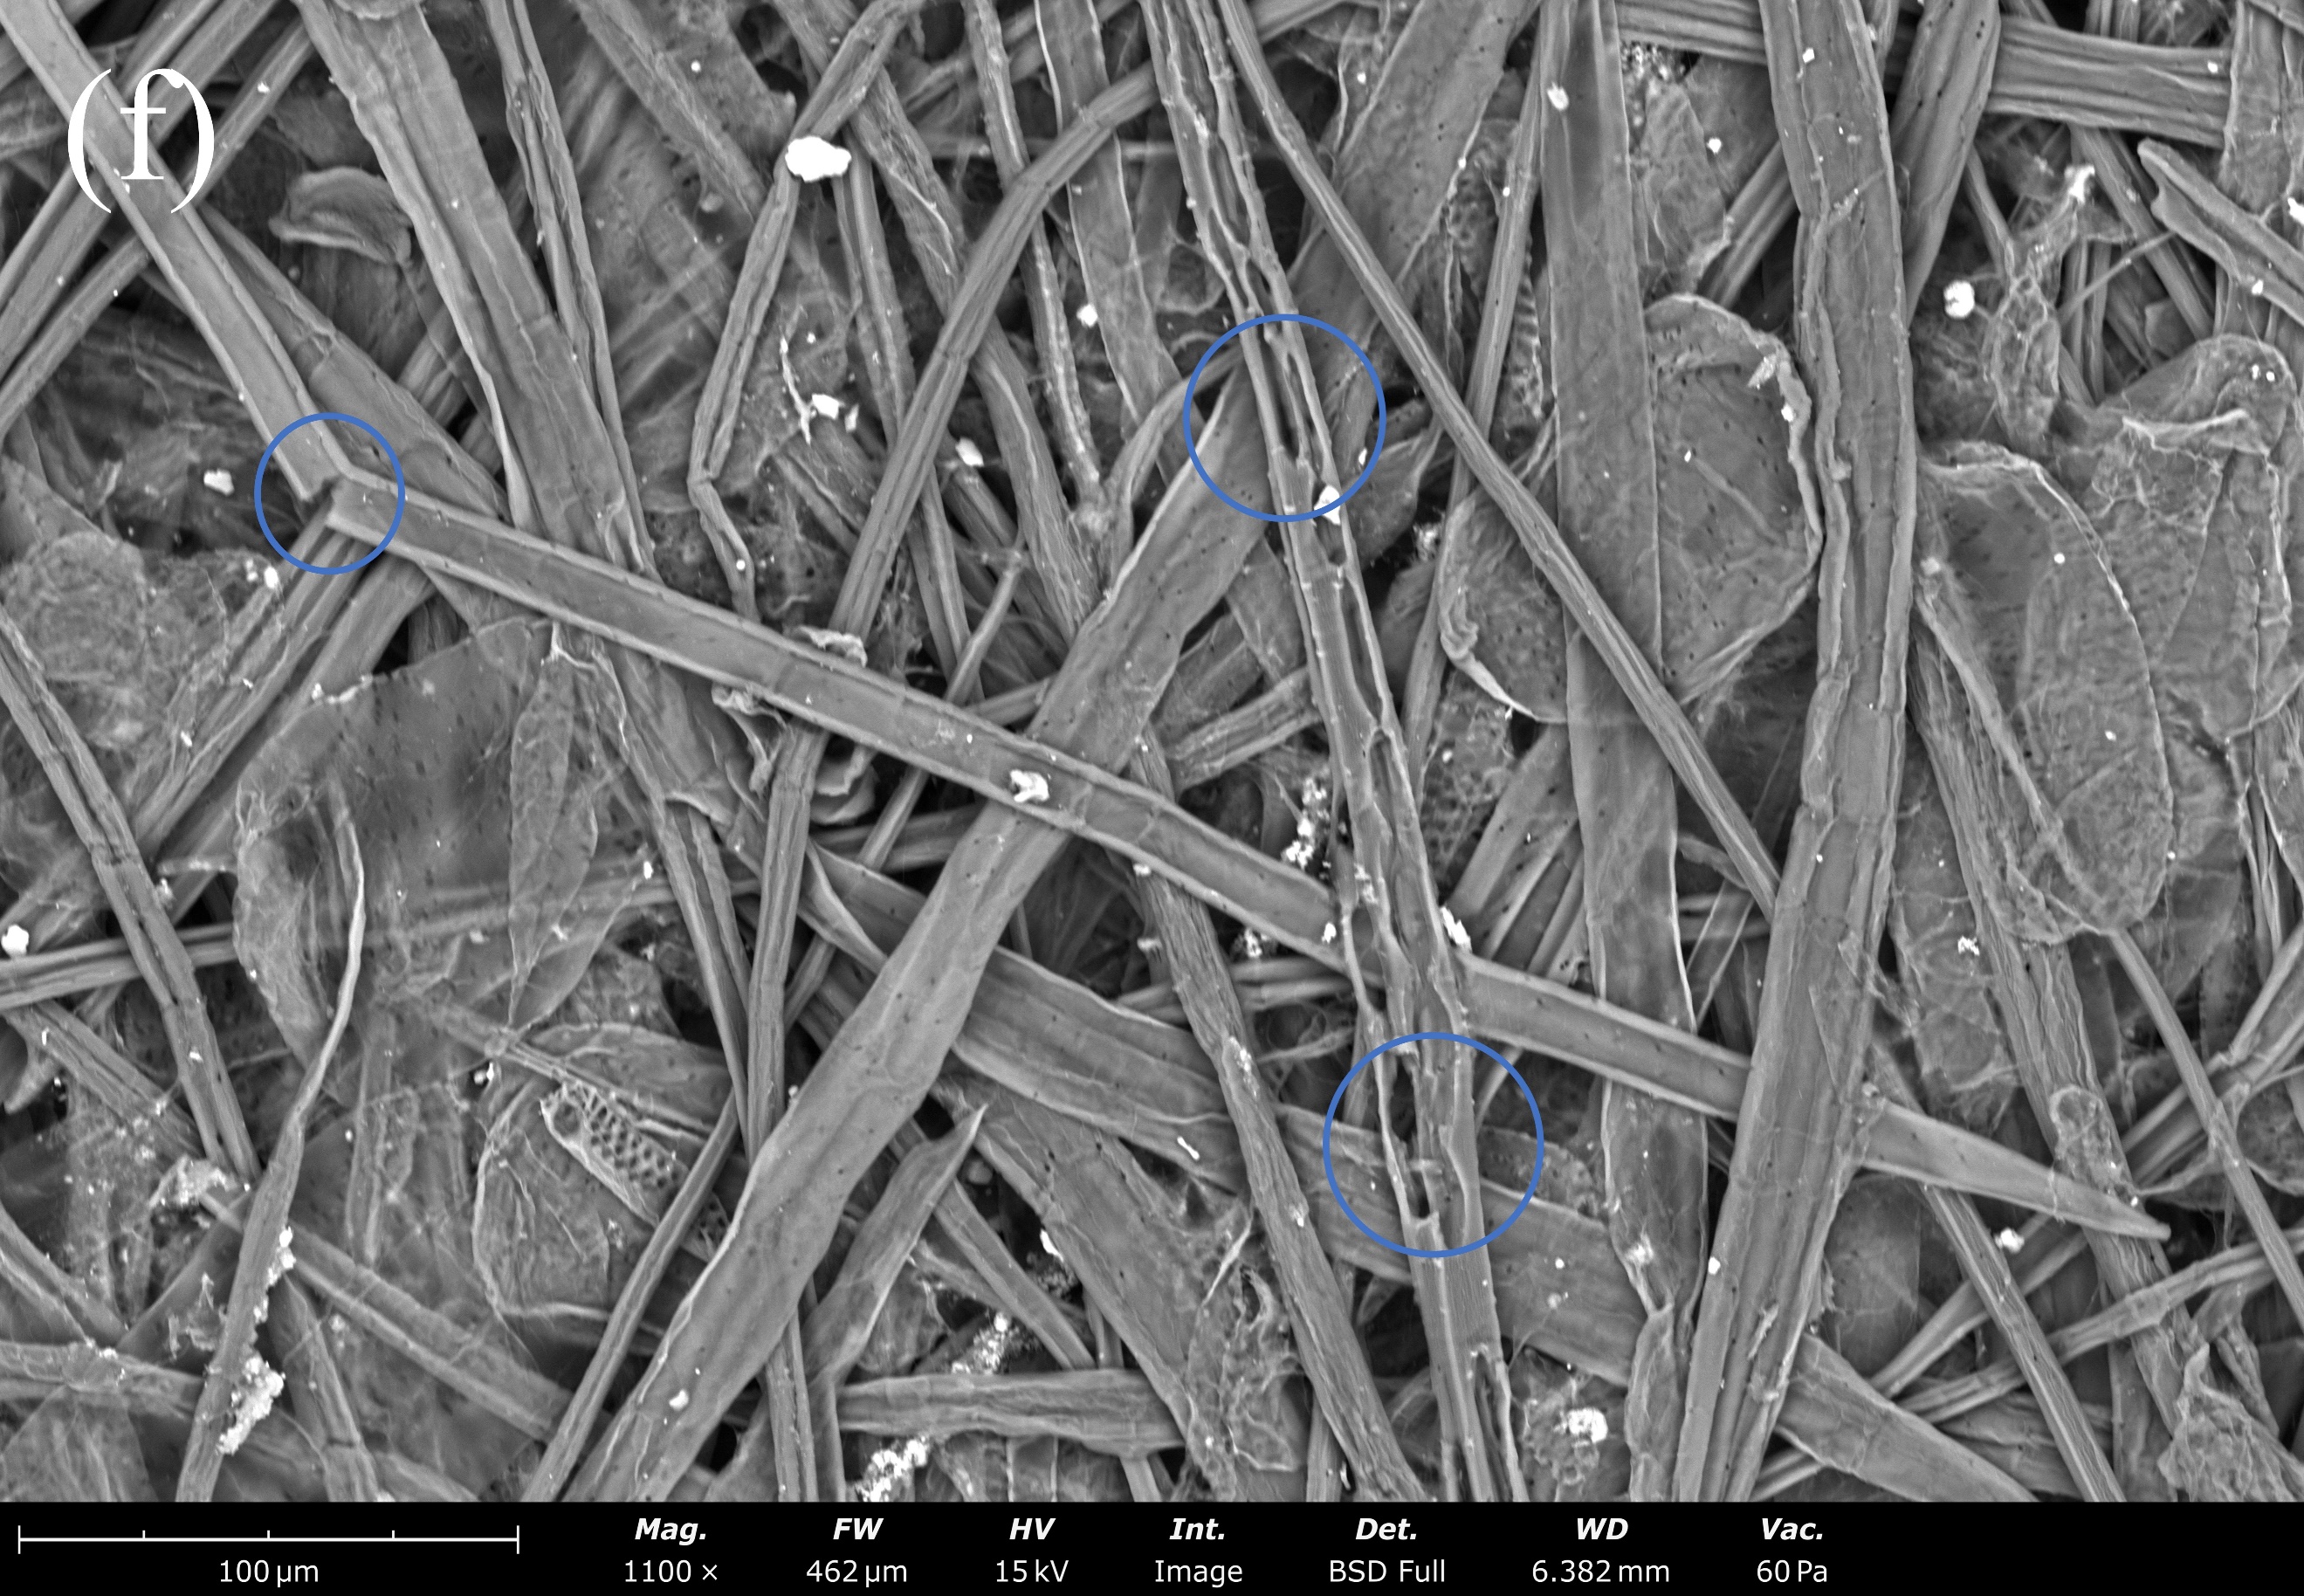

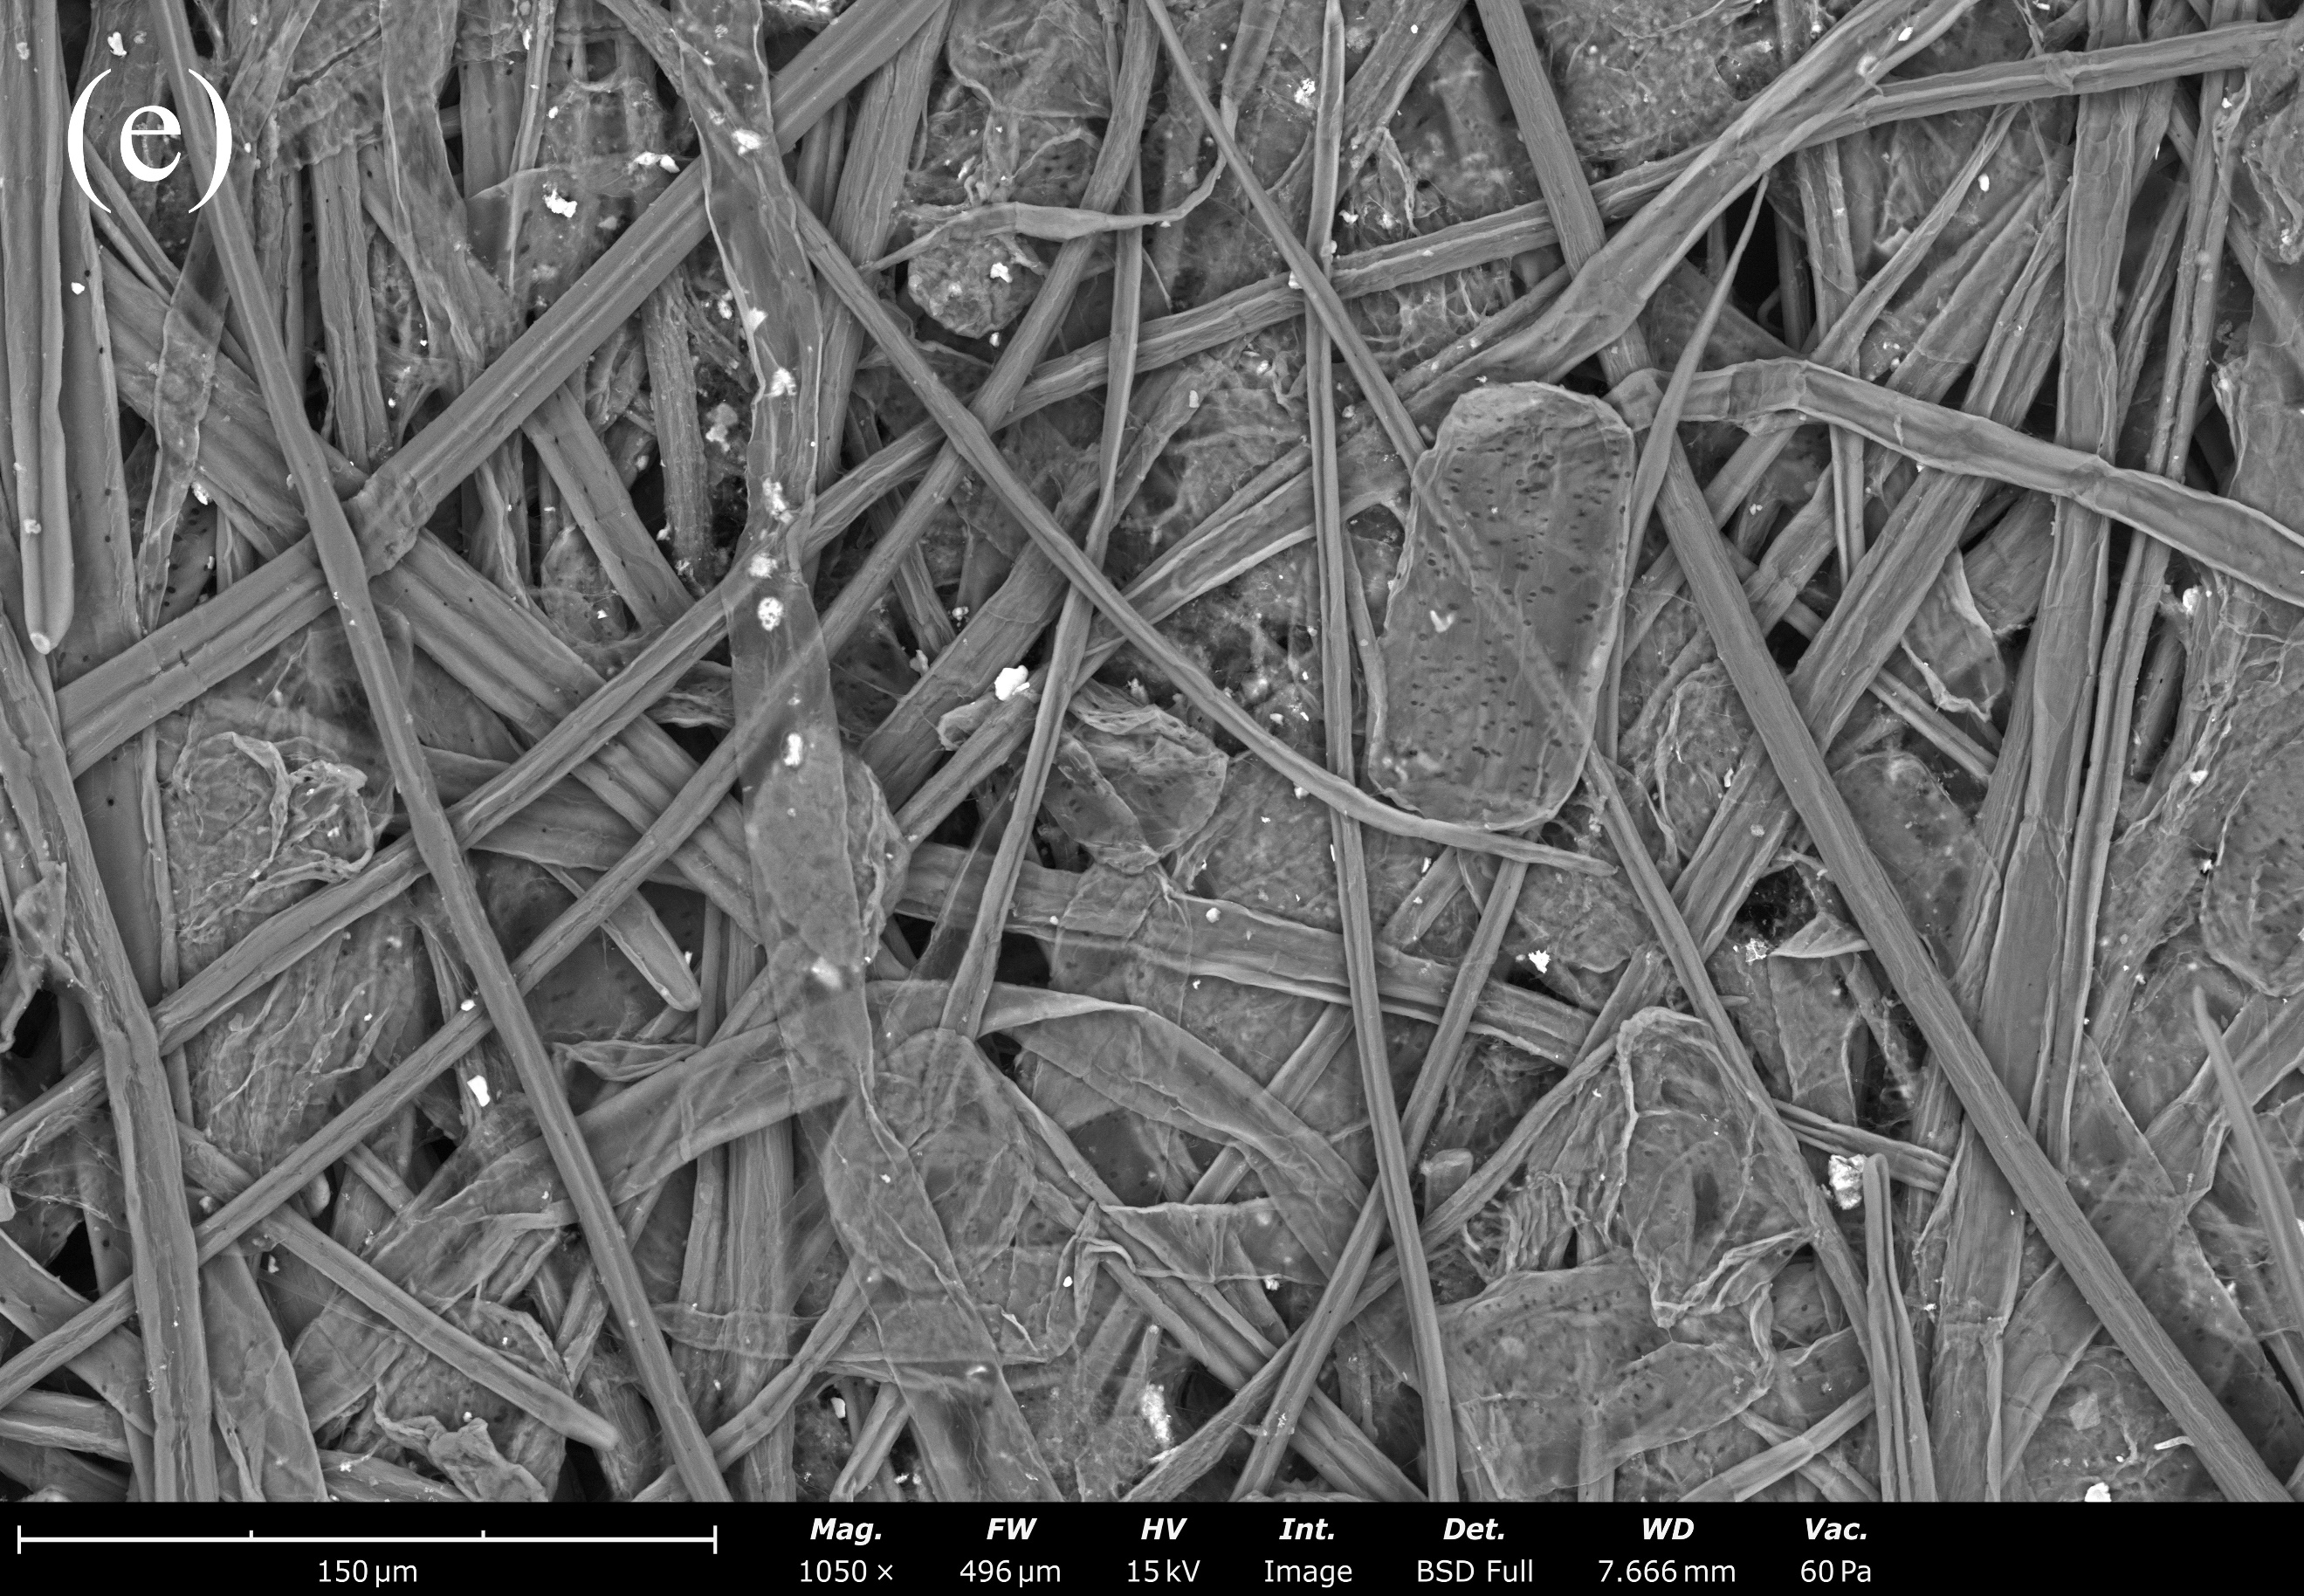

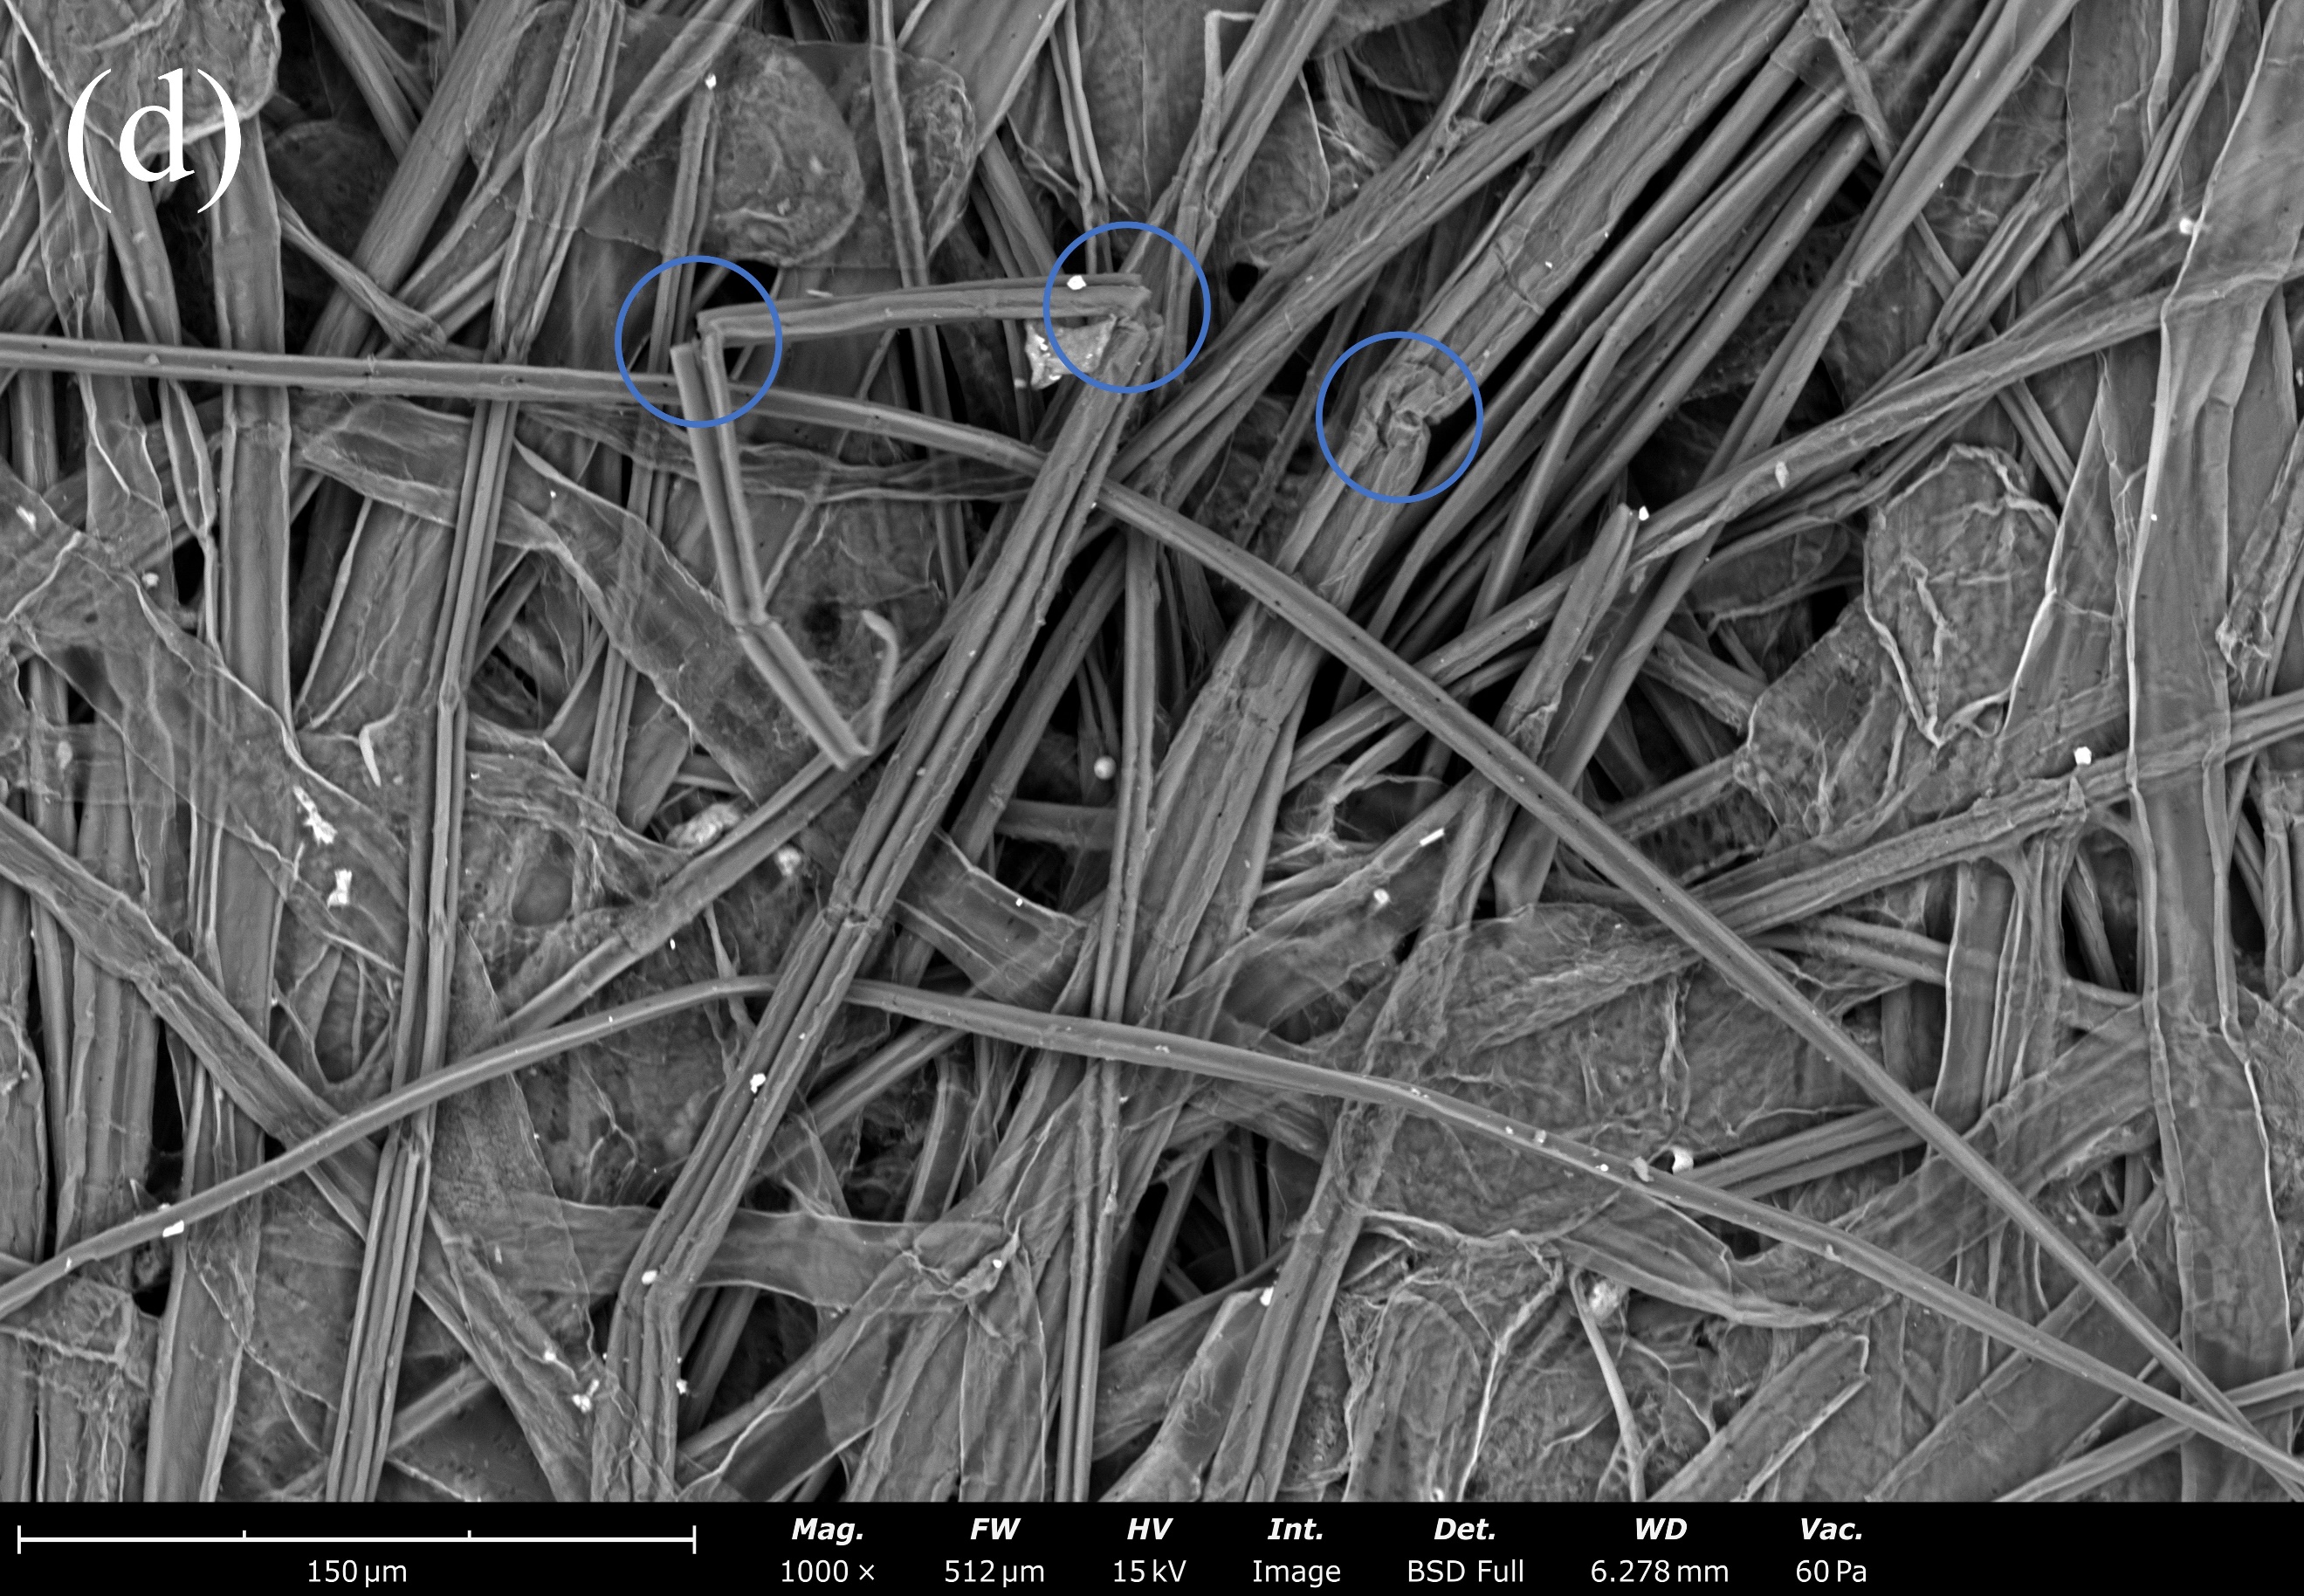

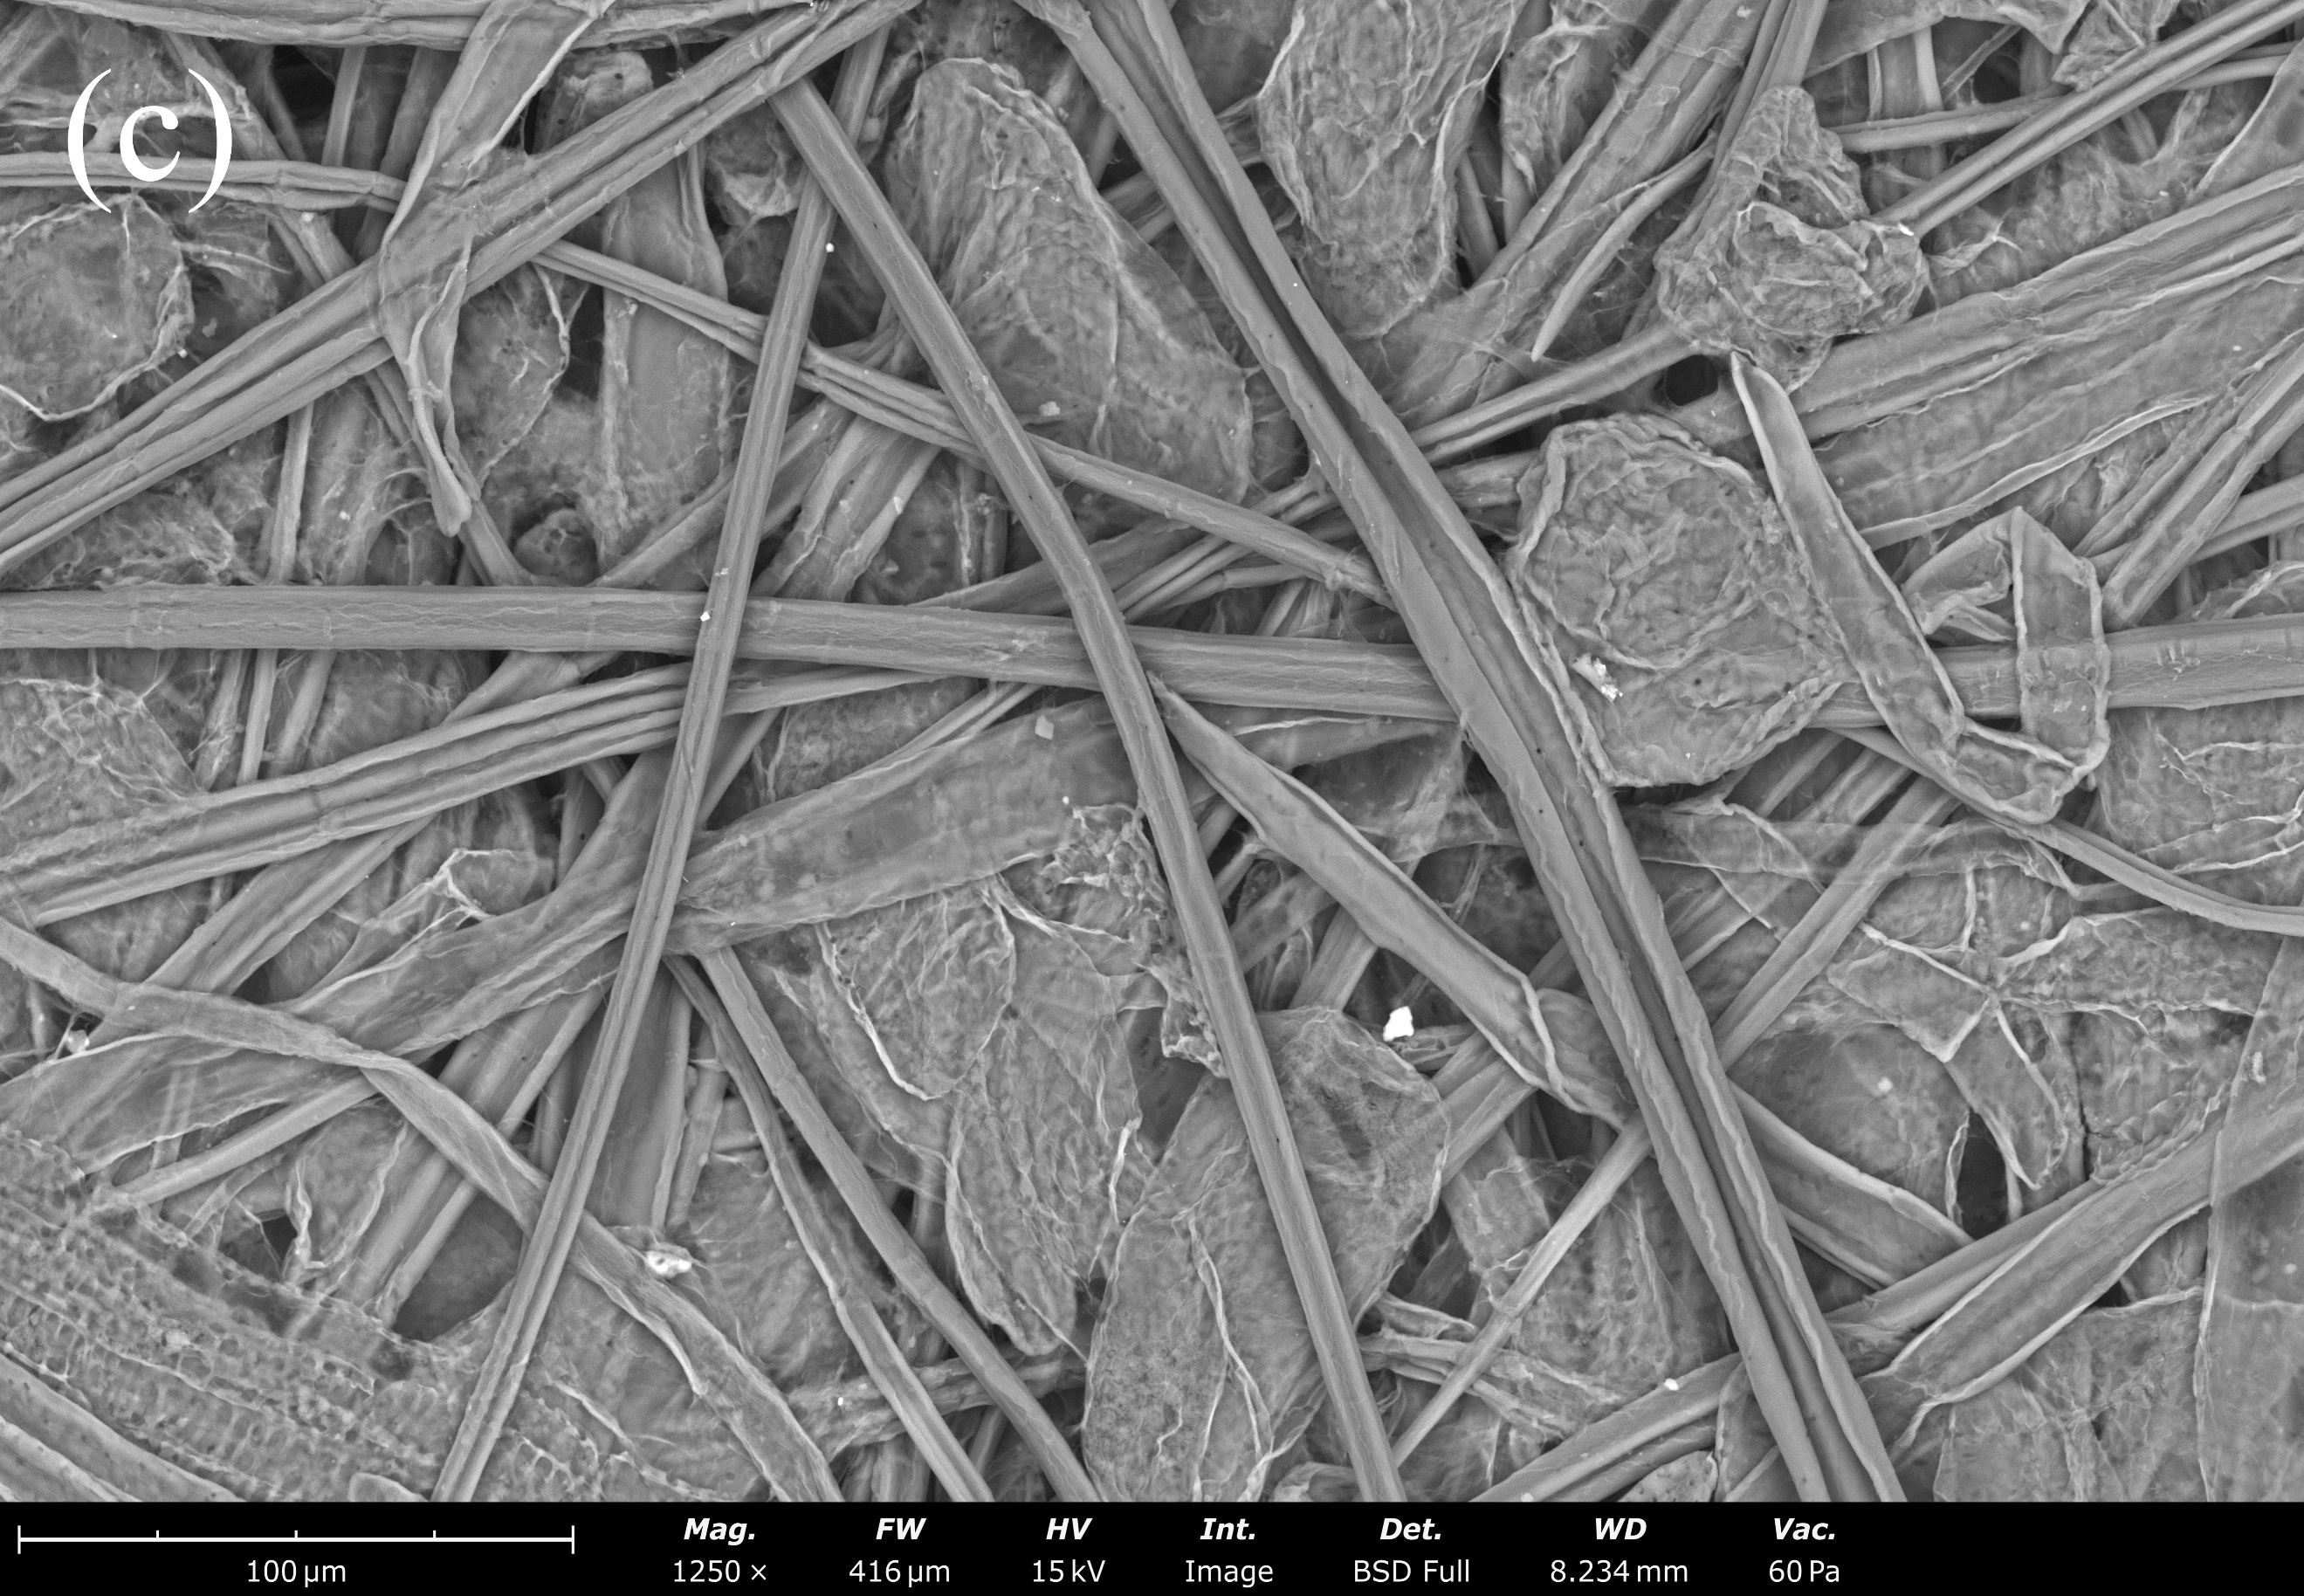

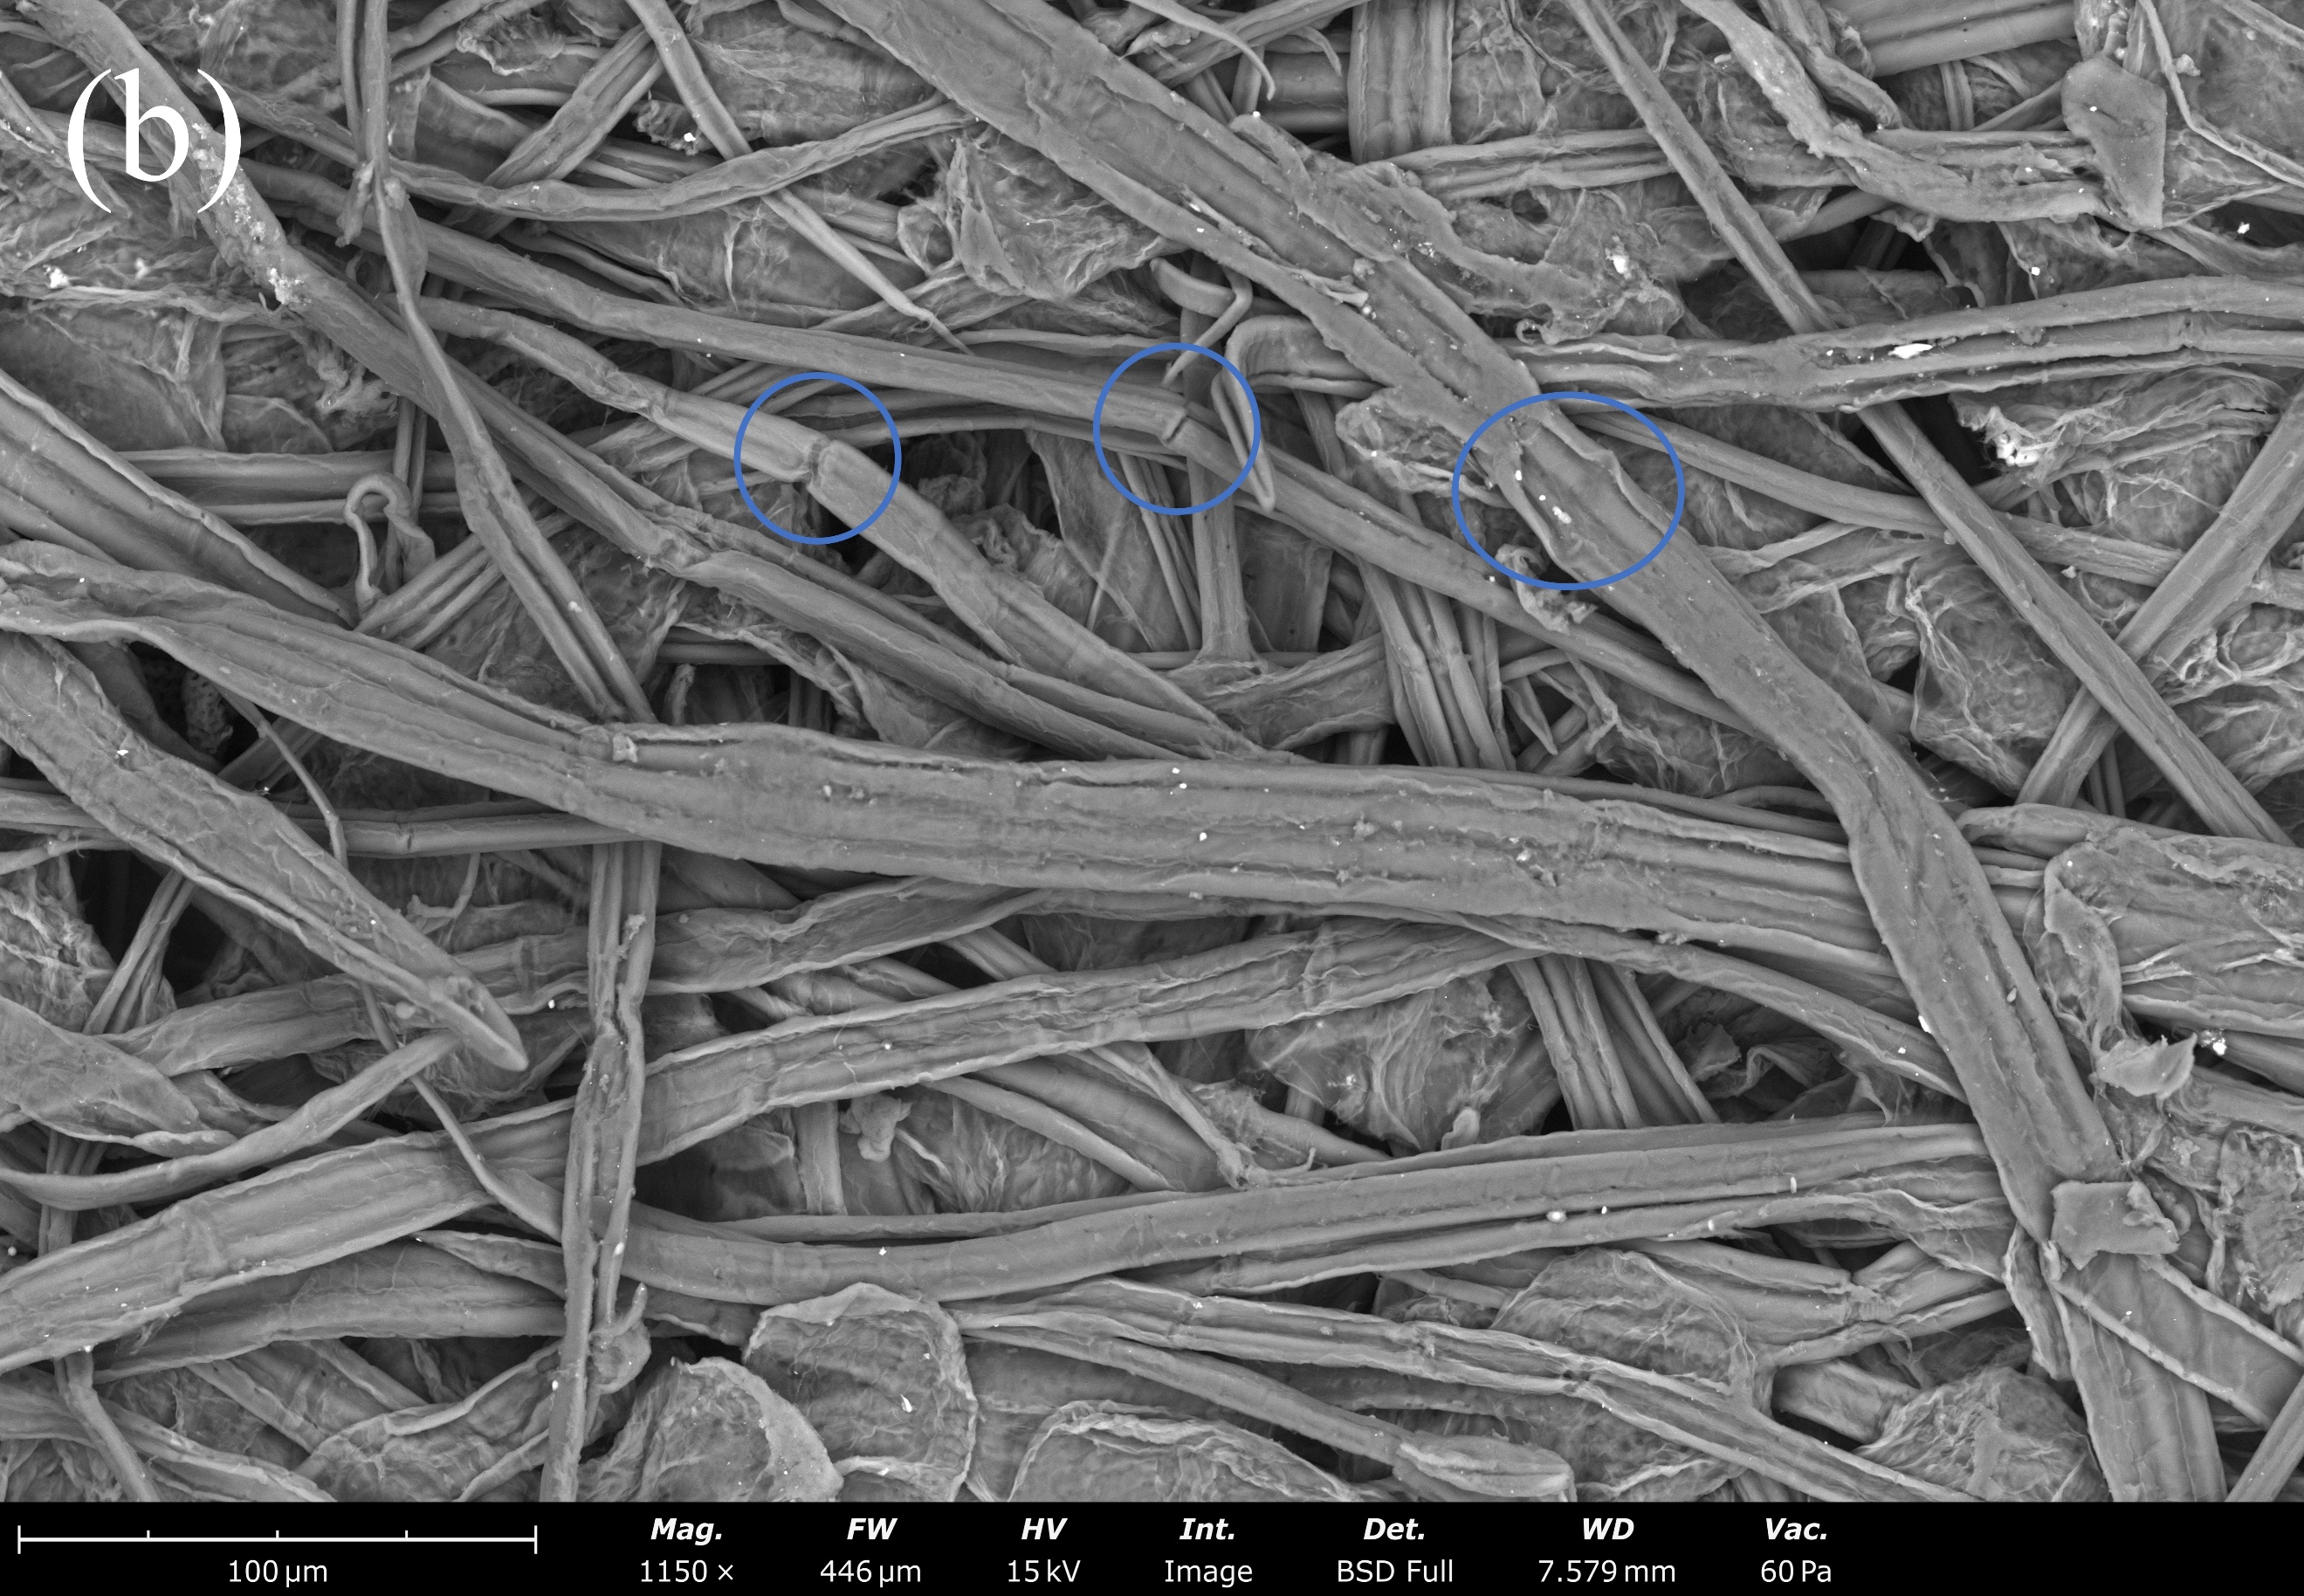

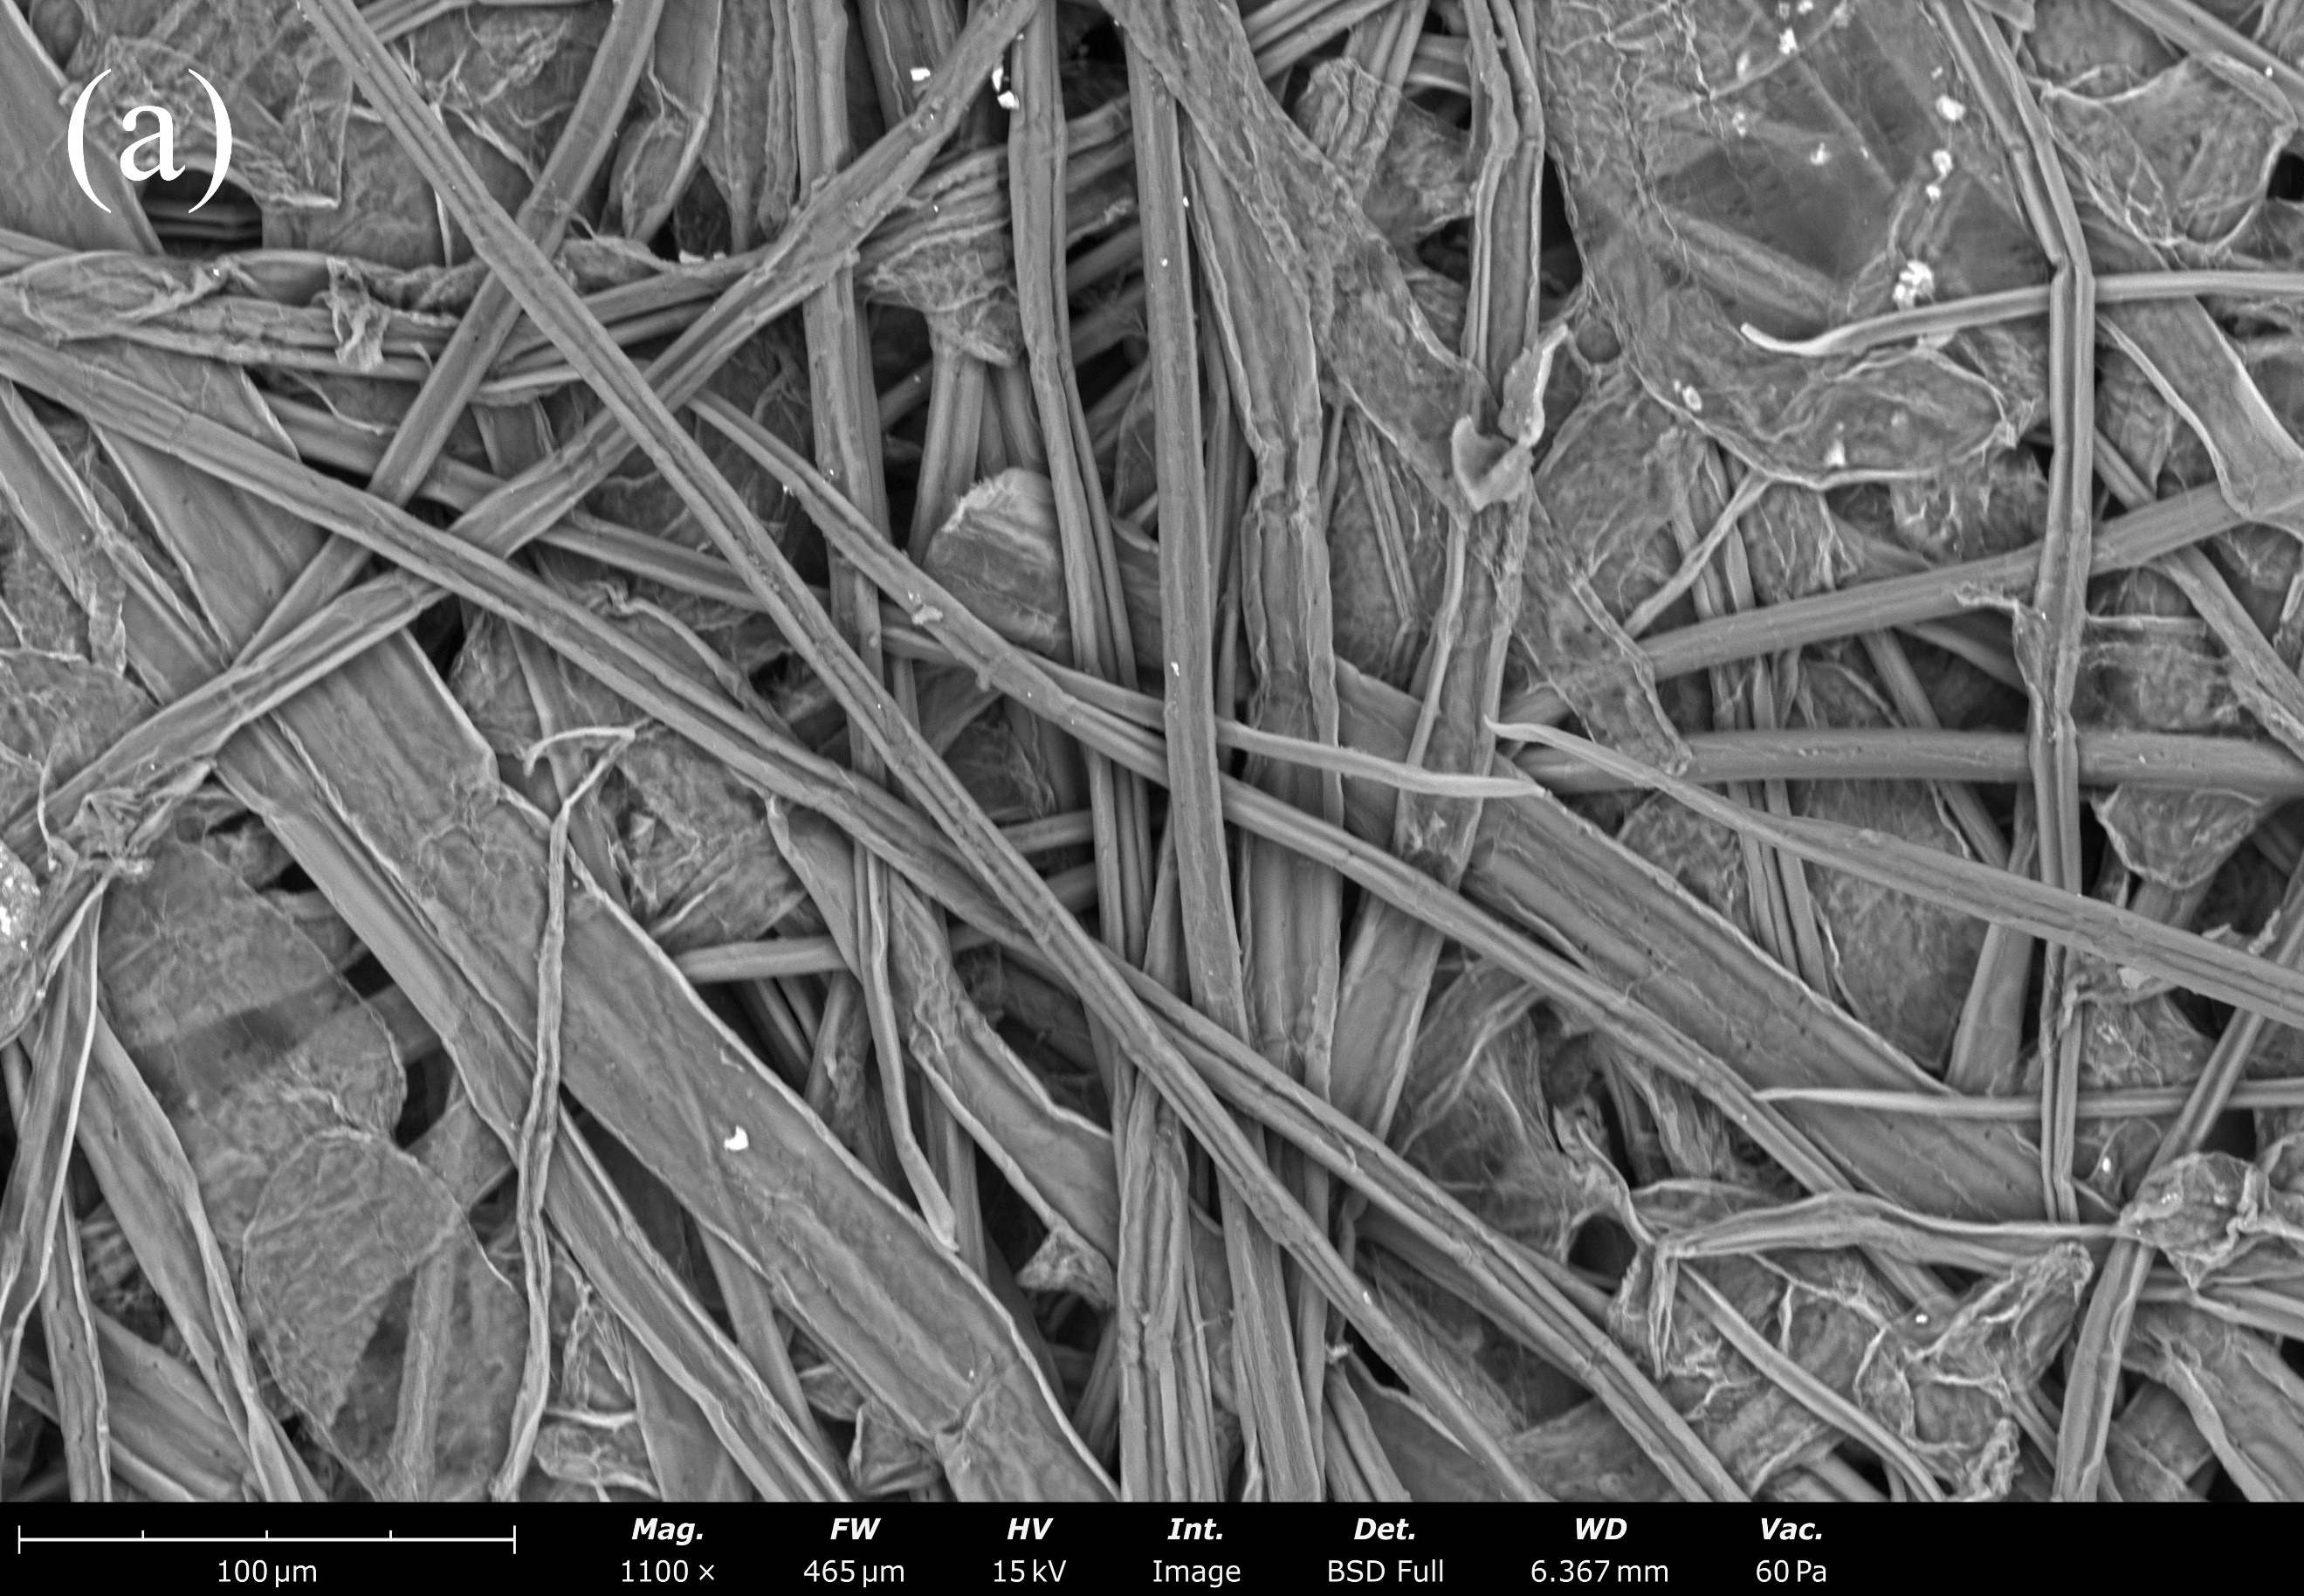


**Fig.S4.** Scanning electron microscope of paper samples. (a) Renhua paper，(b) Renhua paper aging for 60 days，(c) Changting paper1，(d) Changting paper1 aging for 60 days，(e) Lianchen paper，(f) Lianchen paper aging for 60 days.

**SEM-EDS**


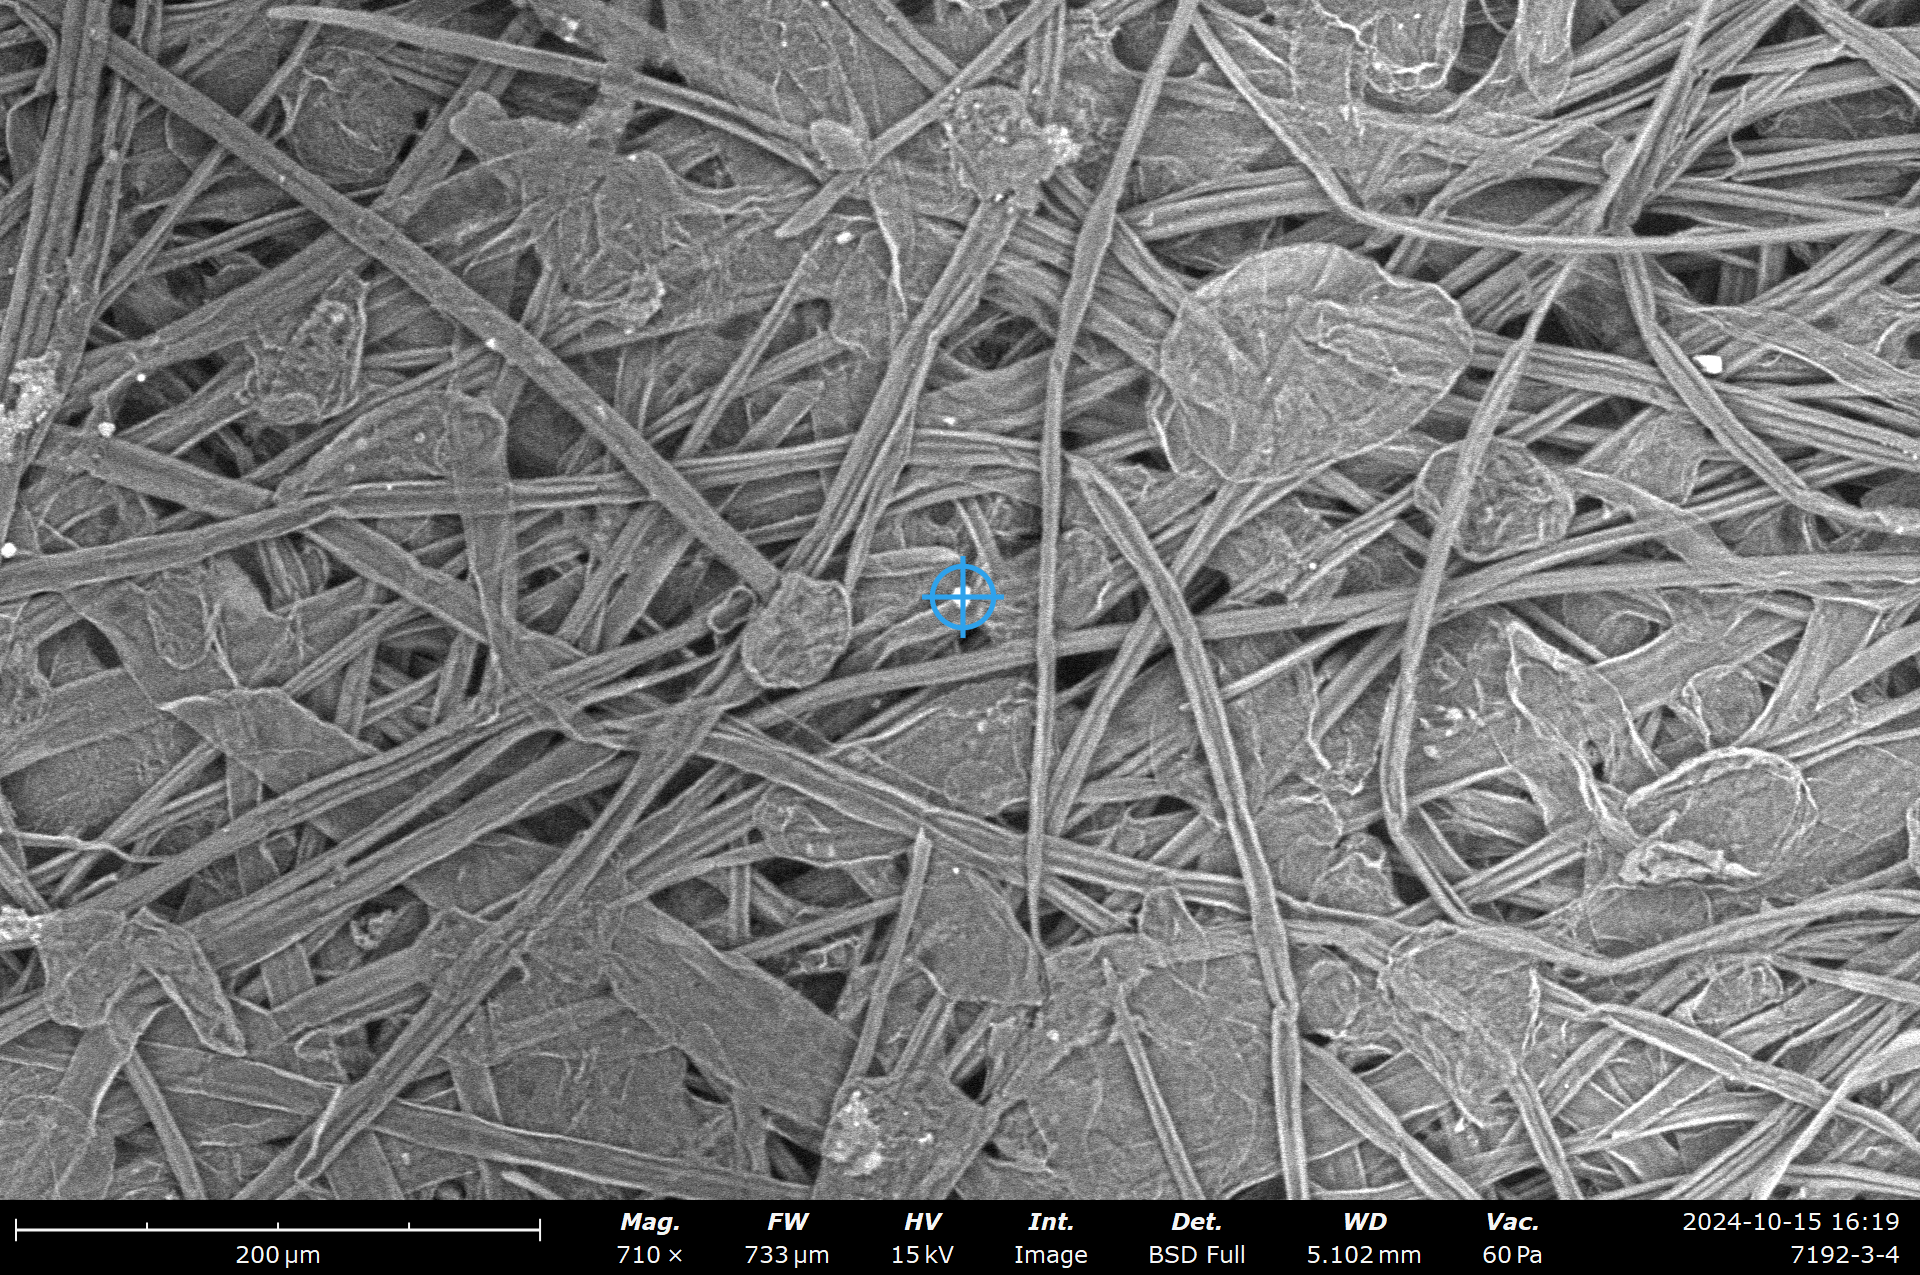


Renhua paper

FW: 733 μm, Mode: 15 kV - Image, Detector: BSD

|  | **Element   Number** | **Element   Symbol** | **Element   Name** | **Atomic   Conc.** | **Weight   Conc.** |
| --- | --- | --- | --- | --- | --- |
|  | 6 | C | Carbon | 33.272 | 22.000 |
|  | 8 | O | Oxygen | 52.674 | 46.400 |
|  | 14 | Si | Silicon | 0.453 | 0.700 |
|  | 20 | Ca | Calcium | 12.734 | 28.100 |
|  | 28 | Ni | Nickel | 0.867 | 2.800 |


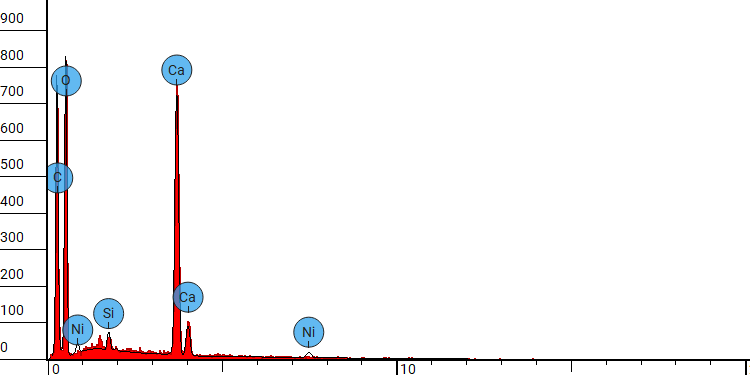


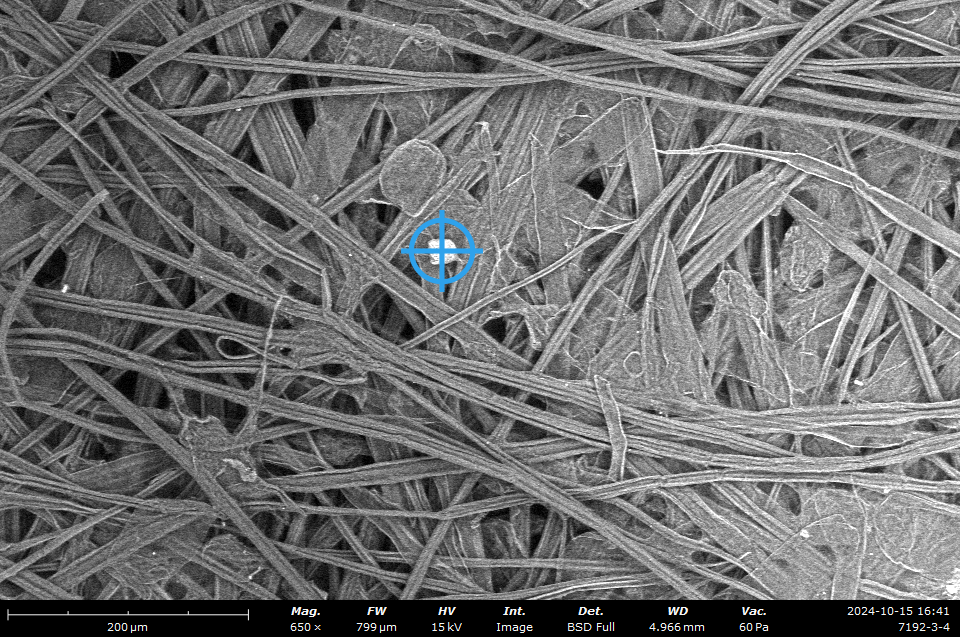


Changting paper1

FW: 799 μm, Mode: 15 kV - Image, Detector: BSD

|  | **Element   Number** | **Element   Symbol** | **Element   Name** | **Atomic   Conc.** | **Weight   Conc.** |
| --- | --- | --- | --- | --- | --- |
|  | 6 | C | Carbon | 29.431 | 19.000 |
|  | 8 | O | Oxygen | 54.880 | 47.200 |
|  | 20 | Ca | Calcium | 15.689 | 33.800 |


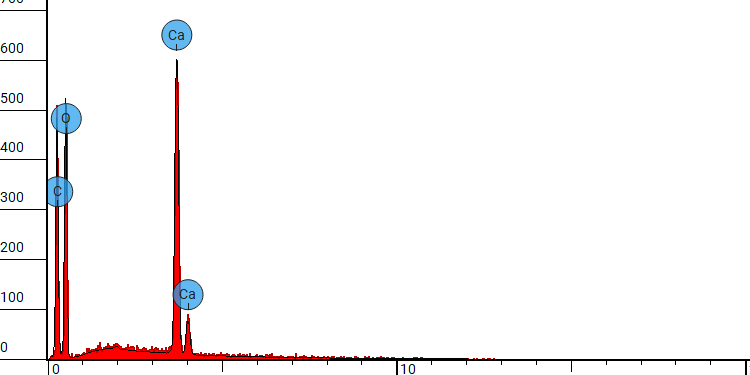


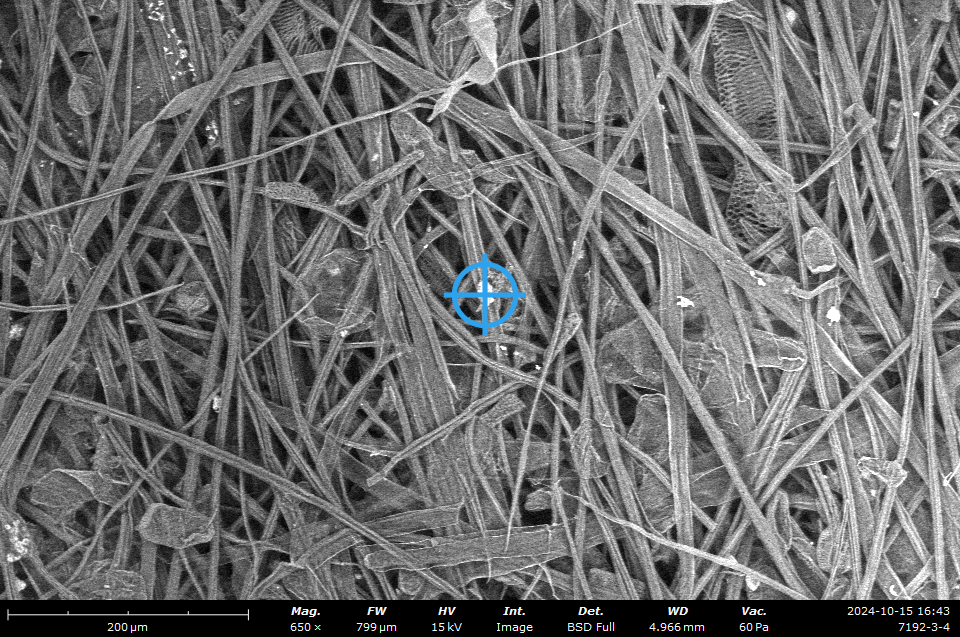


Changting paper2

FW: 799 μm, Mode: 15 kV - Image, Detector: BSD

|  | **Element   Number** | **Element   Symbol** | **Element   Name** | **Atomic   Conc.** | **Weight   Conc.** |
| --- | --- | --- | --- | --- | --- |
|  | 6 | C | Carbon | 27.578 | 16.300 |
|  | 8 | O | Oxygen | 49.911 | 39.300 |
|  | 20 | Ca | Calcium | 22.510 | 44.400 |


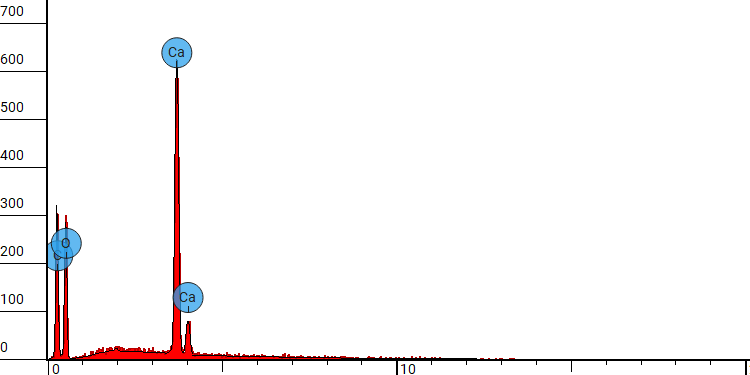


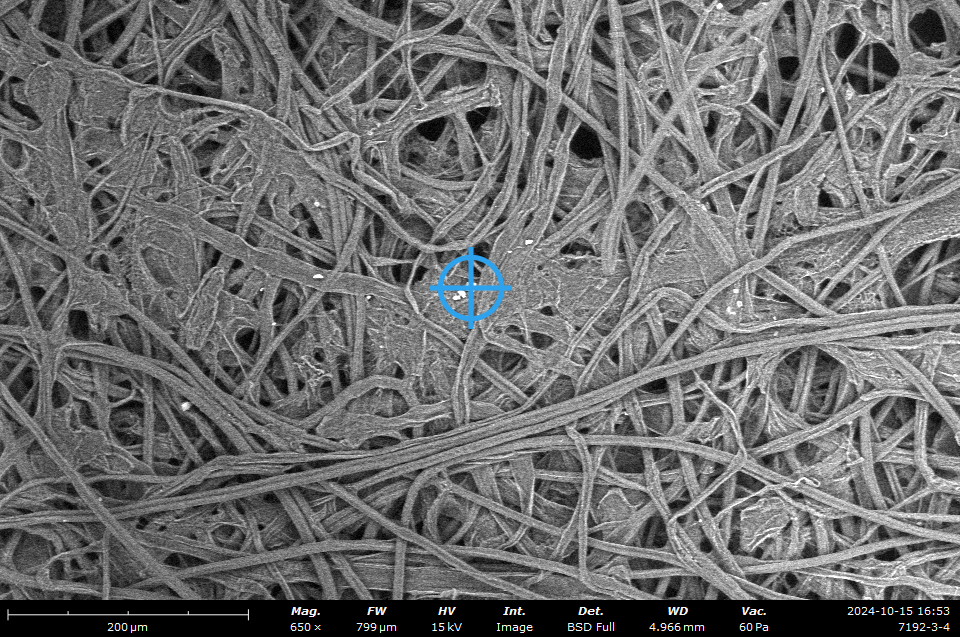


Fuyang paper

FW: 799 μm, Mode: 15 kV - Image, Detector: BSD

|  | **Element   Number** | **Element   Symbol** | **Element   Name** | **Atomic   Conc.** | **Weight   Conc.** |
| --- | --- | --- | --- | --- | --- |
|  | 6 | C | Carbon | 29.039 | 19.800 |
|  | 8 | O | Oxygen | 59.447 | 54.000 |
|  | 20 | Ca | Calcium | 11.514 | 26.200 |


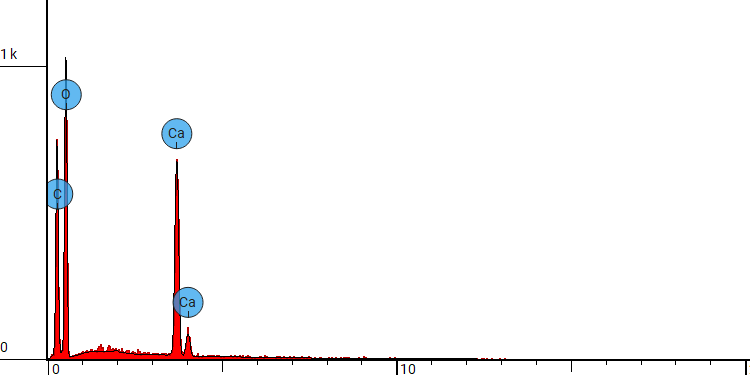


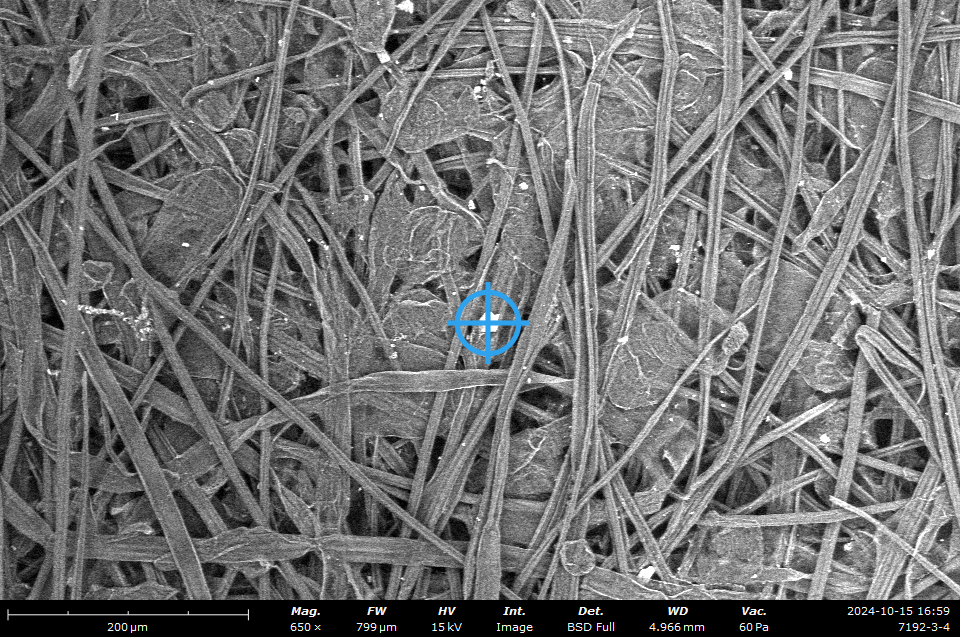


Liancheng paper

FW: 799 μm, Mode: 15 kV - Image, Detector: BSD

|  | **Element   Number** | **Element   Symbol** | **Element   Name** | **Atomic   Conc.** | **Weight   Conc.** |
| --- | --- | --- | --- | --- | --- |
|  | 6 | C | Carbon | 27.777 | 18.382 |
|  | 8 | O | Oxygen | 58.698 | 51.748 |
|  | 20 | Ca | Calcium | 13.526 | 29.870 |


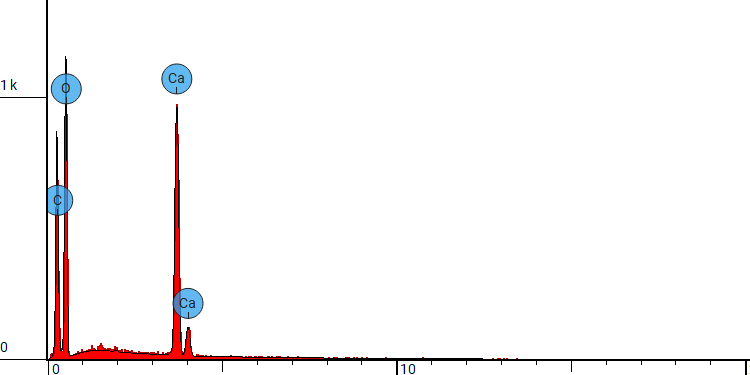

Supplement: Supplementary file 1 [file j_res-2024-0024_suppl_001.docx]
